# Supplementary material for: Perceptual processing in the ventral visual stream requires area TE but not rhinal cortex
Source: eLife. 2018 Oct 12;7:e36310. doi: 10.7554/eLife.36310 (PMC6207425; doi:10.7554/eLife.36310)
Supplement: Figure 2—source data 1. [file elife-36310-fig2-data1.xlsx]

## Sheet: exp 1
Treatment group	monkey ID	session #	morph_level(%)	pct.rog	weight (# of trials per session)		Data used to produce figures in the paper: Perceptual processing in the ventral visual stream requires area TE but not rhinal cortex Authors: Mark A. G. Eldridge1*, Narihisa Matsumoto2, John H. Wittig3, Evan C. Masseau1, Richard C. Saunders1, Barry J. Richmond1* 6/4/2018
1	1	1	0	5	20		Column 1 ('Treatment group') indicates treatment type: 1 = control, 2 = TE lesion, 3 = Rh lesion.
1	1	2	0	2.5	20
1	1	3	0	0	20
1	1	4	0	0	20
1	1	5	0	0	20
1	1	6	0	0	20
1	1	7	0	0	20
1	1	8	0	0	20
1	1	9	0	0	20
1	1	10	0	0	20
1	1	11	0	0	20
1	1	12	0	0	20
1	1	13	0	0	20
1	1	14	0	0	20
1	1	15	0	0	20
1	1	16	0	0	20
1	1	1	10	15	20
1	1	2	10	7.5	20
1	1	3	10	0	20
1	1	4	10	0	20
1	1	5	10	0	20
1	1	6	10	0	20
1	1	7	10	0	20
1	1	8	10	0	20
1	1	9	10	0	20
1	1	10	10	0	20
1	1	11	10	0	20
1	1	12	10	0	20
1	1	13	10	0	20
1	1	14	10	0	20
1	1	15	10	0	20
1	1	16	10	0	20
1	1	1	20	5	20
1	1	2	20	2.5	20
1	1	3	20	5	20
1	1	4	20	5	20
1	1	5	20	0	20
1	1	6	20	0	20
1	1	7	20	5	20
1	1	8	20	5	20
1	1	9	20	2.5	20
1	1	10	20	2.5	20
1	1	11	20	0	20
1	1	12	20	0	20
1	1	13	20	0	20
1	1	14	20	0	20
1	1	15	20	0	20
1	1	16	20	0	20
1	1	1	30	40	20
1	1	2	30	25	19
1	1	3	30	5	20
1	1	4	30	0	20
1	1	5	30	0	20
1	1	6	30	0	20
1	1	7	30	7.5	20
1	1	8	30	20	20
1	1	9	30	17.5	20
1	1	10	30	5	20
1	1	11	30	7.5	20
1	1	12	30	7.5	20
1	1	13	30	0	20
1	1	14	30	2.5	20
1	1	15	30	2.5	20
1	1	16	30	0	20
1	1	1	40	40	20
1	1	2	40	37.5	20
1	1	3	40	35	20
1	1	4	40	27.5	20
1	1	5	40	17.5	20
1	1	6	40	12.5	20
1	1	7	40	25	20
1	1	8	40	35	20
1	1	9	40	27.5	20
1	1	10	40	25	20
1	1	11	40	22.5	20
1	1	12	40	20	20
1	1	13	40	25	20
1	1	14	40	17.5	20
1	1	15	40	5	20
1	1	16	40	2.5	20
1	1	1	50	40	20
1	1	2	50	47.5	20
1	1	3	50	55	20
1	1	4	50	47.5	20
1	1	5	50	42.5	20
1	1	6	50	40	20
1	1	7	50	55	20
1	1	8	50	85	20
1	1	9	50	80	20
1	1	10	50	62.5	20
1	1	11	50	62.5	20
1	1	12	50	62.5	20
1	1	13	50	55	20
1	1	14	50	50	20
1	1	15	50	40	20
1	1	16	50	40	20
1	1	1	60	70	20
1	1	2	60	80	20
1	1	3	60	87.5	20
1	1	4	60	77.5	20
1	1	5	60	70	20
1	1	6	60	75	20
1	1	7	60	82.5	20
1	1	8	60	90	20
1	1	9	60	95	20
1	1	10	60	92.5	20
1	1	11	60	92.5	20
1	1	12	60	92.5	20
1	1	13	60	90	20
1	1	14	60	87.5	20
1	1	15	60	75	20
1	1	16	60	75	20
1	1	1	70	90	20
1	1	2	70	95	20
1	1	3	70	92.5	20
1	1	4	70	90	20
1	1	5	70	92.5	20
1	1	6	70	90	20
1	1	7	70	92.5	20
1	1	8	70	95	20
1	1	9	70	95	20
1	1	10	70	95	20
1	1	11	70	95	20
1	1	12	70	95	20
1	1	13	70	95	20
1	1	14	70	95	20
1	1	15	70	95	20
1	1	16	70	95	20
1	1	1	80	85	20
1	1	2	80	92.5	20
1	1	3	80	95	20
1	1	4	80	90	20
1	1	5	80	92.5	20
1	1	6	80	95	20
1	1	7	80	97.5	20
1	1	8	80	97.5	20
1	1	9	80	95	20
1	1	10	80	95	20
1	1	11	80	95	20
1	1	12	80	95	20
1	1	13	80	95	20
1	1	14	80	95	20
1	1	15	80	95	20
1	1	16	80	95	20
1	1	1	90	90	20
1	1	2	90	95	20
1	1	3	90	97.5	20
1	1	4	90	95	20
1	1	5	90	92.5	20
1	1	6	90	92.5	20
1	1	7	90	95	20
1	1	8	90	95	20
1	1	9	90	95	20
1	1	10	90	95	20
1	1	11	90	95	20
1	1	12	90	95	20
1	1	13	90	95	20
1	1	14	90	95	20
1	1	15	90	95	20
1	1	16	90	95	20
1	1	1	100	90	20
1	1	2	100	95	20
1	1	3	100	100	20
1	1	4	100	97.5	20
1	1	5	100	95	20
1	1	6	100	95	20
1	1	7	100	95	20
1	1	8	100	95	20
1	1	9	100	95	20
1	1	10	100	95	20
1	1	11	100	95	20
1	1	12	100	95	20
1	1	13	100	95	20
1	1	14	100	95	20
1	1	15	100	95	20
1	1	16	100	95	20
1	2	1	0	5	20
1	2	2	0	7.5	20
1	2	3	0	5	20
1	2	4	0	2.5	20
1	2	5	0	0	20
1	2	6	0	0	20
1	2	7	0	0	20
1	2	8	0	0	20
1	2	9	0	2.5	20
1	2	10	0	2.5	20
1	2	11	0	0	20
1	2	12	0	0	20
1	2	13	0	0	20
1	2	14	0	0	20
1	2	15	0	0	20
1	2	16	0	0	20
1	2	1	10	7.5	20
1	2	2	10	7.5	20
1	2	3	10	5	20
1	2	4	10	5	20
1	2	5	10	0	20
1	2	6	10	0	20
1	2	7	10	2.5	20
1	2	8	10	2.5	20
1	2	9	10	2.5	20
1	2	10	10	2.5	20
1	2	11	10	0	20
1	2	12	10	0	20
1	2	13	10	0	20
1	2	14	10	0	20
1	2	15	10	0	20
1	2	16	10	0	20
1	2	1	20	7.5	20
1	2	2	20	12.5	20
1	2	3	20	15	20
1	2	4	20	10	20
1	2	5	20	2.5	20
1	2	6	20	2.5	20
1	2	7	20	0	20
1	2	8	20	0	20
1	2	9	20	0	20
1	2	10	20	0	20
1	2	11	20	0	20
1	2	12	20	0	20
1	2	13	20	0	20
1	2	14	20	0	20
1	2	15	20	0	20
1	2	16	20	0	20
1	2	1	30	10	20
1	2	2	30	17.5	20
1	2	3	30	30	20
1	2	4	30	30	20
1	2	5	30	15	20
1	2	6	30	10	20
1	2	7	30	10	20
1	2	8	30	7.5	20
1	2	9	30	10	20
1	2	10	30	12.5	20
1	2	11	30	2.5	20
1	2	12	30	0	20
1	2	13	30	10	20
1	2	14	30	10	20
1	2	15	30	5	20
1	2	16	30	5	20
1	2	1	40	22.5	20
1	2	2	40	37.5	20
1	2	3	40	40	20
1	2	4	40	52.5	20
1	2	5	40	60	20
1	2	6	40	45	20
1	2	7	40	42.5	20
1	2	8	40	50	20
1	2	9	40	62.5	20
1	2	10	40	62.5	20
1	2	11	40	60	20
1	2	12	40	52.5	20
1	2	13	40	42.5	20
1	2	14	40	37.5	20
1	2	15	40	17.5	20
1	2	16	40	15	20
1	2	1	50	57.5	20
1	2	2	50	60	20
1	2	3	50	65	20
1	2	4	50	62.5	20
1	2	5	50	67.5	20
1	2	6	50	82.5	20
1	2	7	50	82.5	20
1	2	8	50	82.5	20
1	2	9	50	85	20
1	2	10	50	90	20
1	2	11	50	95	20
1	2	12	50	92.5	20
1	2	13	50	87.5	20
1	2	14	50	82.5	20
1	2	15	50	72.5	20
1	2	16	50	65	20
1	2	1	60	72.5	20
1	2	2	60	57.5	20
1	2	3	60	72.5	20
1	2	4	60	87.5	20
1	2	5	60	85	20
1	2	6	60	92.5	20
1	2	7	60	100	20
1	2	8	60	95	20
1	2	9	60	95	20
1	2	10	60	100	20
1	2	11	60	97.5	20
1	2	12	60	95	20
1	2	13	60	97.5	20
1	2	14	60	95	20
1	2	15	60	87.5	20
1	2	16	60	82.5	20
1	2	1	70	90	20
1	2	2	70	80	20
1	2	3	70	82.5	20
1	2	4	70	82.5	20
1	2	5	70	87.5	20
1	2	6	70	95	20
1	2	7	70	92.5	20
1	2	8	70	97.5	20
1	2	9	70	97.5	20
1	2	10	70	95	20
1	2	11	70	97.5	20
1	2	12	70	95	20
1	2	13	70	92.5	20
1	2	14	70	95	20
1	2	15	70	82.5	20
1	2	16	70	75	20
1	2	1	80	87.5	20
1	2	2	80	80	20
1	2	3	80	87.5	20
1	2	4	80	90	20
1	2	5	80	87.5	20
1	2	6	80	92.5	20
1	2	7	80	95	20
1	2	8	80	97.5	20
1	2	9	80	95	20
1	2	10	80	92.5	20
1	2	11	80	95	20
1	2	12	80	97.5	20
1	2	13	80	95	20
1	2	14	80	92.5	20
1	2	15	80	90	20
1	2	16	80	87.5	20
1	2	1	90	95	20
1	2	2	90	87.5	20
1	2	3	90	90	20
1	2	4	90	95	20
1	2	5	90	92.5	20
1	2	6	90	90	20
1	2	7	90	90	20
1	2	8	90	97.5	20
1	2	9	90	100	20
1	2	10	90	97.5	20
1	2	11	90	97.5	20
1	2	12	90	100	20
1	2	13	90	100	20
1	2	14	90	97.5	20
1	2	15	90	95	20
1	2	16	90	85	20
1	2	1	100	87.5	20
1	2	2	100	82.5	20
1	2	3	100	90	20
1	2	4	100	87.5	20
1	2	5	100	90	20
1	2	6	100	95	20
1	2	7	100	90	20
1	2	8	100	90	20
1	2	9	100	92.5	20
1	2	10	100	97.5	20
1	2	11	100	100	20
1	2	12	100	100	20
1	2	13	100	100	20
1	2	14	100	90	20
1	2	15	100	80	20
1	2	16	100	82.5	20
1	3	1	0	15	20
1	3	2	0	15	20
1	3	3	0	5	20
1	3	4	0	5	20
1	3	5	0	2.5	20
1	3	6	0	2.5	20
1	3	7	0	0	20
1	3	8	0	0	20
1	3	9	0	0	20
1	3	10	0	0	20
1	3	11	0	2.5	20
1	3	12	0	2.5	20
1	3	13	0	0	20
1	3	14	0	2.5	20
1	3	15	0	5	20
1	3	16	0	2.5	20
1	3	1	10	5	20
1	3	2	10	12.5	20
1	3	3	10	12.5	20
1	3	4	10	7.5	20
1	3	5	10	2.5	20
1	3	6	10	2.5	20
1	3	7	10	7.5	20
1	3	8	10	7.5	20
1	3	9	10	2.5	20
1	3	10	10	0	20
1	3	11	10	0	20
1	3	12	10	0	20
1	3	13	10	0	20
1	3	14	10	0	20
1	3	15	10	0	20
1	3	16	10	0	20
1	3	1	20	15	20
1	3	2	20	25	20
1	3	3	20	20	20
1	3	4	20	10	20
1	3	5	20	2.5	20
1	3	6	20	5	20
1	3	7	20	12.5	20
1	3	8	20	15	20
1	3	9	20	5	20
1	3	10	20	0	20
1	3	11	20	0	20
1	3	12	20	2.5	20
1	3	13	20	2.5	20
1	3	14	20	0	20
1	3	15	20	0	20
1	3	16	20	2.5	20
1	3	1	30	25	20
1	3	2	30	37.5	20
1	3	3	30	40	20
1	3	4	30	37.5	20
1	3	5	30	12.5	20
1	3	6	30	10	20
1	3	7	30	15	20
1	3	8	30	20	20
1	3	9	30	17.5	20
1	3	10	30	12.5	20
1	3	11	30	15	20
1	3	12	30	20	20
1	3	13	30	20	20
1	3	14	30	10	20
1	3	15	30	7.5	20
1	3	16	30	10	20
1	3	1	40	30	20
1	3	2	40	52.5	20
1	3	3	40	60	20
1	3	4	40	65	20
1	3	5	40	67.5	20
1	3	6	40	62.5	20
1	3	7	40	55	20
1	3	8	40	47.5	20
1	3	9	40	45	20
1	3	10	40	57.5	20
1	3	11	40	70	20
1	3	12	40	60	20
1	3	13	40	52.5	20
1	3	14	40	40	20
1	3	15	40	32.5	20
1	3	16	40	42.5	20
1	3	1	50	62.5	20
1	3	2	50	72.5	20
1	3	3	50	82.5	20
1	3	4	50	82.5	20
1	3	5	50	85	20
1	3	6	50	80	20
1	3	7	50	80	20
1	3	8	50	90	20
1	3	9	50	85	20
1	3	10	50	80	20
1	3	11	50	82.5	20
1	3	12	50	87.5	20
1	3	13	50	87.5	20
1	3	14	50	85	20
1	3	15	50	77.5	20
1	3	16	50	72.5	20
1	3	1	60	80	20
1	3	2	60	87.5	20
1	3	3	60	92.5	20
1	3	4	60	92.5	20
1	3	5	60	95	20
1	3	6	60	97.5	20
1	3	7	60	97.5	20
1	3	8	60	97.5	20
1	3	9	60	92.5	20
1	3	10	60	90	20
1	3	11	60	95	20
1	3	12	60	97.5	20
1	3	13	60	97.5	20
1	3	14	60	95	20
1	3	15	60	87.5	20
1	3	16	60	87.5	20
1	3	1	70	80	20
1	3	2	70	87.5	20
1	3	3	70	92.5	20
1	3	4	70	95	20
1	3	5	70	100	20
1	3	6	70	97.5	20
1	3	7	70	97.5	20
1	3	8	70	95	20
1	3	9	70	85	20
1	3	10	70	85	20
1	3	11	70	95	20
1	3	12	70	97.5	20
1	3	13	70	87.5	20
1	3	14	70	87.5	20
1	3	15	70	97.5	20
1	3	16	70	100	20
1	3	1	80	85	20
1	3	2	80	87.5	20
1	3	3	80	95	20
1	3	4	80	97.5	20
1	3	5	80	97.5	20
1	3	6	80	92.5	20
1	3	7	80	90	20
1	3	8	80	95	20
1	3	9	80	85	20
1	3	10	80	80	20
1	3	11	80	95	20
1	3	12	80	95	20
1	3	13	80	95	20
1	3	14	80	97.5	20
1	3	15	80	95	20
1	3	16	80	95	20
1	3	1	90	82.5	20
1	3	2	90	95	20
1	3	3	90	92.5	20
1	3	4	90	92.5	20
1	3	5	90	97.5	20
1	3	6	90	97.5	20
1	3	7	90	97.5	20
1	3	8	90	90	20
1	3	9	90	87.5	20
1	3	10	90	92.5	20
1	3	11	90	97.5	20
1	3	12	90	100	20
1	3	13	90	95	20
1	3	14	90	95	20
1	3	15	90	97.5	20
1	3	16	90	95	20
1	3	1	100	90	20
1	3	2	100	92.5	20
1	3	3	100	87.5	20
1	3	4	100	90	20
1	3	5	100	95	20
1	3	6	100	92.5	20
1	3	7	100	90	20
1	3	8	100	92.5	20
1	3	9	100	90	20
1	3	10	100	85	20
1	3	11	100	87.5	20
1	3	12	100	95	20
1	3	13	100	97.5	20
1	3	14	100	92.5	20
1	3	15	100	92.5	20
1	3	16	100	97.5	20
2	4	1	0	5	20
2	4	2	0	7.5	20
2	4	3	0	10	20
2	4	4	0	10	20
2	4	5	0	5	20
2	4	6	0	5	20
2	4	7	0	5	20
2	4	8	0	10	20
2	4	9	0	10	20
2	4	10	0	5	20
2	4	11	0	2.5	20
2	4	12	0	0	20
2	4	13	0	2.5	20
2	4	14	0	5	20
2	4	15	0	2.5	20
2	4	16	0	5	20
2	4	1	10	12.5	20
2	4	2	10	17.5	20
2	4	3	10	10	20
2	4	4	10	12.5	20
2	4	5	10	12.5	20
2	4	6	10	10	20
2	4	7	10	12.5	20
2	4	8	10	12.5	20
2	4	9	10	7.5	20
2	4	10	10	7.5	20
2	4	11	10	10	20
2	4	12	10	10	20
2	4	13	10	10	20
2	4	14	10	7.5	20
2	4	15	10	5	20
2	4	16	10	5	20
2	4	1	20	15	20
2	4	2	20	17.5	20
2	4	3	20	12.5	20
2	4	4	20	12.5	20
2	4	5	20	12.5	20
2	4	6	20	12.5	20
2	4	7	20	15	20
2	4	8	20	17.5	20
2	4	9	20	12.5	20
2	4	10	20	7.5	20
2	4	11	20	10	20
2	4	12	20	15	20
2	4	13	20	10	20
2	4	14	20	7.5	20
2	4	15	20	5	20
2	4	16	20	2.5	20
2	4	1	30	17.5	20
2	4	2	30	20	20
2	4	3	30	17.5	20
2	4	4	30	17.5	20
2	4	5	30	20	20
2	4	6	30	17.5	20
2	4	7	30	15	20
2	4	8	30	25	20
2	4	9	30	22.5	20
2	4	10	30	10	20
2	4	11	30	15	20
2	4	12	30	20	20
2	4	13	30	17.5	20
2	4	14	30	12.5	20
2	4	15	30	7.5	20
2	4	16	30	10	20
2	4	1	40	37.5	20
2	4	2	40	32.5	20
2	4	3	40	27.5	20
2	4	4	40	25	20
2	4	5	40	25	20
2	4	6	40	25	20
2	4	7	40	32.5	20
2	4	8	40	30	20
2	4	9	40	25	20
2	4	10	40	20	20
2	4	11	40	15	20
2	4	12	40	22.5	20
2	4	13	40	22.5	20
2	4	14	40	12.5	20
2	4	15	40	5	20
2	4	16	40	17.5	20
2	4	1	50	55	20
2	4	2	50	32.5	20
2	4	3	50	32.5	20
2	4	4	50	30	20
2	4	5	50	37.5	20
2	4	6	50	45	20
2	4	7	50	47.5	20
2	4	8	50	50	20
2	4	9	50	32.5	20
2	4	10	50	22.5	20
2	4	11	50	37.5	20
2	4	12	50	45	20
2	4	13	50	37.5	20
2	4	14	50	35	20
2	4	15	50	32.5	20
2	4	16	50	22.5	20
2	4	1	60	70	20
2	4	2	60	47.5	20
2	4	3	60	50	20
2	4	4	60	45	20
2	4	5	60	42.5	20
2	4	6	60	47.5	20
2	4	7	60	47.5	20
2	4	8	60	42.5	20
2	4	9	60	42.5	20
2	4	10	60	42.5	20
2	4	11	60	42.5	20
2	4	12	60	47.5	20
2	4	13	60	52.5	20
2	4	14	60	55	20
2	4	15	60	50	20
2	4	16	60	32.5	20
2	4	1	70	85	20
2	4	2	70	65	20
2	4	3	70	60	20
2	4	4	70	52.5	20
2	4	5	70	52.5	20
2	4	6	70	50	20
2	4	7	70	47.5	20
2	4	8	70	45	20
2	4	9	70	42.5	20
2	4	10	70	47.5	20
2	4	11	70	50	20
2	4	12	70	57.5	20
2	4	13	70	60	20
2	4	14	70	57.5	20
2	4	15	70	42.5	20
2	4	16	70	27.5	20
2	4	1	80	80	20
2	4	2	80	62.5	20
2	4	3	80	60	20
2	4	4	80	57.5	20
2	4	5	80	57.5	20
2	4	6	80	52.5	20
2	4	7	80	50	20
2	4	8	80	55	20
2	4	9	80	50	20
2	4	10	80	47.5	20
2	4	11	80	50	20
2	4	12	80	60	20
2	4	13	80	60	20
2	4	14	80	55	20
2	4	15	80	57.5	20
2	4	16	80	42.5	20
2	4	1	90	80	20
2	4	2	90	67.5	20
2	4	3	90	70	20
2	4	4	90	60	20
2	4	5	90	55	20
2	4	6	90	60	20
2	4	7	90	62.5	20
2	4	8	90	55	20
2	4	9	90	50	20
2	4	10	90	50	20
2	4	11	90	52.5	20
2	4	12	90	57.5	20
2	4	13	90	55	20
2	4	14	90	55	20
2	4	15	90	45	20
2	4	16	90	45	20
2	4	1	100	90	20
2	4	2	100	75	20
2	4	3	100	67.5	20
2	4	4	100	60	20
2	4	5	100	57.5	20
2	4	6	100	62.5	20
2	4	7	100	62.5	20
2	4	8	100	50	20
2	4	9	100	50	20
2	4	10	100	57.5	20
2	4	11	100	62.5	20
2	4	12	100	60	20
2	4	13	100	55	20
2	4	14	100	60	20
2	4	15	100	55	20
2	4	16	100	47.5	20
2	5	1	0	20	20
2	5	2	0	25	20
2	5	3	0	15	20
2	5	4	0	22.5	20
2	5	5	0	22.5	20
2	5	6	0	10	20
2	5	7	0	12.5	20
2	5	8	0	7.5	20
2	5	9	0	2.5	20
2	5	10	0	2.5	20
2	5	11	0	2.5	20
2	5	12	0	2.5	20
2	5	13	0	2.5	20
2	5	14	0	5	20
2	5	15	0	5	20
2	5	16	0	5	20
2	5	1	10	27.5	20
2	5	2	10	40	20
2	5	3	10	30	20
2	5	4	10	35	20
2	5	5	10	30	20
2	5	6	10	15	20
2	5	7	10	10	20
2	5	8	10	10	20
2	5	9	10	17.5	20
2	5	10	10	12.5	20
2	5	11	10	5	20
2	5	12	10	10	20
2	5	13	10	10	20
2	5	14	10	5	20
2	5	15	10	2.5	20
2	5	16	10	5	20
2	5	1	20	17.5	20
2	5	2	20	37.5	20
2	5	3	20	45	20
2	5	4	20	47.5	20
2	5	5	20	35	20
2	5	6	20	20	20
2	5	7	20	17.5	20
2	5	8	20	17.5	20
2	5	9	20	17.5	20
2	5	10	20	10	20
2	5	11	20	10	20
2	5	12	20	12.5	20
2	5	13	20	12.5	20
2	5	14	20	15	20
2	5	15	20	10	20
2	5	16	20	7.5	20
2	5	1	30	32.5	20
2	5	2	30	55	20
2	5	3	30	57.5	20
2	5	4	30	65	20
2	5	5	30	60	20
2	5	6	30	40	20
2	5	7	30	32.5	20
2	5	8	30	32.5	20
2	5	9	30	25	20
2	5	10	30	22.5	20
2	5	11	30	27.5	20
2	5	12	30	27.5	20
2	5	13	30	22.5	20
2	5	14	30	17.5	20
2	5	15	30	15	20
2	5	16	30	12.5	20
2	5	1	40	50	20
2	5	2	40	72.5	20
2	5	3	40	70	20
2	5	4	40	62.5	20
2	5	5	40	52.5	20
2	5	6	40	42.5	20
2	5	7	40	42.5	20
2	5	8	40	42.5	20
2	5	9	40	42.5	20
2	5	10	40	42.5	20
2	5	11	40	45	20
2	5	12	40	45	20
2	5	13	40	32.5	20
2	5	14	40	27.5	20
2	5	15	40	22.5	20
2	5	16	40	20	20
2	5	1	50	45	20
2	5	2	50	72.5	20
2	5	3	50	72.5	20
2	5	4	50	80	20
2	5	5	50	77.5	20
2	5	6	50	67.5	20
2	5	7	50	67.5	20
2	5	8	50	72.5	20
2	5	9	50	62.5	20
2	5	10	50	50	20
2	5	11	50	57.5	20
2	5	12	50	62.5	20
2	5	13	50	57.5	20
2	5	14	50	62.5	20
2	5	15	50	60	20
2	5	16	50	57.5	20
2	5	1	60	47.5	20
2	5	2	60	77.5	20
2	5	3	60	77.5	20
2	5	4	60	85	20
2	5	5	60	90	20
2	5	6	60	72.5	20
2	5	7	60	65	20
2	5	8	60	75	20
2	5	9	60	80	20
2	5	10	60	80	20
2	5	11	60	82.5	20
2	5	12	60	80	20
2	5	13	60	80	20
2	5	14	60	80	20
2	5	15	60	75	20
2	5	16	60	80	20
2	5	1	70	60	20
2	5	2	70	95	20
2	5	3	70	95	20
2	5	4	70	90	20
2	5	5	70	90	20
2	5	6	70	90	20
2	5	7	70	87.5	20
2	5	8	70	85	20
2	5	9	70	82.5	20
2	5	10	70	92.5	20
2	5	11	70	100	20
2	5	12	70	97.5	20
2	5	13	70	95	20
2	5	14	70	92.5	20
2	5	15	70	87.5	20
2	5	16	70	85	20
2	5	1	80	52.5	20
2	5	2	80	85	20
2	5	3	80	97.5	20
2	5	4	80	97.5	20
2	5	5	80	95	20
2	5	6	80	90	20
2	5	7	80	85	20
2	5	8	80	85	20
2	5	9	80	85	20
2	5	10	80	92.5	20
2	5	11	80	100	20
2	5	12	80	100	20
2	5	13	80	95	20
2	5	14	80	95	20
2	5	15	80	95	20
2	5	16	80	80	20
2	5	1	90	77.5	20
2	5	2	90	97.5	20
2	5	3	90	92.5	20
2	5	4	90	95	20
2	5	5	90	100	20
2	5	6	90	97.5	20
2	5	7	90	97.5	20
2	5	8	90	95	20
2	5	9	90	92.5	20
2	5	10	90	97.5	20
2	5	11	90	97.5	20
2	5	12	90	97.5	20
2	5	13	90	100	20
2	5	14	90	95	20
2	5	15	90	87.5	20
2	5	16	90	87.5	20
2	5	1	100	70	20
2	5	2	100	97.5	20
2	5	3	100	97.5	20
2	5	4	100	95	20
2	5	5	100	97.5	20
2	5	6	100	95	20
2	5	7	100	95	20
2	5	8	100	100	20
2	5	9	100	97.5	20
2	5	10	100	90	20
2	5	11	100	92.5	20
2	5	12	100	100	20
2	5	13	100	100	20
2	5	14	100	97.5	20
2	5	15	100	97.5	20
2	5	16	100	95	20
2	6	1	0	22.5	20
2	6	2	0	27.5	20
2	6	3	0	10	20
2	6	4	0	2.5	20
2	6	5	0	2.5	20
2	6	6	0	2.5	20
2	6	7	0	0	20
2	6	8	0	0	20
2	6	9	0	0	20
2	6	10	0	0	20
2	6	11	0	0	20
2	6	12	0	0	20
2	6	13	0	0	20
2	6	14	0	0	20
2	6	15	0	0	20
2	6	16	0	0	20
2	6	1	10	17.5	20
2	6	2	10	20	20
2	6	3	10	12.5	20
2	6	4	10	10	20
2	6	5	10	10	20
2	6	6	10	7.5	20
2	6	7	10	0	20
2	6	8	10	0	20
2	6	9	10	0	20
2	6	10	10	0	20
2	6	11	10	0	20
2	6	12	10	0	20
2	6	13	10	0	20
2	6	14	10	0	20
2	6	15	10	0	20
2	6	16	10	2.5	20
2	6	1	20	27.5	20
2	6	2	20	32.5	20
2	6	3	20	25	20
2	6	4	20	15	20
2	6	5	20	10	20
2	6	6	20	12.5	20
2	6	7	20	2.5	20
2	6	8	20	0	20
2	6	9	20	7.5	20
2	6	10	20	7.5	20
2	6	11	20	0	20
2	6	12	20	0	20
2	6	13	20	0	20
2	6	14	20	2.5	20
2	6	15	20	2.5	20
2	6	16	20	2.5	20
2	6	1	30	37.5	20
2	6	2	30	52.5	20
2	6	3	30	32.5	20
2	6	4	30	22.5	20
2	6	5	30	32.5	20
2	6	6	30	27.5	20
2	6	7	30	7.5	20
2	6	8	30	2.5	20
2	6	9	30	10	20
2	6	10	30	15	20
2	6	11	30	10	20
2	6	12	30	7.5	20
2	6	13	30	7.5	20
2	6	14	30	7.5	20
2	6	15	30	7.5	20
2	6	16	30	7.5	20
2	6	1	40	45	20
2	6	2	40	65	20
2	6	3	40	67.5	20
2	6	4	40	57.5	20
2	6	5	40	52.5	20
2	6	6	40	47.5	20
2	6	7	40	25	20
2	6	8	40	10	20
2	6	9	40	27.5	20
2	6	10	40	37.5	20
2	6	11	40	32.5	20
2	6	12	40	32.5	20
2	6	13	40	22.5	20
2	6	14	40	27.5	20
2	6	15	40	25	20
2	6	16	40	27.5	20
2	6	1	50	77.5	20
2	6	2	50	80	20
2	6	3	50	75	20
2	6	4	50	85	20
2	6	5	50	87.5	20
2	6	6	50	70	20
2	6	7	50	47.5	20
2	6	8	50	42.5	20
2	6	9	50	65	20
2	6	10	50	75	20
2	6	11	50	67.5	20
2	6	12	50	67.5	20
2	6	13	50	62.5	20
2	6	14	50	67.5	20
2	6	15	50	75	20
2	6	16	50	75	20
2	6	1	60	87.5	20
2	6	2	60	87.5	20
2	6	3	60	90	20
2	6	4	60	95	20
2	6	5	60	95	20
2	6	6	60	90	20
2	6	7	60	75	20
2	6	8	60	70	20
2	6	9	60	87.5	20
2	6	10	60	100	20
2	6	11	60	97.5	20
2	6	12	60	92.5	20
2	6	13	60	87.5	20
2	6	14	60	90	20
2	6	15	60	92.5	20
2	6	16	60	95	20
2	6	1	70	92.5	20
2	6	2	70	100	20
2	6	3	70	100	20
2	6	4	70	100	20
2	6	5	70	97.5	20
2	6	6	70	92.5	20
2	6	7	70	85	20
2	6	8	70	87.5	20
2	6	9	70	97.5	20
2	6	10	70	100	20
2	6	11	70	100	20
2	6	12	70	97.5	20
2	6	13	70	97.5	20
2	6	14	70	100	20
2	6	15	70	95	20
2	6	16	70	95	20
2	6	1	80	85	20
2	6	2	80	100	20
2	6	3	80	100	20
2	6	4	80	100	20
2	6	5	80	97.5	20
2	6	6	80	97.5	20
2	6	7	80	97.5	20
2	6	8	80	97.5	20
2	6	9	80	100	20
2	6	10	80	100	20
2	6	11	80	100	20
2	6	12	80	100	20
2	6	13	80	100	20
2	6	14	80	100	20
2	6	15	80	100	20
2	6	16	80	100	20
2	6	1	90	95	20
2	6	2	90	100	20
2	6	3	90	100	20
2	6	4	90	100	20
2	6	5	90	97.5	20
2	6	6	90	95	20
2	6	7	90	97.5	20
2	6	8	90	100	20
2	6	9	90	100	20
2	6	10	90	100	20
2	6	11	90	100	20
2	6	12	90	100	20
2	6	13	90	97.5	20
2	6	14	90	95	20
2	6	15	90	97.5	20
2	6	16	90	100	20
2	6	1	100	95	20
2	6	2	100	100	20
2	6	3	100	100	20
2	6	4	100	100	20
2	6	5	100	100	20
2	6	6	100	100	20
2	6	7	100	100	20
2	6	8	100	100	20
2	6	9	100	100	20
2	6	10	100	100	20
2	6	11	100	100	20
2	6	12	100	100	20
2	6	13	100	100	20
2	6	14	100	100	20
2	6	15	100	100	20
2	6	16	100	100	20
3	7	1	0	0	20
3	7	2	0	7.5	20
3	7	3	0	22.5	20
3	7	4	0	17.5	20
3	7	5	0	10	20
3	7	6	0	7.5	20
3	7	7	0	7.5	20
3	7	8	0	10	20
3	7	9	0	2.5	20
3	7	10	0	0	20
3	7	11	0	0	20
3	7	12	0	0	20
3	7	13	0	0	20
3	7	14	0	0	20
3	7	15	0	0	20
3	7	16	0	0	20
3	7	1	10	5	20
3	7	2	10	5	20
3	7	3	10	7.5	20
3	7	4	10	10	20
3	7	5	10	15	20
3	7	6	10	17.5	20
3	7	7	10	12.5	20
3	7	8	10	5	20
3	7	9	10	0	20
3	7	10	10	0	20
3	7	11	10	0	20
3	7	12	10	0	20
3	7	13	10	0	20
3	7	14	10	0	20
3	7	15	10	0	20
3	7	16	10	0	20
3	7	1	20	5	20
3	7	2	20	7.5	20
3	7	3	20	27.5	20
3	7	4	20	35	20
3	7	5	20	22.5	20
3	7	6	20	15	20
3	7	7	20	15	20
3	7	8	20	12.5	20
3	7	9	20	2.5	20
3	7	10	20	0	20
3	7	11	20	0	20
3	7	12	20	0	20
3	7	13	20	0	20
3	7	14	20	0	20
3	7	15	20	0	20
3	7	16	20	0	20
3	7	1	30	5	20
3	7	2	30	15	20
3	7	3	30	37.5	20
3	7	4	30	40	20
3	7	5	30	35	20
3	7	6	30	32.5	20
3	7	7	30	22.5	20
3	7	8	30	20	20
3	7	9	30	12.5	20
3	7	10	30	2.5	20
3	7	11	30	2.5	20
3	7	12	30	2.5	20
3	7	13	30	0	20
3	7	14	30	0	20
3	7	15	30	2.5	20
3	7	16	30	2.5	20
3	7	1	40	25	20
3	7	2	40	27.5	20
3	7	3	40	52.5	20
3	7	4	40	62.5	20
3	7	5	40	65	20
3	7	6	40	60	20
3	7	7	40	57.5	20
3	7	8	40	47.5	20
3	7	9	40	27.5	20
3	7	10	40	32.5	20
3	7	11	40	45	20
3	7	12	40	37.5	20
3	7	13	40	17.5	20
3	7	14	40	5	20
3	7	15	40	7.5	20
3	7	16	40	10	20
3	7	1	50	50	20
3	7	2	50	37.5	20
3	7	3	50	70	20
3	7	4	50	85	20
3	7	5	50	82.5	20
3	7	6	50	82.5	20
3	7	7	50	72.5	20
3	7	8	50	70	20
3	7	9	50	72.5	20
3	7	10	50	80	20
3	7	11	50	80	20
3	7	12	50	70	20
3	7	13	50	55	20
3	7	14	50	35	20
3	7	15	50	27.5	20
3	7	16	50	27.5	20
3	7	1	60	72.5	20
3	7	2	60	57.5	20
3	7	3	60	82.5	20
3	7	4	60	90	20
3	7	5	60	82.5	20
3	7	6	60	82.5	20
3	7	7	60	90	20
3	7	8	60	92.5	20
3	7	9	60	90	20
3	7	10	60	95	20
3	7	11	60	100	20
3	7	12	60	100	20
3	7	13	60	80	20
3	7	14	60	60	20
3	7	15	60	67.5	20
3	7	16	60	62.5	20
3	7	1	70	92.5	20
3	7	2	70	80	20
3	7	3	70	87.5	20
3	7	4	70	95	20
3	7	5	70	90	20
3	7	6	70	87.5	20
3	7	7	70	87.5	20
3	7	8	70	85	20
3	7	9	70	90	20
3	7	10	70	100	20
3	7	11	70	100	20
3	7	12	70	100	20
3	7	13	70	82.5	20
3	7	14	70	77.5	20
3	7	15	70	82.5	20
3	7	16	70	72.5	20
3	7	1	80	97.5	20
3	7	2	80	87.5	20
3	7	3	80	85	20
3	7	4	80	90	20
3	7	5	80	90	20
3	7	6	80	82.5	20
3	7	7	80	87.5	20
3	7	8	80	95	20
3	7	9	80	90	20
3	7	10	80	95	20
3	7	11	80	100	20
3	7	12	80	100	20
3	7	13	80	87.5	20
3	7	14	80	80	20
3	7	15	80	82.5	20
3	7	16	80	85	20
3	7	1	90	90	20
3	7	2	90	82.5	20
3	7	3	90	90	20
3	7	4	90	87.5	20
3	7	5	90	82.5	20
3	7	6	90	85	20
3	7	7	90	92.5	20
3	7	8	90	97.5	20
3	7	9	90	95	20
3	7	10	90	97.5	20
3	7	11	90	100	20
3	7	12	90	100	20
3	7	13	90	92.5	20
3	7	14	90	85	20
3	7	15	90	85	20
3	7	16	90	85	20
3	7	1	100	97.5	20
3	7	2	100	82.5	20
3	7	3	100	85	20
3	7	4	100	95	20
3	7	5	100	87.5	20
3	7	6	100	77.5	20
3	7	7	100	85	20
3	7	8	100	95	20
3	7	9	100	95	20
3	7	10	100	100	20
3	7	11	100	97.5	20
3	7	12	100	95	20
3	7	13	100	87.5	20
3	7	14	100	82.5	20
3	7	15	100	80	20
3	7	16	100	77.5	20
3	8	1	0	0	20
3	8	2	0	0	20
3	8	3	0	10	20
3	8	4	0	10	20
3	8	5	0	0	20
3	8	6	0	0	20
3	8	7	0	0	20
3	8	8	0	0	20
3	8	9	0	0	20
3	8	10	0	0	20
3	8	11	0	0	20
3	8	12	0	0	20
3	8	13	0	0	20
3	8	14	0	2.5	20
3	8	15	0	2.5	20
3	8	16	0	0	20
3	8	1	10	0	20
3	8	2	10	0	20
3	8	3	10	2.5	20
3	8	4	10	5	20
3	8	5	10	5	20
3	8	6	10	10	20
3	8	7	10	12.5	20
3	8	8	10	5	20
3	8	9	10	0	20
3	8	10	10	0	20
3	8	11	10	0	20
3	8	12	10	0	20
3	8	13	10	0	20
3	8	14	10	0	20
3	8	15	10	0	20
3	8	16	10	0	20
3	8	1	20	0	20
3	8	2	20	0	20
3	8	3	20	2.5	20
3	8	4	20	7.5	20
3	8	5	20	7.5	20
3	8	6	20	5	20
3	8	7	20	5	20
3	8	8	20	2.5	20
3	8	9	20	0	20
3	8	10	20	0	20
3	8	11	20	0	20
3	8	12	20	0	20
3	8	13	20	0	20
3	8	14	20	0	20
3	8	15	20	0	20
3	8	16	20	0	20
3	8	1	30	0	20
3	8	2	30	2.5	20
3	8	3	30	5	20
3	8	4	30	12.5	20
3	8	5	30	12.5	20
3	8	6	30	15	20
3	8	7	30	22.5	20
3	8	8	30	15	20
3	8	9	30	10	20
3	8	10	30	10	20
3	8	11	30	7.5	20
3	8	12	30	10	20
3	8	13	30	7.5	20
3	8	14	30	2.5	20
3	8	15	30	5	20
3	8	16	30	2.5	20
3	8	1	40	10	20
3	8	2	40	15	20
3	8	3	40	27.5	20
3	8	4	40	27.5	20
3	8	5	40	22.5	20
3	8	6	40	37.5	20
3	8	7	40	47.5	20
3	8	8	40	45	20
3	8	9	40	35	20
3	8	10	40	25	20
3	8	11	40	22.5	20
3	8	12	40	20	20
3	8	13	40	22.5	20
3	8	14	40	22.5	20
3	8	15	40	20	20
3	8	16	40	22.5	20
3	8	1	50	22.5	20
3	8	2	50	30	20
3	8	3	50	42.5	20
3	8	4	50	45	20
3	8	5	50	57.5	20
3	8	6	50	75	20
3	8	7	50	85	20
3	8	8	50	80	20
3	8	9	50	62.5	20
3	8	10	50	62.5	20
3	8	11	50	82.5	20
3	8	12	50	80	20
3	8	13	50	72.5	20
3	8	14	50	67.5	20
3	8	15	50	70	20
3	8	16	50	75	20
3	8	1	60	47.5	20
3	8	2	60	57.5	20
3	8	3	60	65	20
3	8	4	60	72.5	20
3	8	5	60	82.5	20
3	8	6	60	85	20
3	8	7	60	87.5	20
3	8	8	60	90	20
3	8	9	60	95	20
3	8	10	60	97.5	20
3	8	11	60	100	20
3	8	12	60	97.5	20
3	8	13	60	95	20
3	8	14	60	97.5	20
3	8	15	60	97.5	20
3	8	16	60	97.5	20
3	8	1	70	77.5	20
3	8	2	70	85	20
3	8	3	70	77.5	20
3	8	4	70	77.5	20
3	8	5	70	85	20
3	8	6	70	92.5	20
3	8	7	70	97.5	20
3	8	8	70	97.5	20
3	8	9	70	100	20
3	8	10	70	100	20
3	8	11	70	100	20
3	8	12	70	100	20
3	8	13	70	100	20
3	8	14	70	97.5	20
3	8	15	70	97.5	20
3	8	16	70	100	20
3	8	1	80	90	20
3	8	2	80	92.5	20
3	8	3	80	85	20
3	8	4	80	85	20
3	8	5	80	95	20
3	8	6	80	97.5	20
3	8	7	80	97.5	20
3	8	8	80	97.5	20
3	8	9	80	100	20
3	8	10	80	100	20
3	8	11	80	100	20
3	8	12	80	97.5	20
3	8	13	80	97.5	20
3	8	14	80	100	20
3	8	15	80	100	20
3	8	16	80	97.5	20
3	8	1	90	90	20
3	8	2	90	95	20
3	8	3	90	90	20
3	8	4	90	92.5	20
3	8	5	90	100	20
3	8	6	90	97.5	20
3	8	7	90	95	20
3	8	8	90	97.5	20
3	8	9	90	100	20
3	8	10	90	100	20
3	8	11	90	97.5	20
3	8	12	90	97.5	20
3	8	13	90	100	20
3	8	14	90	100	20
3	8	15	90	100	20
3	8	16	90	100	20
3	8	1	100	87.5	20
3	8	2	100	97.5	20
3	8	3	100	95	20
3	8	4	100	95	20
3	8	5	100	100	20
3	8	6	100	100	20
3	8	7	100	100	20
3	8	8	100	100	20
3	8	9	100	100	20
3	8	10	100	100	20
3	8	11	100	97.5	20
3	8	12	100	97.5	20
3	8	13	100	100	20
3	8	14	100	97.5	20
3	8	15	100	97.5	20
3	8	16	100	100	20
3	9	1	0	0	20
3	9	2	0	0	20
3	9	3	0	0	20
3	9	4	0	0	20
3	9	5	0	0	20
3	9	6	0	0	20
3	9	7	0	2.5	20
3	9	8	0	2.5	20
3	9	9	0	0	20
3	9	10	0	0	20
3	9	11	0	0	20
3	9	12	0	0	20
3	9	13	0	0	20
3	9	14	0	0	20
3	9	15	0	2.5	20
3	9	16	0	2.5	20
3	9	1	10	0	20
3	9	2	10	0	20
3	9	3	10	0	20
3	9	4	10	0	20
3	9	5	10	0	20
3	9	6	10	2.5	20
3	9	7	10	2.5	20
3	9	8	10	0	20
3	9	9	10	0	20
3	9	10	10	0	20
3	9	11	10	0	20
3	9	12	10	0	20
3	9	13	10	0	20
3	9	14	10	0	20
3	9	15	10	0	20
3	9	16	10	0	20
3	9	1	20	0	20
3	9	2	20	0	20
3	9	3	20	0	20
3	9	4	20	0	20
3	9	5	20	0	20
3	9	6	20	5	20
3	9	7	20	5	20
3	9	8	20	0	20
3	9	9	20	0	20
3	9	10	20	0	20
3	9	11	20	0	20
3	9	12	20	0	20
3	9	13	20	0	20
3	9	14	20	0	20
3	9	15	20	0	20
3	9	16	20	0	20
3	9	1	30	0	20
3	9	2	30	0	20
3	9	3	30	2.5	20
3	9	4	30	7.5	20
3	9	5	30	12.5	20
3	9	6	30	7.5	20
3	9	7	30	2.5	20
3	9	8	30	5	20
3	9	9	30	2.5	20
3	9	10	30	2.5	20
3	9	11	30	2.5	20
3	9	12	30	0	20
3	9	13	30	0	20
3	9	14	30	0	20
3	9	15	30	2.5	20
3	9	16	30	5	20
3	9	1	40	15	20
3	9	2	40	5	20
3	9	3	40	17.5	20
3	9	4	40	25	20
3	9	5	40	30	20
3	9	6	40	45	20
3	9	7	40	45	20
3	9	8	40	35	20
3	9	9	40	27.5	20
3	9	10	40	25	20
3	9	11	40	12.5	20
3	9	12	40	10	20
3	9	13	40	17.5	20
3	9	14	40	12.5	20
3	9	15	40	15	20
3	9	16	40	20	20
3	9	1	50	50	20
3	9	2	50	32.5	20
3	9	3	50	47.5	20
3	9	4	50	55	20
3	9	5	50	60	20
3	9	6	50	67.5	20
3	9	7	50	67.5	20
3	9	8	50	75	20
3	9	9	50	75	20
3	9	10	50	65	20
3	9	11	50	55	20
3	9	12	50	57.5	20
3	9	13	50	42.5	20
3	9	14	50	32.5	20
3	9	15	50	47.5	20
3	9	16	50	47.5	20
3	9	1	60	75	20
3	9	2	60	55	20
3	9	3	60	60	20
3	9	4	60	65	20
3	9	5	60	82.5	20
3	9	6	60	95	20
3	9	7	60	95	20
3	9	8	60	97.5	20
3	9	9	60	95	20
3	9	10	60	92.5	20
3	9	11	60	92.5	20
3	9	12	60	92.5	20
3	9	13	60	82.5	20
3	9	14	60	60	20
3	9	15	60	70	20
3	9	16	60	90	20
3	9	1	70	77.5	20
3	9	2	70	72.5	20
3	9	3	70	85	20
3	9	4	70	87.5	20
3	9	5	70	97.5	20
3	9	6	70	100	20
3	9	7	70	100	20
3	9	8	70	97.5	20
3	9	9	70	97.5	20
3	9	10	70	97.5	20
3	9	11	70	97.5	20
3	9	12	70	100	20
3	9	13	70	100	20
3	9	14	70	77.5	20
3	9	15	70	75	20
3	9	16	70	97.5	20
3	9	1	80	90	20
3	9	2	80	85	20
3	9	3	80	90	20
3	9	4	80	95	20
3	9	5	80	97.5	20
3	9	6	80	97.5	20
3	9	7	80	97.5	20
3	9	8	80	100	20
3	9	9	80	100	20
3	9	10	80	100	20
3	9	11	80	100	20
3	9	12	80	100	20
3	9	13	80	100	20
3	9	14	80	82.5	20
3	9	15	80	82.5	20
3	9	16	80	100	20
3	9	1	90	95	20
3	9	2	90	92.5	20
3	9	3	90	92.5	20
3	9	4	90	95	20
3	9	5	90	97.5	20
3	9	6	90	97.5	20
3	9	7	90	97.5	20
3	9	8	90	97.5	20
3	9	9	90	97.5	20
3	9	10	90	95	20
3	9	11	90	95	20
3	9	12	90	97.5	20
3	9	13	90	100	20
3	9	14	90	85	20
3	9	15	90	85	20
3	9	16	90	100	20
3	9	1	100	97.5	20
3	9	2	100	97.5	20
3	9	3	100	95	20
3	9	4	100	95	20
3	9	5	100	100	20
3	9	6	100	100	20
3	9	7	100	100	20
3	9	8	100	100	20
3	9	9	100	97.5	20
3	9	10	100	95	20
3	9	11	100	97.5	20
3	9	12	100	92.5	20
3	9	13	100	92.5	20
3	9	14	100	92.5	20
3	9	15	100	92.5	20
3	9	16	100	100	20
