# Supplementary material for: Perceptual processing in the ventral visual stream requires area TE but not rhinal cortex
Source: eLife. 2018 Oct 12;7:e36310. doi: 10.7554/eLife.36310 (PMC6207425; doi:10.7554/eLife.36310)
Supplement: Figure 3—source data 1. [file elife-36310-fig3-data1.xlsx]

## Sheet: exp 2 (2)
Treatment group	monkey ID	session #	morph_level(%)	pct.rog	weight (# of trials per session)	rt.rog	rt.ror		Data used to produce figures in the paper: Perceptual processing in the ventral visual stream requires area TE but not rhinal cortex Authors: Mark A. G. Eldridge1*, Narihisa Matsumoto2, John H. Wittig3, Evan C. Masseau1, Richard C. Saunders1, Barry J. Richmond1* 6/4/2018
1	1	1	0	0	20		611.575		Column 1 ('Treatment group') indicates treatment type: 1 = control, 2 = TE lesion, 3 = Rh lesion.
1	1	2	0	0	20		611.575
1	1	3	0	0	20		560.125
1	1	4	0	0	20		560.125
1	1	5	0	0	20		557.575
1	1	6	0	0	20		557.575
1	1	7	0	0	20		566.1
1	1	8	0	0	20		566.1
1	1	9	0	0	20		543.825
1	1	10	0	0	20		543.825
1	1	11	0	0	20		561.475
1	1	12	0	0	20		561.475
1	1	13	0	0	20		552.1
1	1	14	0	0	20		552.1
1	1	15	0	0	20		544.575
1	1	16	0	0	20		544.575
1	1	17	0	0	20		543.175
1	1	18	0	0	20		543.175
1	1	19	0	0	20		586.525
1	1	20	0	0	20		586.525
1	1	1	25	0	20		659.825
1	1	2	25	0	20		659.825
1	1	3	25	0	20		603.35
1	1	4	25	0	20		603.35
1	1	5	25	0	20		608.125
1	1	6	25	0	20		608.125
1	1	7	25	0	20		596.15
1	1	8	25	0	20		596.15
1	1	9	25	0	20		559.825
1	1	10	25	0	20		559.825
1	1	11	25	0	20		581.2
1	1	12	25	0	20		581.2
1	1	13	25	0	20		573.3
1	1	14	25	0	20		573.3
1	1	15	25	0	20		568.85
1	1	16	25	0	20		568.85
1	1	17	25	0	20		556.225
1	1	18	25	0	20		556.225
1	1	19	25	0	20		591.875
1	1	20	25	0	20		591.875
1	1	1	35	0	20		757.35
1	1	2	35	0	20		757.35
1	1	3	35	5	20	356	659.692
1	1	4	35	0	20	356	659.692
1	1	5	35	0	20	418	681.949
1	1	6	35	5	20	418	681.949
1	1	7	35	0	20		653.375
1	1	8	35	0	20		653.375
1	1	9	35	0	20		604.2
1	1	10	35	0	20		604.2
1	1	11	35	5	20	335	598.077
1	1	12	35	0	20	335	598.077
1	1	13	35	0	20		619.85
1	1	14	35	0	20		619.85
1	1	15	35	0	20		628.975
1	1	16	35	0	20		628.975
1	1	17	35	0	20		580.8
1	1	18	35	0	20		580.8
1	1	19	35	0	20		626.775
1	1	20	35	0	20		626.775
1	1	1	40	15	20	488.333	780.853
1	1	2	40	15	20	488.333	780.853
1	1	3	40	20	20	433.4	762.686
1	1	4	40	5	20	433.4	762.686
1	1	5	40	5	20	437	667.579
1	1	6	40	5	20	437	667.579
1	1	7	40	0	20		708.75
1	1	8	40	0	20		708.75
1	1	9	40	0	20	374	692.868
1	1	10	40	10	20	374	692.868
1	1	11	40	10	20	379.5	646.342
1	1	12	40	0	20	379.5	646.342
1	1	13	40	5	20	396	642.526
1	1	14	40	5	20	396	642.526
1	1	15	40	0	20		604.275
1	1	16	40	0	20		604.275
1	1	17	40	0	20	680	604.641
1	1	18	40	5	20	680	604.641
1	1	19	40	0	20		617.275
1	1	20	40	0	20		617.275
1	1	1	45	20	20	436.667	860.893
1	1	2	45	40	20	436.667	860.893
1	1	3	45	20	20	445	840.3
1	1	4	45	30	20	445	840.3
1	1	5	45	25	20	382.875	830.625
1	1	6	45	15	20	382.875	830.625
1	1	7	45	40	20	419.692	780.407
1	1	8	45	25	20	419.692	780.407
1	1	9	45	35	20	407.143	811.885
1	1	10	45	35	20	407.143	811.885
1	1	11	45	20	20	425.833	821.824
1	1	12	45	10	20	425.833	821.824
1	1	13	45	20	20	451.667	758.152
1	1	14	45	10	20	451.667	758.152
1	1	15	45	5	20	400	700.895
1	1	16	45	5	20	400	700.895
1	1	17	45	5	20	433	685.795
1	1	18	45	0	20	433	685.795
1	1	19	45	0	20	442	675.789
1	1	20	45	10	20	442	675.789
1	1	1	50	65	20	399.692	1064.36
1	1	2	50	65	20	399.692	1064.36
1	1	3	50	60	20	467.636	863.167
1	1	4	50	50	20	467.636	863.167
1	1	5	50	45	20	393.3	832.4
1	1	6	50	55	20	393.3	832.4
1	1	7	50	55	20	418.208	863.312
1	1	8	50	65	20	418.208	863.312
1	1	9	50	55	20	405.375	913.75
1	1	10	50	65	20	405.375	913.75
1	1	11	50	75	20	386.103	771.727
1	1	12	50	70	20	386.103	771.727
1	1	13	50	55	20	436.857	888.211
1	1	14	50	50	20	436.857	888.211
1	1	15	50	50	20	399.812	827.875
1	1	16	50	30	20	399.812	827.875
1	1	17	50	25	20	382.933	887.84
1	1	18	50	50	20	382.933	887.84
1	1	19	50	20	20	423.615	733.407
1	1	20	50	45	20	423.615	733.407
1	1	1	55	60	20	394.5	1068
1	1	2	55	90	20	394.5	1068
1	1	3	55	70	20	408.161	858.889
1	1	4	55	85	20	408.161	858.889
1	1	5	55	85	20	373.257	871.4
1	1	6	55	90	20	373.257	871.4
1	1	7	55	90	20	380.382	771.167
1	1	8	55	80	20	380.382	771.167
1	1	9	55	95	20	371.114	823
1	1	10	55	80	20	371.114	823
1	1	11	55	85	20	369.529	800.333
1	1	12	55	85	20	369.529	800.333
1	1	13	55	85	20	395.152	711.667
1	1	14	55	80	20	395.152	711.667
1	1	15	55	75	20	391.267	741.4
1	1	16	55	75	20	391.267	741.4
1	1	17	55	60	20	384.964	824.833
1	1	18	55	80	20	384.964	824.833
1	1	19	55	65	20	391.967	649.9
1	1	20	55	85	20	391.967	649.9
1	1	1	60	85	20	356.444	812.25
1	1	2	60	95	20	356.444	812.25
1	1	3	60	85	20	405.639	706.667
1	1	4	60	95	20	405.639	706.667
1	1	5	60	95	20	367.211	516
1	1	6	60	95	20	367.211	516
1	1	7	60	95	20	382.447	510.5
1	1	8	60	95	20	382.447	510.5
1	1	9	60	95	20	368.842	472.5
1	1	10	60	95	20	368.842	472.5
1	1	11	60	95	20	352.737	472
1	1	12	60	95	20	352.737	472
1	1	13	60	95	20	388.278	648.5
1	1	14	60	85	20	388.278	648.5
1	1	15	60	80	20	390.457	1037
1	1	16	60	95	20	390.457	1037
1	1	17	60	80	20	361.571	793
1	1	18	60	95	20	361.571	793
1	1	19	60	80	20	410.324	653.833
1	1	20	60	90	20	410.324	653.833
1	1	1	65	90	20	350.568	1070.67
1	1	2	65	95	20	350.568	1070.67
1	1	3	65	95	20	388.789	519.5
1	1	4	65	95	20	388.789	519.5
1	1	5	65	95	20	355.184	484
1	1	6	65	95	20	355.184	484
1	1	7	65	95	20	363.316	493
1	1	8	65	95	20	363.316	493
1	1	9	65	95	20	368.605	489.5
1	1	10	65	95	20	368.605	489.5
1	1	11	65	95	20	352.816	525
1	1	12	65	95	20	352.816	525
1	1	13	65	95	20	364.632	492
1	1	14	65	95	20	364.632	492
1	1	15	65	95	20	369.553	741
1	1	16	65	95	20	369.553	741
1	1	17	65	95	20	358.632	505
1	1	18	65	95	20	358.632	505
1	1	19	65	90	20	411.676	538
1	1	20	65	95	20	411.676	538
1	1	1	75	95	20	353.789	533.5
1	1	2	75	95	20	353.789	533.5
1	1	3	75	95	20	395.684	508
1	1	4	75	95	20	395.684	508
1	1	5	75	95	20	351.368	640
1	1	6	75	95	20	351.368	640
1	1	7	75	95	20	358.053	492
1	1	8	75	95	20	358.053	492
1	1	9	75	95	20	346.868	446.5
1	1	10	75	95	20	346.868	446.5
1	1	11	75	95	20	355.5	477
1	1	12	75	95	20	355.5	477
1	1	13	75	95	20	365.211	487
1	1	14	75	95	20	365.211	487
1	1	15	75	95	20	363.974	502
1	1	16	75	95	20	363.974	502
1	1	17	75	95	20	349.026	563
1	1	18	75	95	20	349.026	563
1	1	19	75	95	20	402.553	530
1	1	20	75	95	20	402.553	530
1	1	1	100	95	20	343.026	524.5
1	1	2	100	95	20	343.026	524.5
1	1	3	100	95	20	380.658	550
1	1	4	100	95	20	380.658	550
1	1	5	100	95	20	350.789	501
1	1	6	100	95	20	350.789	501
1	1	7	100	95	20	366.368	503
1	1	8	100	95	20	366.368	503
1	1	9	100	95	20	344.711	487
1	1	10	100	95	20	344.711	487
1	1	11	100	95	20	345.395	493
1	1	12	100	95	20	345.395	493
1	1	13	100	90	20	367.583	509.5
1	1	14	100	90	20	367.583	509.5
1	1	15	100	95	20	349.711	492.5
1	1	16	100	95	20	349.711	492.5
1	1	17	100	95	20	349.421	482
1	1	18	100	95	20	349.421	482
1	1	19	100	95	20	388	504
1	1	20	100	95	20	388	504
1	2	1	0	0	20		685.325
1	2	2	0	0	20		685.325
1	2	3	0	0	20	889	661.763
1	2	4	0	5	20	889	661.763
1	2	5	0	0	20		735.9
1	2	6	0	0	20		735.9
1	2	7	0	0	20		697.525
1	2	8	0	0	20		697.525
1	2	9	0	0	20		805.225
1	2	10	0	0	20		805.225
1	2	11	0	0	20		669.575
1	2	12	0	0	20		669.575
1	2	13	0	0	20		636.4
1	2	14	0	0	20		636.4
1	2	15	0	5	20	395	618.385
1	2	16	0	0	20	395	618.385
1	2	17	0	0	20		696.05
1	2	18	0	0	20		696.05
1	2	19	0	0	20		616.45
1	2	20	0	0	20		616.45
1	2	1	25	0	20		749.4
1	2	2	25	0	20		749.4
1	2	3	25	0	20		685.256
1	2	4	25	0	20		685.256
1	2	5	25	0	20		631.725
1	2	6	25	0	20		631.725
1	2	7	25	0	20		704.897
1	2	8	25	0	20		704.897
1	2	9	25	0	20		813.55
1	2	10	25	0	20		813.55
1	2	11	25	5	20	434	697.333
1	2	12	25	0	20	434	697.333
1	2	13	25	0	20		682.375
1	2	14	25	0	20		682.375
1	2	15	25	0	20		638.075
1	2	16	25	0	20		638.075
1	2	17	25	0	20		755.6
1	2	18	25	0	20		755.6
1	2	19	25	0	20		665.667
1	2	20	25	0	20		665.667
1	2	1	35	5	20	377.5	908.474
1	2	2	35	5	20	377.5	908.474
1	2	3	35	5	20	340	717.564
1	2	4	35	0	20	340	717.564
1	2	5	35	0	20		727.875
1	2	6	35	0	20		727.875
1	2	7	35	0	20		761.925
1	2	8	35	0	20		761.925
1	2	9	35	5	20	417	925.447
1	2	10	35	0	20	417	925.447
1	2	11	35	0	20		816.85
1	2	12	35	0	20		816.85
1	2	13	35	5	20	483.5	740.368
1	2	14	35	5	20	483.5	740.368
1	2	15	35	0	20		688.825
1	2	16	35	0	20		688.825
1	2	17	35	0	20		769.825
1	2	18	35	0	20		769.825
1	2	19	35	0	20		689.275
1	2	20	35	0	20		689.275
1	2	1	40	25	20	381.143	997.906
1	2	2	40	10	20	381.143	997.906
1	2	3	40	15	20	344.143	842.758
1	2	4	40	20	20	344.143	842.758
1	2	5	40	15	20	348	815.939
1	2	6	40	15	20	348	815.939
1	2	7	40	5	20	373	792.947
1	2	8	40	5	20	373	792.947
1	2	9	40	5	20	456.2	1015.51
1	2	10	40	20	20	456.2	1015.51
1	2	11	40	10	20	552.4	898.143
1	2	12	40	15	20	552.4	898.143
1	2	13	40	15	20	395.667	889.432
1	2	14	40	0	20	395.667	889.432
1	2	15	40	0	20		776.25
1	2	16	40	0	20		776.25
1	2	17	40	15	20	411.5	908.583
1	2	18	40	5	20	411.5	908.583
1	2	19	40	10	20	384	863.086
1	2	20	40	15	20	384	863.086
1	2	1	45	70	20	403.773	1336.33
1	2	2	45	40	20	403.773	1336.33
1	2	3	45	45	20	356.312	970.083
1	2	4	45	35	20	356.312	970.083
1	2	5	45	35	20	341.529	953.13
1	2	6	45	50	20	341.529	953.13
1	2	7	45	45	20	360.333	908.6
1	2	8	45	30	20	360.333	908.6
1	2	9	45	50	20	445.409	1179.47
1	2	10	45	60	20	445.409	1179.47
1	2	11	45	45	20	435.8	1098.25
1	2	12	45	55	20	435.8	1098.25
1	2	13	45	45	20	436.733	938.292
1	2	14	45	30	20	436.733	938.292
1	2	15	45	35	20	359.2	889.034
1	2	16	45	15	20	359.2	889.034
1	2	17	45	45	20	402.231	1076.48
1	2	18	45	20	20	402.231	1076.48
1	2	19	45	40	20	385.857	1018.15
1	2	20	45	30	20	385.857	1018.15
1	2	1	50	95	20	396.297	1242.67
1	2	2	50	90	20	396.297	1242.67
1	2	3	50	85	20	355.595	982
1	2	4	50	100	20	355.595	982
1	2	5	50	75	20	365.147	1321
1	2	6	50	95	20	365.147	1321
1	2	7	50	65	20	375.067	1205.2
1	2	8	50	85	20	375.067	1205.2
1	2	9	50	90	20	447.514	1380.6
1	2	10	50	85	20	447.514	1380.6
1	2	11	50	85	20	437.438	1032.25
1	2	12	50	75	20	437.438	1032.25
1	2	13	50	85	20	376.25	927
1	2	14	50	75	20	376.25	927
1	2	15	50	80	20	385.321	1047.08
1	2	16	50	60	20	385.321	1047.08
1	2	17	50	85	20	412.424	879.429
1	2	18	50	80	20	412.424	879.429
1	2	19	50	85	20	396.344	1073.57
1	2	20	50	75	20	396.344	1073.57
1	2	1	55	100	20	420.028	1607.33
1	2	2	55	80	20	420.028	1607.33
1	2	3	55	100	20	367.949	2712
1	2	4	55	95	20	367.949	2712
1	2	5	55	85	20	351.973	1970.5
1	2	6	55	100	20	351.973	1970.5
1	2	7	55	90	20	369.784	885
1	2	8	55	95	20	369.784	885
1	2	9	55	100	20	436.325
1	2	10	55	100	20	436.325
1	2	11	55	95	20	429.421	2227.5
1	2	12	55	95	20	429.421	2227.5
1	2	13	55	90	20	372.973	978.667
1	2	14	55	95	20	372.973	978.667
1	2	15	55	95	20	386.605	910.5
1	2	16	55	95	20	386.605	910.5
1	2	17	55	95	20	404.921	2086
1	2	18	55	95	20	404.921	2086
1	2	19	55	90	20	374.378	1924.5
1	2	20	55	95	20	374.378	1924.5
1	2	1	60	100	20	411.975
1	2	2	60	100	20	411.975
1	2	3	60	90	20	355.946	1928.5
1	2	4	60	95	20	355.946	1928.5
1	2	5	60	100	20	356.5
1	2	6	60	100	20	356.5
1	2	7	60	95	20	395.949	2736
1	2	8	60	100	20	395.949	2736
1	2	9	60	100	20	441.85
1	2	10	60	100	20	441.85
1	2	11	60	100	20	416.15
1	2	12	60	100	20	416.15
1	2	13	60	95	20	392.737
1	2	14	60	95	20	392.737
1	2	15	60	100	20	389.65
1	2	16	60	100	20	389.65
1	2	17	60	95	20	406.103	1971
1	2	18	60	100	20	406.103	1971
1	2	19	60	100	20	414.974
1	2	20	60	95	20	414.974
1	2	1	65	90	20	423.868
1	2	2	65	100	20	423.868
1	2	3	65	95	20	378.744
1	2	4	65	100	20	378.744
1	2	5	65	100	20	361.55
1	2	6	65	100	20	361.55
1	2	7	65	100	20	392.45
1	2	8	65	100	20	392.45
1	2	9	65	100	20	448.333	3180
1	2	10	65	95	20	448.333	3180
1	2	11	65	100	20	441.256
1	2	12	65	95	20	441.256
1	2	13	65	100	20	386.95
1	2	14	65	100	20	386.95
1	2	15	65	95	20	386.641	2814
1	2	16	65	100	20	386.641	2814
1	2	17	65	100	20	406.077
1	2	18	65	95	20	406.077
1	2	19	65	95	20	377.821
1	2	20	65	100	20	377.821
1	2	1	75	90	20	403.447
1	2	2	75	100	20	403.447
1	2	3	75	100	20	364.15
1	2	4	75	100	20	364.15
1	2	5	75	100	20	377.3
1	2	6	75	100	20	377.3
1	2	7	75	100	20	400.625
1	2	8	75	100	20	400.625
1	2	9	75	100	20	467.811	564
1	2	10	75	85	20	467.811	564
1	2	11	75	100	20	452.025
1	2	12	75	100	20	452.025
1	2	13	75	95	20	408.184	3476
1	2	14	75	95	20	408.184	3476
1	2	15	75	100	20	397.436	3499
1	2	16	75	95	20	397.436	3499
1	2	17	75	100	20	429.025
1	2	18	75	100	20	429.025
1	2	19	75	100	20	379.649	3083
1	2	20	75	85	20	379.649	3083
1	2	1	100	100	20	439
1	2	2	100	100	20	439
1	2	3	100	95	20	376.184	2509
1	2	4	100	95	20	376.184	2509
1	2	5	100	100	20	366.1
1	2	6	100	100	20	366.1
1	2	7	100	100	20	400.975
1	2	8	100	100	20	400.975
1	2	9	100	100	20	443.175
1	2	10	100	100	20	443.175
1	2	11	100	100	20	448.275
1	2	12	100	100	20	448.275
1	2	13	100	100	20	399.375
1	2	14	100	100	20	399.375
1	2	15	100	100	20	396.45
1	2	16	100	100	20	396.45
1	2	17	100	100	20	431.718	387
1	2	18	100	95	20	431.718	387
1	2	19	100	100	20	414.25
1	2	20	100	100	20	414.25
1	3	1	0	0	20		858.375
1	3	2	0	0	20		858.375
1	3	3	0	0	20		822.95
1	3	4	0	0	20		822.95
1	3	5	0	0	20		759.7
1	3	6	0	0	20		759.7
1	3	7	0	0	20		748.075
1	3	8	0	0	20		748.075
1	3	9	0	0	20		662.475
1	3	10	0	0	20		662.475
1	3	11	0	0	20		643.3
1	3	12	0	0	20		643.3
1	3	13	0	0	20		643.7
1	3	14	0	0	20		643.7
1	3	15	0	0	20		780.974
1	3	16	0	0	20		780.974
1	3	17	0	0	20		714.625
1	3	18	0	0	20		714.625
1	3	19	0	0	20		578.359
1	3	20	0	0	20		578.359
1	3	1	25	0	20		807.3
1	3	2	25	0	20		807.3
1	3	3	25	0	20		766.325
1	3	4	25	0	20		766.325
1	3	5	25	0	20		753.525
1	3	6	25	0	20		753.525
1	3	7	25	0	20		843.675
1	3	8	25	0	20		843.675
1	3	9	25	0	20		760.9
1	3	10	25	0	20		760.9
1	3	11	25	0	20		714.333
1	3	12	25	0	20		714.333
1	3	13	25	0	20		670.525
1	3	14	25	0	20		670.525
1	3	15	25	0	20		1000.5
1	3	16	25	0	20		1000.5
1	3	17	25	0	20		619.579
1	3	18	25	0	20		619.579
1	3	19	25	0	20		628.65
1	3	20	25	0	20		628.65
1	3	1	35	10	20	448	959.216
1	3	2	35	5	20	448	959.216
1	3	3	35	5	20	470	896.051
1	3	4	35	0	20	470	896.051
1	3	5	35	0	20		1000.88
1	3	6	35	0	20		1000.88
1	3	7	35	5	20	444	929.205
1	3	8	35	0	20	444	929.205
1	3	9	35	5	20	548	789
1	3	10	35	0	20	548	789
1	3	11	35	0	20		751.487
1	3	12	35	0	20		751.487
1	3	13	35	0	20		719.075
1	3	14	35	0	20		719.075
1	3	15	35	5	20	458	923.359
1	3	16	35	0	20	458	923.359
1	3	17	35	0	20		750.5
1	3	18	35	0	20		750.5
1	3	19	35	0	20		673.725
1	3	20	35	0	20		673.725
1	3	1	40	25	20	432.333	998.467
1	3	2	40	20	20	432.333	998.467
1	3	3	40	30	20	507.3	1117.67
1	3	4	40	20	20	507.3	1117.67
1	3	5	40	25	20	534	1108.53
1	3	6	40	15	20	534	1108.53
1	3	7	40	5	20	806	1064.94
1	3	8	40	5	20	806	1064.94
1	3	9	40	5	20	512.5	949.368
1	3	10	40	5	20	512.5	949.368
1	3	11	40	15	20	529.5	758.083
1	3	12	40	5	20	529.5	758.083
1	3	13	40	5	20	518.5	919.632
1	3	14	40	5	20	518.5	919.632
1	3	15	40	5	20	448	1055.35
1	3	16	40	5	20	448	1055.35
1	3	17	40	15	20	485.8	863.559
1	3	18	40	10	20	485.8	863.559
1	3	19	40	5	20	447	802.639
1	3	20	40	10	20	447	802.639
1	3	1	45	35	20	477.167	1146.62
1	3	2	45	55	20	477.167	1146.62
1	3	3	45	55	20	508.682	1381.33
1	3	4	45	55	20	508.682	1381.33
1	3	5	45	35	20	531	1242.52
1	3	6	45	45	20	531	1242.52
1	3	7	45	40	20	507.706	1070.09
1	3	8	45	45	20	507.706	1070.09
1	3	9	45	40	20	502.706	1065.78
1	3	10	45	45	20	502.706	1065.78
1	3	11	45	55	20	427.875	1196.17
1	3	12	45	25	20	427.875	1196.17
1	3	13	45	55	20	492.235	1181.43
1	3	14	45	30	20	492.235	1181.43
1	3	15	45	40	20	489.769	1102.17
1	3	16	45	25	20	489.769	1102.17
1	3	17	45	15	20	415.714	1041.39
1	3	18	45	20	20	415.714	1041.39
1	3	19	45	25	20	485.714	896.962
1	3	20	45	45	20	485.714	896.962
1	3	1	50	75	20	473.714	1253.55
1	3	2	50	65	20	473.714	1253.55
1	3	3	50	80	20	470.625	1171.75
1	3	4	50	80	20	470.625	1171.75
1	3	5	50	75	20	444.367	1668.22
1	3	6	50	75	20	444.367	1668.22
1	3	7	50	75	20	427.529	1062.2
1	3	8	50	95	20	427.529	1062.2
1	3	9	50	70	20	482.414	1196.6
1	3	10	50	75	20	482.414	1196.6
1	3	11	50	90	20	440.233	1019.7
1	3	12	50	60	20	440.233	1019.7
1	3	13	50	85	20	420.636	1087.17
1	3	14	50	80	20	420.636	1087.17
1	3	15	50	90	20	527.633	1334.5
1	3	16	50	60	20	527.633	1334.5
1	3	17	50	60	20	458.677	1008.86
1	3	18	50	95	20	458.677	1008.86
1	3	19	50	80	20	425.061	1012.71
1	3	20	50	85	20	425.061	1012.71
1	3	1	55	95	20	450.684	1548.5
1	3	2	55	95	20	450.684	1548.5
1	3	3	55	85	20	423.735	1401
1	3	4	55	85	20	423.735	1401
1	3	5	55	95	20	472.243	1303.33
1	3	6	55	90	20	472.243	1303.33
1	3	7	55	100	20	467.385	2010
1	3	8	55	95	20	467.385	2010
1	3	9	55	80	20	475.657	1397.8
1	3	10	55	95	20	475.657	1397.8
1	3	11	55	100	20	433.657	1439.2
1	3	12	55	75	20	433.657	1439.2
1	3	13	55	95	20	426.895	1593.5
1	3	14	55	95	20	426.895	1593.5
1	3	15	55	85	20	527.265	1444
1	3	16	55	85	20	527.265	1444
1	3	17	55	95	20	431.579	1083
1	3	18	55	95	20	431.579	1083
1	3	19	55	95	20	406.371	1327.5
1	3	20	55	80	20	406.371	1327.5
1	3	1	60	95	20	444.333	427
1	3	2	60	100	20	444.333	427
1	3	3	60	100	20	438.025
1	3	4	60	100	20	438.025
1	3	5	60	95	20	447.333	3250
1	3	6	60	100	20	447.333	3250
1	3	7	60	95	20	435.872	1377
1	3	8	60	100	20	435.872	1377
1	3	9	60	95	20	436.923
1	3	10	60	100	20	436.923
1	3	11	60	95	20	412.784	1869
1	3	12	60	90	20	412.784	1869
1	3	13	60	90	20	420.457	2437.5
1	3	14	60	85	20	420.457	2437.5
1	3	15	60	100	20	500.9
1	3	16	60	100	20	500.9
1	3	17	60	95	20	410.263	3101
1	3	18	60	95	20	410.263	3101
1	3	19	60	90	20	400.556	3013
1	3	20	60	90	20	400.556	3013
1	3	1	65	100	20	420
1	3	2	65	100	20	420
1	3	3	65	95	20	437.615	2708
1	3	4	65	100	20	437.615	2708
1	3	5	65	95	20	433	3045
1	3	6	65	100	20	433	3045
1	3	7	65	100	20	437.154
1	3	8	65	95	20	437.154
1	3	9	65	90	20	448.658	1707
1	3	10	65	100	20	448.658	1707
1	3	11	65	85	20	407.541	3182
1	3	12	65	100	20	407.541	3182
1	3	13	65	100	20	426.725
1	3	14	65	100	20	426.725
1	3	15	65	90	20	515.421	246
1	3	16	65	100	20	515.421	246
1	3	17	65	85	20	420.944	398
1	3	18	65	95	20	420.944	398
1	3	19	65	95	20	428.128
1	3	20	65	100	20	428.128
1	3	1	75	100	20	425.1
1	3	2	75	100	20	425.1
1	3	3	75	95	20	438.128
1	3	4	75	100	20	438.128
1	3	5	75	95	20	440.378	3510
1	3	6	75	90	20	440.378	3510
1	3	7	75	95	20	430
1	3	8	75	95	20	430
1	3	9	75	95	20	420.027	1464.5
1	3	10	75	90	20	420.027	1464.5
1	3	11	75	100	20	433.564	3005
1	3	12	75	95	20	433.564	3005
1	3	13	75	100	20	403.8
1	3	14	75	100	20	403.8
1	3	15	75	80	20	489.5
1	3	16	75	100	20	489.5
1	3	17	75	95	20	425.054
1	3	18	75	90	20	425.054
1	3	19	75	95	20	402.154
1	3	20	75	100	20	402.154
1	3	1	100	95	20	437.744
1	3	2	100	100	20	437.744
1	3	3	100	100	20	432.237	3073.5
1	3	4	100	90	20	432.237	3073.5
1	3	5	100	95	20	413.162
1	3	6	100	90	20	413.162
1	3	7	100	100	20	461.75
1	3	8	100	100	20	461.75
1	3	9	100	100	20	457.385
1	3	10	100	95	20	457.385
1	3	11	100	100	20	444.718
1	3	12	100	95	20	444.718
1	3	13	100	95	20	409.816	3241
1	3	14	100	95	20	409.816	3241
1	3	15	100	90	20	550.579
1	3	16	100	100	20	550.579
1	3	17	100	100	20	433.95
1	3	18	100	100	20	433.95
1	3	19	100	90	20	408.297
1	3	20	100	95	20	408.297
2	4	1	0	0	20		719.118
2	4	2	0	0	20		719.118
2	4	3	0	0	20		685.027
2	4	4	0	0	20		685.027
2	4	5	0	0	20	570.5	664.125
2	4	6	0	10	20	570.5	664.125
2	4	7	0	0	20		690.861
2	4	8	0	0	20		690.861
2	4	9	0	5	20	288.5	628.895
2	4	10	0	5	20	288.5	628.895
2	4	11	0	5	20	258	673.4
2	4	12	0	0	20	258	673.4
2	4	13	0	0	20	465	699.389
2	4	14	0	5	20	465	699.389
2	4	15	0	5	20	300	670.553
2	4	16	0	0	20	300	670.553
2	4	17	0	5	20	462	612.235
2	4	18	0	10	20	462	612.235
2	4	19	0	5	20	341	649.094
2	4	20	0	0	20	341	649.094
2	4	1	25	20	20	486.375	905.643
2	4	2	25	20	20	486.375	905.643
2	4	3	25	5	20	324.5	676
2	4	4	25	5	20	324.5	676
2	4	5	25	0	20	672	641.889
2	4	6	25	5	20	672	641.889
2	4	7	25	10	20	367.333	670.029
2	4	8	25	5	20	367.333	670.029
2	4	9	25	15	20	276.833	732.625
2	4	10	25	15	20	276.833	732.625
2	4	11	25	10	20	439.5	759
2	4	12	25	10	20	439.5	759
2	4	13	25	20	20	333.2	815.483
2	4	14	25	5	20	333.2	815.483
2	4	15	25	5	20	294	788.816
2	4	16	25	5	20	294	788.816
2	4	17	25	20	20	487.2	805.606
2	4	18	25	5	20	487.2	805.606
2	4	19	25	10	20	400.833	691.875
2	4	20	25	20	20	400.833	691.875
2	4	1	35	15	20	318.375	894.156
2	4	2	35	25	20	318.375	894.156
2	4	3	35	20	20	292.667	740.939
2	4	4	35	10	20	292.667	740.939
2	4	5	35	20	20	363.6	800.308
2	4	6	35	5	20	363.6	800.308
2	4	7	35	25	20	382	715.821
2	4	8	35	20	20	382	715.821
2	4	9	35	30	20	342.333	760.833
2	4	10	35	30	20	342.333	760.833
2	4	11	35	30	20	303.111	953.577
2	4	12	35	15	20	303.111	953.577
2	4	13	35	20	20	308.4	866.667
2	4	14	35	5	20	308.4	866.667
2	4	15	35	30	20	299.875	844.931
2	4	16	35	10	20	299.875	844.931
2	4	17	35	30	20	354.2	862.107
2	4	18	35	20	20	354.2	862.107
2	4	19	35	15	20	298	832.441
2	4	20	35	10	20	298	832.441
2	4	1	40	40	20	292.308	876.16
2	4	2	40	25	20	292.308	876.16
2	4	3	40	35	20	318.2	850.778
2	4	4	40	15	20	318.2	850.778
2	4	5	40	15	20	320	730.161
2	4	6	40	10	20	320	730.161
2	4	7	40	20	20	385.857	759.548
2	4	8	40	15	20	385.857	759.548
2	4	9	40	35	20	326	954.148
2	4	10	40	25	20	326	954.148
2	4	11	40	35	20	373.769	767.909
2	4	12	40	30	20	373.769	767.909
2	4	13	40	40	20	332.938	950.421
2	4	14	40	40	20	332.938	950.421
2	4	15	40	50	20	310.263	853.714
2	4	16	40	45	20	310.263	853.714
2	4	17	40	40	20	359.615	944.958
2	4	18	40	25	20	359.615	944.958
2	4	19	40	55	20	335.722	901.526
2	4	20	40	35	20	335.722	901.526
2	4	1	45	60	20	358.529	1110.14
2	4	2	45	25	20	358.529	1110.14
2	4	3	45	35	20	312	836.179
2	4	4	45	25	20	312	836.179
2	4	5	45	55	20	352.857	1051.52
2	4	6	45	15	20	352.857	1051.52
2	4	7	45	35	20	370.417	814.577
2	4	8	45	25	20	370.417	814.577
2	4	9	45	35	20	320.688	684.1
2	4	10	45	45	20	320.688	684.1
2	4	11	45	25	20	319.385	910.875
2	4	12	45	40	20	319.385	910.875
2	4	13	45	50	20	352.083	1000.64
2	4	14	45	10	20	352.083	1000.64
2	4	15	45	35	20	343.316	885.15
2	4	16	45	60	20	343.316	885.15
2	4	17	45	45	20	329.5	971.739
2	4	18	45	35	20	329.5	971.739
2	4	19	45	60	20	345.105	951.263
2	4	20	45	35	20	345.105	951.263
2	4	1	50	60	20	318	1284.33
2	4	2	50	65	20	318	1284.33
2	4	3	50	40	20	306.471	854.043
2	4	4	50	45	20	306.471	854.043
2	4	5	50	45	20	304.5	989.474
2	4	6	50	25	20	304.5	989.474
2	4	7	50	55	20	395.667	878.833
2	4	8	50	50	20	395.667	878.833
2	4	9	50	70	20	316.524	795
2	4	10	50	35	20	316.524	795
2	4	11	50	55	20	316.6	983.158
2	4	12	50	45	20	316.6	983.158
2	4	13	50	50	20	349	1010.11
2	4	14	50	35	20	349	1010.11
2	4	15	50	75	20	321.5	725.625
2	4	16	50	75	20	321.5	725.625
2	4	17	50	70	20	349.381	989.4
2	4	18	50	35	20	349.381	989.4
2	4	19	50	70	20	322.455	848
2	4	20	50	40	20	322.455	848
2	4	1	55	65	20	298	1380
2	4	2	55	55	20	298	1380
2	4	3	55	65	20	324.5	875.286
2	4	4	55	55	20	324.5	875.286
2	4	5	55	40	20	353.583	1245.19
2	4	6	55	20	20	353.583	1245.19
2	4	7	55	70	20	431.12	631.833
2	4	8	55	55	20	431.12	631.833
2	4	9	55	70	20	304.667	885.182
2	4	10	55	65	20	304.667	885.182
2	4	11	55	70	20	343.769	733.636
2	4	12	55	60	20	343.769	733.636
2	4	13	55	75	20	329.333	1235.75
2	4	14	55	45	20	329.333	1235.75
2	4	15	55	70	20	314.172	919
2	4	16	55	75	20	314.172	919
2	4	17	55	70	20	361.917	1037.43
2	4	18	55	50	20	361.917	1037.43
2	4	19	55	85	20	325.966	789.778
2	4	20	55	60	20	325.966	789.778
2	4	1	60	75	20	307.259	1337.82
2	4	2	60	60	20	307.259	1337.82
2	4	3	60	65	20	324.667	794.923
2	4	4	60	70	20	324.667	794.923
2	4	5	60	70	20	317.722	951.706
2	4	6	60	20	20	317.722	951.706
2	4	7	60	75	20	400.962	883.214
2	4	8	60	55	20	400.962	883.214
2	4	9	60	90	20	319.677	959.571
2	4	10	60	65	20	319.677	959.571
2	4	11	60	80	20	310.24	892.143
2	4	12	60	45	20	310.24	892.143
2	4	13	60	75	20	318.92	995.417
2	4	14	60	50	20	318.92	995.417
2	4	15	60	90	20	315.152	1313
2	4	16	60	75	20	315.152	1313
2	4	17	60	95	20	342.69	1655.6
2	4	18	60	50	20	342.69	1655.6
2	4	19	60	85	20	321.929	628.833
2	4	20	60	55	20	321.929	628.833
2	4	1	65	70	20	363.667	981.875
2	4	2	65	65	20	363.667	981.875
2	4	3	65	80	20	317.935	575.429
2	4	4	65	75	20	317.935	575.429
2	4	5	65	75	20	322.286	776.417
2	4	6	65	30	20	322.286	776.417
2	4	7	65	80	20	413.63	936.909
2	4	8	65	55	20	413.63	936.909
2	4	9	65	90	20	303.029	791.4
2	4	10	65	80	20	303.029	791.4
2	4	11	65	85	20	338.032	1121
2	4	12	65	70	20	338.032	1121
2	4	13	65	90	20	347.733	592.833
2	4	14	65	60	20	347.733	592.833
2	4	15	65	90	20	330.455	1053.2
2	4	16	65	75	20	330.455	1053.2
2	4	17	65	85	20	340.727	1195.36
2	4	18	65	25	20	340.727	1195.36
2	4	19	65	85	20	317.273	841
2	4	20	65	80	20	317.273	841
2	4	1	75	80	20	289.786	1247.56
2	4	2	75	60	20	289.786	1247.56
2	4	3	75	80	20	324.7	1025.2
2	4	4	75	70	20	324.7	1025.2
2	4	5	75	80	20	304.167	1373.67
2	4	6	75	40	20	304.167	1373.67
2	4	7	75	75	20	349.517	2028.83
2	4	8	75	70	20	349.517	2028.83
2	4	9	75	85	20	303.367	854.7
2	4	10	75	65	20	303.367	854.7
2	4	11	75	90	20	303.3	1011.29
2	4	12	75	60	20	303.3	1011.29
2	4	13	75	90	20	341.379	1075.17
2	4	14	75	55	20	341.379	1075.17
2	4	15	75	100	20	334.105	1723.5
2	4	16	75	90	20	334.105	1723.5
2	4	17	75	100	20	324.097	1250
2	4	18	75	55	20	324.097	1250
2	4	19	75	100	20	315.265	1466.5
2	4	20	75	70	20	315.265	1466.5
2	4	1	100	80	20	328.481	1029.12
2	4	2	100	55	20	328.481	1029.12
2	4	3	100	95	20	329.114	548.667
2	4	4	100	80	20	329.114	548.667
2	4	5	100	85	20	320.591	1230.33
2	4	6	100	25	20	320.591	1230.33
2	4	7	100	80	20	360.059	725
2	4	8	100	90	20	360.059	725
2	4	9	100	90	20	315.774	1006.8
2	4	10	100	65	20	315.774	1006.8
2	4	11	100	95	20	320.824	663.75
2	4	12	100	75	20	320.824	663.75
2	4	13	100	90	20	353.034	692.167
2	4	14	100	55	20	353.034	692.167
2	4	15	100	95	20	339.622	507
2	4	16	100	90	20	339.622	507
2	4	17	100	90	20	340.786	1013
2	4	18	100	50	20	340.786	1013
2	4	19	100	100	20	347.568	503
2	4	20	100	85	20	347.568	503
2	5	1	0	5	20	554	765.333
2	5	2	0	0	20	554	765.333
2	5	3	0	0	20		949.5
2	5	4	0	0	20		949.5
2	5	5	0	0	20		848.1
2	5	6	0	0	20		848.1
2	5	7	0	0	20		770.825
2	5	8	0	0	20		770.825
2	5	9	0	0	20	604	708.769
2	5	10	0	5	20	604	708.769
2	5	11	0	0	20		753.3
2	5	12	0	0	20		753.3
2	5	13	0	0	20		590.525
2	5	14	0	0	20		590.525
2	5	15	0	0	20		664.35
2	5	16	0	0	20		664.35
2	5	17	0	0	20		568.974
2	5	18	0	0	20		568.974
2	5	19	0	0	20		577.125
2	5	20	0	0	20		577.125
2	5	1	25	20	20	396.429	1002.44
2	5	2	25	15	20	396.429	1002.44
2	5	3	25	0	20	441	1106.37
2	5	4	25	5	20	441	1106.37
2	5	5	25	0	20	542	920.897
2	5	6	25	5	20	542	920.897
2	5	7	25	10	20	551.667	869.378
2	5	8	25	5	20	551.667	869.378
2	5	9	25	10	20	470.333	887.757
2	5	10	25	5	20	470.333	887.757
2	5	11	25	0	20	754	891.632
2	5	12	25	5	20	754	891.632
2	5	13	25	10	20	538.5	685.105
2	5	14	25	0	20	538.5	685.105
2	5	15	25	5	20	641	738.895
2	5	16	25	0	20	641	738.895
2	5	17	25	0	20		642.6
2	5	18	25	0	20		642.6
2	5	19	25	0	20	412	638.795
2	5	20	25	5	20	412	638.795
2	5	1	35	20	20	438.714	1092.13
2	5	2	35	15	20	438.714	1092.13
2	5	3	35	30	20	537.3	998.69
2	5	4	35	20	20	537.3	998.69
2	5	5	35	15	20	578.4	891.286
2	5	6	35	10	20	578.4	891.286
2	5	7	35	20	20	532.9	898.448
2	5	8	35	30	20	532.9	898.448
2	5	9	35	25	20	600.714	944.242
2	5	10	35	10	20	600.714	944.242
2	5	11	35	25	20	605.75	887.281
2	5	12	35	15	20	605.75	887.281
2	5	13	35	5	20	505.25	758.361
2	5	14	35	15	20	505.25	758.361
2	5	15	35	15	20	511.25	857.278
2	5	16	35	5	20	511.25	857.278
2	5	17	35	20	20	581.4	728.686
2	5	18	35	5	20	581.4	728.686
2	5	19	35	10	20	479.333	753.028
2	5	20	35	5	20	479.333	753.028
2	5	1	40	40	20	428.235	1175.95
2	5	2	40	45	20	428.235	1175.95
2	5	3	40	45	20	570	1035.62
2	5	4	40	25	20	570	1035.62
2	5	5	40	30	20	639.7	985.433
2	5	6	40	20	20	639.7	985.433
2	5	7	40	40	20	512.533	960.32
2	5	8	40	35	20	512.533	960.32
2	5	9	40	50	20	537.214	985.654
2	5	10	40	20	20	537.214	985.654
2	5	11	40	25	20	596.125	1028.97
2	5	12	40	15	20	596.125	1028.97
2	5	13	40	45	20	522.214	868.154
2	5	14	40	25	20	522.214	868.154
2	5	15	40	20	20	583.6	978.367
2	5	16	40	30	20	583.6	978.367
2	5	17	40	25	20	493.833	767.882
2	5	18	40	5	20	493.833	767.882
2	5	19	40	30	20	492.273	709.643
2	5	20	40	25	20	492.273	709.643
2	5	1	45	70	20	415.462	879.727
2	5	2	45	70	20	415.462	879.727
2	5	3	45	30	20	548.462	1198.81
2	5	4	45	35	20	548.462	1198.81
2	5	5	45	50	20	597.824	1163.35
2	5	6	45	35	20	597.824	1163.35
2	5	7	45	50	20	556.947	1026.29
2	5	8	45	45	20	556.947	1026.29
2	5	9	45	40	20	525.133	844.625
2	5	10	45	35	20	525.133	844.625
2	5	11	45	45	20	554.667	865.682
2	5	12	45	45	20	554.667	865.682
2	5	13	45	35	20	500.5	820.545
2	5	14	45	55	20	500.5	820.545
2	5	15	45	50	20	558.526	977.905
2	5	16	45	45	20	558.526	977.905
2	5	17	45	50	20	503.333	907.643
2	5	18	45	10	20	503.333	907.643
2	5	19	45	55	20	519.812	815.708
2	5	20	45	25	20	519.812	815.708
2	5	1	50	60	20	414.538	1101.79
2	5	2	50	70	20	414.538	1101.79
2	5	3	50	55	20	561.053	1072.71
2	5	4	50	40	20	561.053	1072.71
2	5	5	50	70	20	583.542	857.062
2	5	6	50	50	20	583.542	857.062
2	5	7	50	60	20	536.148	1247.33
2	5	8	50	75	20	536.148	1247.33
2	5	9	50	55	20	518.083	918.4
2	5	10	50	65	20	518.083	918.4
2	5	11	50	65	20	584.704	873.769
2	5	12	50	70	20	584.704	873.769
2	5	13	50	65	20	518.143	862.333
2	5	14	50	75	20	518.143	862.333
2	5	15	50	75	20	537.231	1013.86
2	5	16	50	55	20	537.231	1013.86
2	5	17	50	65	20	496.091	1172.33
2	5	18	50	45	20	496.091	1172.33
2	5	19	50	50	20	505.773	787.444
2	5	20	50	60	20	505.773	787.444
2	5	1	55	85	20	412.9	1304.75
2	5	2	55	65	20	412.9	1304.75
2	5	3	55	55	20	597.958	1363.07
2	5	4	55	65	20	597.958	1363.07
2	5	5	55	75	20	631.889	1109.62
2	5	6	55	60	20	631.889	1109.62
2	5	7	55	80	20	513.188	978.571
2	5	8	55	80	20	513.188	978.571
2	5	9	55	90	20	519.625	1031.62
2	5	10	55	70	20	519.625	1031.62
2	5	11	55	75	20	569.517	862.1
2	5	12	55	70	20	569.517	862.1
2	5	13	55	85	20	496	905.5
2	5	14	55	75	20	496	905.5
2	5	15	55	85	20	548.469	1044.62
2	5	16	55	75	20	548.469	1044.62
2	5	17	55	75	20	517.818	1071.5
2	5	18	55	35	20	517.818	1071.5
2	5	19	55	75	20	493.567	947
2	5	20	55	75	20	493.567	947
2	5	1	60	95	20	387.594	1631.38
2	5	2	60	65	20	387.594	1631.38
2	5	3	60	75	20	568.161	1317.11
2	5	4	60	80	20	568.161	1317.11
2	5	5	60	65	20	579.375	1167.93
2	5	6	60	55	20	579.375	1167.93
2	5	7	60	100	20	542.919	1016.33
2	5	8	60	85	20	542.919	1016.33
2	5	9	60	90	20	513.556	917
2	5	10	60	90	20	513.556	917
2	5	11	60	100	20	578.316	877
2	5	12	60	90	20	578.316	877
2	5	13	60	90	20	515.27	611.667
2	5	14	60	95	20	515.27	611.667
2	5	15	60	85	20	501.206	1086.67
2	5	16	60	85	20	501.206	1086.67
2	5	17	60	95	20	503.829	704
2	5	18	60	80	20	503.829	704
2	5	19	60	85	20	510.471	742
2	5	20	60	85	20	510.471	742
2	5	1	65	90	20	418.472	866.5
2	5	2	65	90	20	418.472	866.5
2	5	3	65	75	20	563.267	1163.86
2	5	4	65	75	20	563.267	1163.86
2	5	5	65	95	20	577.526	948.5
2	5	6	65	95	20	577.526	948.5
2	5	7	65	90	20	531.237	941
2	5	8	65	100	20	531.237	941
2	5	9	65	95	20	510.026	1296.5
2	5	10	65	95	20	510.026	1296.5
2	5	11	65	95	20	566.75	823.5
2	5	12	65	85	20	566.75	823.5
2	5	13	65	95	20	523.306	870
2	5	14	65	85	20	523.306	870
2	5	15	65	95	20	509	1231
2	5	16	65	90	20	509	1231
2	5	17	65	95	20	506.541	1480
2	5	18	65	90	20	506.541	1480
2	5	19	65	90	20	502.486	659
2	5	20	65	95	20	502.486	659
2	5	1	75	80	20	426.576	715.75
2	5	2	75	85	20	426.576	715.75
2	5	3	75	100	20	608.525
2	5	4	75	100	20	608.525
2	5	5	75	95	20	574.59
2	5	6	75	100	20	574.59
2	5	7	75	100	20	526
2	5	8	75	100	20	526
2	5	9	75	90	20	496.211	2703
2	5	10	75	100	20	496.211	2703
2	5	11	75	100	20	565.425
2	5	12	75	100	20	565.425
2	5	13	75	95	20	506.641	782
2	5	14	75	100	20	506.641	782
2	5	15	75	100	20	514.667
2	5	16	75	95	20	514.667
2	5	17	75	100	20	487.421	1818
2	5	18	75	90	20	487.421	1818
2	5	19	75	100	20	515.692	726
2	5	20	75	95	20	515.692	726
2	5	1	100	90	20	450.361	1186
2	5	2	100	90	20	450.361	1186
2	5	3	100	100	20	584.359
2	5	4	100	95	20	584.359
2	5	5	100	100	20	603.425
2	5	6	100	100	20	603.425
2	5	7	100	90	20	544.189
2	5	8	100	95	20	544.189
2	5	9	100	100	20	489.85
2	5	10	100	100	20	489.85
2	5	11	100	95	20	587.051	880
2	5	12	100	100	20	587.051	880
2	5	13	100	100	20	503.9
2	5	14	100	100	20	503.9
2	5	15	100	100	20	502.075
2	5	16	100	100	20	502.075
2	5	17	100	100	20	532.375
2	5	18	100	100	20	532.375
2	5	19	100	100	20	527.45
2	5	20	100	100	20	527.45
2	6	1	0	0	20		506.949
2	6	2	0	0	20		506.949
2	6	3	0	0	20		654.231
2	6	4	0	0	20		654.231
2	6	5	0	0	20		571.025
2	6	6	0	0	20		571.025
2	6	7	0	0	20		636.025
2	6	8	0	0	20		636.025
2	6	9	0	0	20		552.125
2	6	10	0	0	20		552.125
2	6	11	0	0	20		587.425
2	6	12	0	0	20		587.425
2	6	13	0	5	20	406	534.359
2	6	14	0	0	20	406	534.359
2	6	15	0	0	20		538.375
2	6	16	0	0	20		538.375
2	6	17	0	0	20		585.075
2	6	18	0	0	20		585.075
2	6	19	0	0	20		527.175
2	6	20	0	0	20		527.175
2	6	1	25	5	20	369.5	587.865
2	6	2	25	5	20	369.5	587.865
2	6	3	25	0	20	542.5	636.865
2	6	4	25	10	20	542.5	636.865
2	6	5	25	15	20	376.75	648.086
2	6	6	25	5	20	376.75	648.086
2	6	7	25	0	20		618.179
2	6	8	25	0	20		618.179
2	6	9	25	15	20	369	577
2	6	10	25	0	20	369	577
2	6	11	25	5	20	483	582.436
2	6	12	25	0	20	483	582.436
2	6	13	25	0	20	354	528.692
2	6	14	25	5	20	354	528.692
2	6	15	25	0	20		538.425
2	6	16	25	0	20		538.425
2	6	17	25	0	20	392	589.436
2	6	18	25	5	20	392	589.436
2	6	19	25	0	20		592.3
2	6	20	25	0	20		592.3
2	6	1	35	25	20	368	640.848
2	6	2	35	10	20	368	640.848
2	6	3	35	10	20	396.2	689.265
2	6	4	35	15	20	396.2	689.265
2	6	5	35	20	20	366	739.886
2	6	6	35	5	20	366	739.886
2	6	7	35	25	20	355.4	655.8
2	6	8	35	0	20	355.4	655.8
2	6	9	35	25	20	382.5	611.312
2	6	10	35	15	20	382.5	611.312
2	6	11	35	0	20	373.667	695.568
2	6	12	35	15	20	373.667	695.568
2	6	13	35	10	20	322.6	680.8
2	6	14	35	15	20	322.6	680.8
2	6	15	35	20	20	313.4	588.829
2	6	16	35	5	20	313.4	588.829
2	6	17	35	10	20	362	710.8
2	6	18	35	15	20	362	710.8
2	6	19	35	25	20	374.429	685.697
2	6	20	35	10	20	374.429	685.697
2	6	1	40	35	20	406.5	690.8
2	6	2	40	15	20	406.5	690.8
2	6	3	40	25	20	425.8	828.367
2	6	4	40	25	20	425.8	828.367
2	6	5	40	35	20	392	658.172
2	6	6	40	20	20	392	658.172
2	6	7	40	25	20	351.167	859.735
2	6	8	40	5	20	351.167	859.735
2	6	9	40	45	20	382.941	735.261
2	6	10	40	40	20	382.941	735.261
2	6	11	40	25	20	389.091	761.897
2	6	12	40	30	20	389.091	761.897
2	6	13	40	30	20	355.25	714.094
2	6	14	40	10	20	355.25	714.094
2	6	15	40	45	20	336.786	694.192
2	6	16	40	25	20	336.786	694.192
2	6	17	40	40	20	387.167	715.909
2	6	18	40	50	20	387.167	715.909
2	6	19	40	50	20	403.067	712.8
2	6	20	40	25	20	403.067	712.8
2	6	1	45	50	20	362	679
2	6	2	45	35	20	362	679
2	6	3	45	50	20	387.529	754.826
2	6	4	45	35	20	387.529	754.826
2	6	5	45	45	20	406.095	761.211
2	6	6	45	60	20	406.095	761.211
2	6	7	45	75	20	370.37	736.154
2	6	8	45	60	20	370.37	736.154
2	6	9	45	60	20	379.143	719.158
2	6	10	45	45	20	379.143	719.158
2	6	11	45	50	20	388.667	829.591
2	6	12	45	40	20	388.667	829.591
2	6	13	45	60	20	367.632	703.81
2	6	14	45	35	20	367.632	703.81
2	6	15	45	60	20	334.526	729.429
2	6	16	45	35	20	334.526	729.429
2	6	17	45	75	20	407.806	767.333
2	6	18	45	80	20	407.806	767.333
2	6	19	45	65	20	365.519	744.692
2	6	20	45	70	20	365.519	744.692
2	6	1	50	85	20	371.138	882.909
2	6	2	50	60	20	371.138	882.909
2	6	3	50	55	20	406.857	899.526
2	6	4	50	50	20	406.857	899.526
2	6	5	50	60	20	373.261	805.412
2	6	6	50	55	20	373.261	805.412
2	6	7	50	80	20	385.968	937.111
2	6	8	50	75	20	385.968	937.111
2	6	9	50	80	20	392.5	1112.5
2	6	10	50	80	20	392.5	1112.5
2	6	11	50	70	20	390.16	752.143
2	6	12	50	55	20	390.16	752.143
2	6	13	50	65	20	357.296	680.846
2	6	14	50	70	20	357.296	680.846
2	6	15	50	80	20	338.464	694.25
2	6	16	50	60	20	338.464	694.25
2	6	17	50	75	20	382.812	744.5
2	6	18	50	85	20	382.812	744.5
2	6	19	50	80	20	390	903.714
2	6	20	50	85	20	390	903.714
2	6	1	55	85	20	364.29	668.222
2	6	2	55	70	20	364.29	668.222
2	6	3	55	75	20	392.179	791.25
2	6	4	55	65	20	392.179	791.25
2	6	5	55	75	20	360.586	918.222
2	6	6	55	70	20	360.586	918.222
2	6	7	55	90	20	385.406	804.75
2	6	8	55	70	20	385.406	804.75
2	6	9	55	85	20	387.059	702
2	6	10	55	85	20	387.059	702
2	6	11	55	85	20	386.171	854.6
2	6	12	55	90	20	386.171	854.6
2	6	13	55	85	20	360.353	770.667
2	6	14	55	85	20	360.353	770.667
2	6	15	55	100	20	344.278	695.5
2	6	16	55	80	20	344.278	695.5
2	6	17	55	85	20	373.361	854
2	6	18	55	95	20	373.361	854
2	6	19	55	95	20	402.237	596
2	6	20	55	95	20	402.237	596
2	6	1	60	100	20	384.541	850.667
2	6	2	60	85	20	384.541	850.667
2	6	3	60	80	20	414.968	969.333
2	6	4	60	75	20	414.968	969.333
2	6	5	60	100	20	363.763	677.5
2	6	6	60	90	20	363.763	677.5
2	6	7	60	100	20	383.421	882.5
2	6	8	60	90	20	383.421	882.5
2	6	9	60	95	20	394.243	785
2	6	10	60	90	20	394.243	785
2	6	11	60	100	20	412.711	951.5
2	6	12	60	90	20	412.711	951.5
2	6	13	60	95	20	361.054	650
2	6	14	60	90	20	361.054	650
2	6	15	60	100	20	353.282	519
2	6	16	60	95	20	353.282	519
2	6	17	60	95	20	377.615	748
2	6	18	60	100	20	377.615	748
2	6	19	60	100	20	381.385	920
2	6	20	60	95	20	381.385	920
2	6	1	65	100	20	352.25
2	6	2	65	100	20	352.25
2	6	3	65	90	20	410.833	883
2	6	4	65	90	20	410.833	883
2	6	5	65	95	20	380.026
2	6	6	65	100	20	380.026
2	6	7	65	100	20	404.025
2	6	8	65	100	20	404.025
2	6	9	65	100	20	401.59	1077
2	6	10	65	95	20	401.59	1077
2	6	11	65	100	20	422.385	825
2	6	12	65	95	20	422.385	825
2	6	13	65	100	20	366.675
2	6	14	65	100	20	366.675
2	6	15	65	100	20	367.316	1235
2	6	16	65	90	20	367.316	1235
2	6	17	65	95	20	376.154
2	6	18	65	100	20	376.154
2	6	19	65	100	20	394.077	864
2	6	20	65	95	20	394.077	864
2	6	1	75	100	20	374.4
2	6	2	75	100	20	374.4
2	6	3	75	100	20	396.975
2	6	4	75	100	20	396.975
2	6	5	75	100	20	369.475
2	6	6	75	100	20	369.475
2	6	7	75	100	20	391.375
2	6	8	75	100	20	391.375
2	6	9	75	100	20	388.2
2	6	10	75	100	20	388.2
2	6	11	75	100	20	434.875
2	6	12	75	100	20	434.875
2	6	13	75	100	20	381.95
2	6	14	75	100	20	381.95
2	6	15	75	100	20	358.225
2	6	16	75	100	20	358.225
2	6	17	75	100	20	383.175
2	6	18	75	100	20	383.175
2	6	19	75	100	20	385.2
2	6	20	75	100	20	385.2
2	6	1	100	100	20	363.825
2	6	2	100	100	20	363.825
2	6	3	100	100	20	414.231
2	6	4	100	95	20	414.231
2	6	5	100	100	20	422.025
2	6	6	100	100	20	422.025
2	6	7	100	100	20	402.85
2	6	8	100	100	20	402.85
2	6	9	100	100	20	406.45
2	6	10	100	100	20	406.45
2	6	11	100	100	20	441.85
2	6	12	100	100	20	441.85
2	6	13	100	100	20	419.475
2	6	14	100	100	20	419.475
2	6	15	100	100	20	369.525
2	6	16	100	100	20	369.525
2	6	17	100	100	20	392.075
2	6	18	100	100	20	392.075
2	6	19	100	100	20	390.875
2	6	20	100	100	20	390.875
3	7	1	0	0	20		645.316
3	7	2	0	0	20		645.316
3	7	3	0	0	20		539.897
3	7	4	0	0	20		539.897
3	7	5	0	0	20		551.256
3	7	6	0	0	20		551.256
3	7	7	0	0	20		520.125
3	7	8	0	0	20		520.125
3	7	9	0	0	20	877	579.615
3	7	10	0	5	20	877	579.615
3	7	11	0	0	20		631.725
3	7	12	0	0	20		631.725
3	7	13	0	0	20		527.846
3	7	14	0	0	20		527.846
3	7	15	0	0	20		586.75
3	7	16	0	0	20		586.75
3	7	17	0	0	20	860	564.784
3	7	18	0	5	20	860	564.784
3	7	19	0	0	20	513.5	639.969
3	7	20	0	10	20	513.5	639.969
3	7	1	25	0	20	973	625.342
3	7	2	25	5	20	973	625.342
3	7	3	25	0	20		536.3
3	7	4	25	0	20		536.3
3	7	5	25	0	20		604.436
3	7	6	25	0	20		604.436
3	7	7	25	0	20		578.15
3	7	8	25	0	20		578.15
3	7	9	25	0	20		517.225
3	7	10	25	0	20		517.225
3	7	11	25	0	20		602.45
3	7	12	25	0	20		602.45
3	7	13	25	0	20		495.684
3	7	14	25	0	20		495.684
3	7	15	25	0	20		560.077
3	7	16	25	0	20		560.077
3	7	17	25	0	20		610.457
3	7	18	25	0	20		610.457
3	7	19	25	5	20	587.5	848.059
3	7	20	25	5	20	587.5	848.059
3	7	1	35	0	20	354	787.784
3	7	2	35	10	20	354	787.784
3	7	3	35	0	20	308.5	736.886
3	7	4	35	10	20	308.5	736.886
3	7	5	35	15	20	450	723.114
3	7	6	35	10	20	450	723.114
3	7	7	35	0	20		652.025
3	7	8	35	0	20		652.025
3	7	9	35	5	20	424	635.605
3	7	10	35	0	20	424	635.605
3	7	11	35	5	20	410	621.541
3	7	12	35	0	20	410	621.541
3	7	13	35	0	20		743.405
3	7	14	35	0	20		743.405
3	7	15	35	0	20		566
3	7	16	35	0	20		566
3	7	17	35	0	20	880	704.516
3	7	18	35	5	20	880	704.516
3	7	19	35	5	20	639	823.872
3	7	20	35	0	20	639	823.872
3	7	1	40	15	20	418	870.75
3	7	2	40	40	20	418	870.75
3	7	3	40	10	20	465.333	714.355
3	7	4	40	35	20	465.333	714.355
3	7	5	40	20	20	477.375	951.267
3	7	6	40	20	20	477.375	951.267
3	7	7	40	5	20	402	638.459
3	7	8	40	10	20	402	638.459
3	7	9	40	15	20	341.833	763.636
3	7	10	40	15	20	341.833	763.636
3	7	11	40	0	20	398	744.083
3	7	12	40	15	20	398	744.083
3	7	13	40	20	20	377.5	726.571
3	7	14	40	0	20	377.5	726.571
3	7	15	40	20	20	425.75	682.472
3	7	16	40	0	20	425.75	682.472
3	7	17	40	0	20	406.667	830.417
3	7	18	40	15	20	406.667	830.417
3	7	19	40	5	20	577	843.811
3	7	20	40	5	20	577	843.811
3	7	1	45	40	20	360.474	1102.1
3	7	2	45	55	20	360.474	1102.1
3	7	3	45	45	20	423.211	856.684
3	7	4	45	50	20	423.211	856.684
3	7	5	45	40	20	435.85	1032.58
3	7	6	45	60	20	435.85	1032.58
3	7	7	45	30	20	376.8	766.24
3	7	8	45	45	20	376.8	766.24
3	7	9	45	40	20	384.353	740.478
3	7	10	45	45	20	384.353	740.478
3	7	11	45	30	20	405.353	801.739
3	7	12	45	55	20	405.353	801.739
3	7	13	45	50	20	367.941	870.048
3	7	14	45	35	20	367.941	870.048
3	7	15	45	40	20	391	762.615
3	7	16	45	30	20	391	762.615
3	7	17	45	25	20	417.222	773.8
3	7	18	45	20	20	417.222	773.8
3	7	19	45	45	20	393.765	880.773
3	7	20	45	40	20	393.765	880.773
3	7	1	50	85	20	361.138	909.273
3	7	2	50	60	20	361.138	909.273
3	7	3	50	70	20	377.576	870.857
3	7	4	50	95	20	377.576	870.857
3	7	5	50	90	20	431.543	1210.8
3	7	6	50	85	20	431.543	1210.8
3	7	7	50	50	20	384.679	1067.67
3	7	8	50	90	20	384.679	1067.67
3	7	9	50	80	20	402.167	1051.5
3	7	10	50	70	20	402.167	1051.5
3	7	11	50	75	20	407.581	782.444
3	7	12	50	80	20	407.581	782.444
3	7	13	50	50	20	375.542	1032.71
3	7	14	50	70	20	375.542	1032.71
3	7	15	50	65	20	378.321	841.364
3	7	16	50	75	20	378.321	841.364
3	7	17	50	45	20	408.421	898.9
3	7	18	50	50	20	408.421	898.9
3	7	19	50	50	20	403.56	961.429
3	7	20	50	75	20	403.56	961.429
3	7	1	55	75	20	361.5	820.4
3	7	2	55	95	20	361.5	820.4
3	7	3	55	90	20	368.027	1134
3	7	4	55	95	20	368.027	1134
3	7	5	55	90	20	440	1503
3	7	6	55	85	20	440	1503
3	7	7	55	85	20	382.083	658.5
3	7	8	55	95	20	382.083	658.5
3	7	9	55	90	20	380.316	1208
3	7	10	55	100	20	380.316	1208
3	7	11	55	65	20	391.656	1009.12
3	7	12	55	95	20	391.656	1009.12
3	7	13	55	60	20	375.464	1304.71
3	7	14	55	80	20	375.464	1304.71
3	7	15	55	85	20	396.294	822.833
3	7	16	55	85	20	396.294	822.833
3	7	17	55	70	20	401.31	1157.86
3	7	18	55	75	20	401.31	1157.86
3	7	19	55	80	20	388.278	770
3	7	20	55	100	20	388.278	770
3	7	1	60	95	20	363.737	767
3	7	2	60	95	20	363.737	767
3	7	3	60	100	20	369.875
3	7	4	60	100	20	369.875
3	7	5	60	100	20	404.15
3	7	6	60	100	20	404.15
3	7	7	60	95	20	368	1065
3	7	8	60	100	20	368	1065
3	7	9	60	100	20	367.275
3	7	10	60	100	20	367.275
3	7	11	60	100	20	406.395	448
3	7	12	60	90	20	406.395	448
3	7	13	60	70	20	366	1371.62
3	7	14	60	85	20	366	1371.62
3	7	15	60	90	20	376.842	758
3	7	16	60	100	20	376.842	758
3	7	17	60	80	20	368.889	688.333
3	7	18	60	100	20	368.889	688.333
3	7	19	60	95	20	395.077	676
3	7	20	60	100	20	395.077	676
3	7	1	65	95	20	376	1000
3	7	2	65	85	20	376	1000
3	7	3	65	95	20	364.282	1271
3	7	4	65	100	20	364.282	1271
3	7	5	65	100	20	408.275
3	7	6	65	100	20	408.275
3	7	7	65	100	20	382.2
3	7	8	65	100	20	382.2
3	7	9	65	100	20	371.075
3	7	10	65	100	20	371.075
3	7	11	65	95	20	388.154
3	7	12	65	100	20	388.154
3	7	13	65	80	20	379.143	1086
3	7	14	65	95	20	379.143	1086
3	7	15	65	95	20	370.632	1619
3	7	16	65	95	20	370.632	1619
3	7	17	65	90	20	372.129	797.6
3	7	18	65	65	20	372.129	797.6
3	7	19	65	90	20	404.946
3	7	20	65	95	20	404.946
3	7	1	75	90	20	372.054	2717
3	7	2	75	95	20	372.054	2717
3	7	3	75	100	20	395.658	1506
3	7	4	75	90	20	395.658	1506
3	7	5	75	95	20	407.658	2451
3	7	6	75	95	20	407.658	2451
3	7	7	75	100	20	381.15
3	7	8	75	100	20	381.15
3	7	9	75	100	20	383.675
3	7	10	75	100	20	383.675
3	7	11	75	100	20	385.675
3	7	12	75	100	20	385.675
3	7	13	75	90	20	384.649	1970.5
3	7	14	75	95	20	384.649	1970.5
3	7	15	75	90	20	379.162	2084
3	7	16	75	95	20	379.162	2084
3	7	17	75	85	20	387.344	1008.83
3	7	18	75	75	20	387.344	1008.83
3	7	19	75	100	20	402.919	1317
3	7	20	75	85	20	402.919	1317
3	7	1	100	80	20	376.794	649
3	7	2	100	90	20	376.794	649
3	7	3	100	100	20	370.075
3	7	4	100	100	20	370.075
3	7	5	100	100	20	415.95
3	7	6	100	100	20	415.95
3	7	7	100	95	20	402.632	2916
3	7	8	100	95	20	402.632	2916
3	7	9	100	100	20	368.45
3	7	10	100	100	20	368.45
3	7	11	100	95	20	385.641	1858
3	7	12	100	100	20	385.641	1858
3	7	13	100	80	20	360.091	1587.4
3	7	14	100	85	20	360.091	1587.4
3	7	15	100	100	20	378.769	768
3	7	16	100	95	20	378.769	768
3	7	17	100	80	20	412.759	501.857
3	7	18	100	65	20	412.759	501.857
3	7	19	100	90	20	389.595	1224
3	7	20	100	95	20	389.595	1224
3	8	1	0	0	20		564.725
3	8	2	0	0	20		564.725
3	8	3	0	0	20		1036.57
3	8	4	0	0	20		1036.57
3	8	5	0	0	20		718
3	8	6	0	0	20		718
3	8	7	0	0	20		749.275
3	8	8	0	0	20		749.275
3	8	9	0	0	20		714.325
3	8	10	0	0	20		714.325
3	8	11	0	0	20		692.525
3	8	12	0	0	20		692.525
3	8	13	0	0	20		693.975
3	8	14	0	0	20		693.975
3	8	15	0	0	20		681.575
3	8	16	0	0	20		681.575
3	8	17	0	0	20		612.75
3	8	18	0	0	20		612.75
3	8	19	0	0	20		592.025
3	8	20	0	0	20		592.025
3	8	1	25	5	20	330	561.368
3	8	2	25	5	20	330	561.368
3	8	3	25	0	20		987.526
3	8	4	25	0	20		987.526
3	8	5	25	5	20	345	828.179
3	8	6	25	0	20	345	828.179
3	8	7	25	0	20		677.3
3	8	8	25	0	20		677.3
3	8	9	25	0	20		716
3	8	10	25	0	20		716
3	8	11	25	0	20		715.95
3	8	12	25	0	20		715.95
3	8	13	25	0	20		670.225
3	8	14	25	0	20		670.225
3	8	15	25	0	20		726.6
3	8	16	25	0	20		726.6
3	8	17	25	0	20		589.725
3	8	18	25	0	20		589.725
3	8	19	25	0	20		635.25
3	8	20	25	0	20		635.25
3	8	1	35	5	20	425.5	649.105
3	8	2	35	5	20	425.5	649.105
3	8	3	35	0	20		804.73
3	8	4	35	0	20		804.73
3	8	5	35	5	20	345.5	707.243
3	8	6	35	5	20	345.5	707.243
3	8	7	35	5	20	363.333	685.838
3	8	8	35	10	20	363.333	685.838
3	8	9	35	0	20		710.925
3	8	10	35	0	20		710.925
3	8	11	35	5	20	353	722.359
3	8	12	35	0	20	353	722.359
3	8	13	35	0	20		743.3
3	8	14	35	0	20		743.3
3	8	15	35	0	20		679.15
3	8	16	35	0	20		679.15
3	8	17	35	0	20	322	618.5
3	8	18	35	5	20	322	618.5
3	8	19	35	10	20	320.667	632.568
3	8	20	35	5	20	320.667	632.568
3	8	1	40	20	20	340.625	617.548
3	8	2	40	20	20	340.625	617.548
3	8	3	40	5	20	532.2	904.455
3	8	4	40	20	20	532.2	904.455
3	8	5	40	20	20	386	713.143
3	8	6	40	5	20	386	713.143
3	8	7	40	15	20	410.875	730.688
3	8	8	40	25	20	410.875	730.688
3	8	9	40	10	20	347.667	806.595
3	8	10	40	5	20	347.667	806.595
3	8	11	40	20	20	374	729.429
3	8	12	40	5	20	374	729.429
3	8	13	40	5	20	333	707.231
3	8	14	40	0	20	333	707.231
3	8	15	40	5	20	316	730
3	8	16	40	0	20	316	730
3	8	17	40	10	20	334.667	682.778
3	8	18	40	5	20	334.667	682.778
3	8	19	40	15	20	332.75	701.361
3	8	20	40	5	20	332.75	701.361
3	8	1	45	30	20	348.455	632.379
3	8	2	45	25	20	348.455	632.379
3	8	3	45	15	20	437.2	954.103
3	8	4	45	35	20	437.2	954.103
3	8	5	45	45	20	354.778	799.636
3	8	6	45	45	20	354.778	799.636
3	8	7	45	40	20	364.545	797.833
3	8	8	45	70	20	364.545	797.833
3	8	9	45	15	20	359.154	809.148
3	8	10	45	50	20	359.154	809.148
3	8	11	45	40	20	356.312	795
3	8	12	45	40	20	356.312	795
3	8	13	45	5	20	400.5	795.029
3	8	14	45	25	20	400.5	795.029
3	8	15	45	15	20	386.571	729.303
3	8	16	45	20	20	386.571	729.303
3	8	17	45	30	20	347.5	686.643
3	8	18	45	30	20	347.5	686.643
3	8	19	45	25	20	367.615	682.519
3	8	20	45	40	20	367.615	682.519
3	8	1	50	50	20	326.045	674.444
3	8	2	50	60	20	326.045	674.444
3	8	3	50	35	20	385.4	880.36
3	8	4	50	40	20	385.4	880.36
3	8	5	50	55	20	362.385	718.714
3	8	6	50	75	20	362.385	718.714
3	8	7	50	70	20	345.161	821.444
3	8	8	50	85	20	345.161	821.444
3	8	9	50	70	20	367.267	690.556
3	8	10	50	80	20	367.267	690.556
3	8	11	50	65	20	364.714	706.167
3	8	12	50	75	20	364.714	706.167
3	8	13	50	65	20	351.556	777.692
3	8	14	50	70	20	351.556	777.692
3	8	15	50	45	20	351.611	725.409
3	8	16	50	45	20	351.611	725.409
3	8	17	50	65	20	379.154	694.714
3	8	18	50	65	20	379.154	694.714
3	8	19	50	60	20	340.519	715.462
3	8	20	50	75	20	340.519	715.462
3	8	1	55	80	20	347.031	755.25
3	8	2	55	80	20	347.031	755.25
3	8	3	55	65	20	399.88	979.455
3	8	4	55	60	20	399.88	979.455
3	8	5	55	85	20	371.794	779
3	8	6	55	85	20	371.794	779
3	8	7	55	80	20	354.057	748.2
3	8	8	55	95	20	354.057	748.2
3	8	9	55	95	20	353.972	764
3	8	10	55	85	20	353.972	764
3	8	11	55	95	20	361.526	677
3	8	12	55	95	20	361.526	677
3	8	13	55	80	20	353.229	636
3	8	14	55	95	20	353.229	636
3	8	15	55	55	20	352.037	755.385
3	8	16	55	80	20	352.037	755.385
3	8	17	55	90	20	332.378	708
3	8	18	55	95	20	332.378	708
3	8	19	55	90	20	357.342	717.5
3	8	20	55	100	20	357.342	717.5
3	8	1	60	95	20	350.282	702
3	8	2	60	100	20	350.282	702
3	8	3	60	80	20	408.242	849.2
3	8	4	60	85	20	408.242	849.2
3	8	5	60	100	20	379.625
3	8	6	60	100	20	379.625
3	8	7	60	100	20	344.175
3	8	8	60	100	20	344.175
3	8	9	60	100	20	357.231
3	8	10	60	95	20	357.231
3	8	11	60	95	20	355.73	652.5
3	8	12	60	90	20	355.73	652.5
3	8	13	60	100	20	355.1
3	8	14	60	100	20	355.1
3	8	15	60	95	20	358.026	688.5
3	8	16	60	95	20	358.026	688.5
3	8	17	60	95	20	346.821
3	8	18	60	100	20	346.821
3	8	19	60	95	20	336.513	687
3	8	20	60	100	20	336.513	687
3	8	1	65	95	20	349.667	3203
3	8	2	65	100	20	349.667	3203
3	8	3	65	90	20	394.139	1036.67
3	8	4	65	90	20	394.139	1036.67
3	8	5	65	95	20	367.179	632
3	8	6	65	100	20	367.179	632
3	8	7	65	100	20	356.75
3	8	8	65	100	20	356.75
3	8	9	65	100	20	365.744	370
3	8	10	65	95	20	365.744	370
3	8	11	65	100	20	368.075
3	8	12	65	100	20	368.075
3	8	13	65	100	20	367.568	727
3	8	14	65	85	20	367.568	727
3	8	15	65	95	20	337.59	671
3	8	16	65	100	20	337.59	671
3	8	17	65	95	20	355.385	664
3	8	18	65	100	20	355.385	664
3	8	19	65	100	20	336.15
3	8	20	65	100	20	336.15
3	8	1	75	100	20	339.075
3	8	2	75	100	20	339.075
3	8	3	75	95	20	371.342
3	8	4	75	95	20	371.342
3	8	5	75	100	20	352.4
3	8	6	75	100	20	352.4
3	8	7	75	100	20	354.35
3	8	8	75	100	20	354.35
3	8	9	75	100	20	341.65
3	8	10	75	100	20	341.65
3	8	11	75	100	20	378.275
3	8	12	75	100	20	378.275
3	8	13	75	100	20	358.1
3	8	14	75	100	20	358.1
3	8	15	75	100	20	364.1
3	8	16	75	100	20	364.1
3	8	17	75	100	20	351.925
3	8	18	75	100	20	351.925
3	8	19	75	95	20	342.526	461
3	8	20	75	95	20	342.526	461
3	8	1	100	100	20	351.275
3	8	2	100	100	20	351.275
3	8	3	100	90	20	384.351	1019
3	8	4	100	95	20	384.351	1019
3	8	5	100	95	20	383.135
3	8	6	100	90	20	383.135
3	8	7	100	100	20	362.975
3	8	8	100	100	20	362.975
3	8	9	100	100	20	354.3
3	8	10	100	100	20	354.3
3	8	11	100	95	20	374.846	377
3	8	12	100	100	20	374.846	377
3	8	13	100	100	20	348.282
3	8	14	100	95	20	348.282
3	8	15	100	100	20	359.35
3	8	16	100	100	20	359.35
3	8	17	100	95	20	351.692	1956
3	8	18	100	100	20	351.692	1956
3	8	19	100	95	20	345.395
3	8	20	100	95	20	345.395
3	9	1	0	0	20		622.237
3	9	2	0	0	20		622.237
3	9	3	0	0	20		509.079
3	9	4	0	0	20		509.079
3	9	5	0	0	20		515
3	9	6	0	0	20		515
3	9	7	0	0	20		602.974
3	9	8	0	0	20		602.974
3	9	9	0	0	20		565.525
3	9	10	0	0	20		565.525
3	9	11	0	0	20		642.4
3	9	12	0	0	20		642.4
3	9	13	0	0	20		805.105
3	9	14	0	0	20		805.105
3	9	15	0	0	20		600.5
3	9	16	0	0	20		600.5
3	9	17	0	0	20		583.077
3	9	18	0	0	20		583.077
3	9	19	0	0	20	513	614.789
3	9	20	0	5	20	513	614.789
3	9	1	25	0	20		617.154
3	9	2	25	0	20		617.154
3	9	3	25	0	20		513.351
3	9	4	25	0	20		513.351
3	9	5	25	0	20		534.154
3	9	6	25	0	20		534.154
3	9	7	25	0	20		554.737
3	9	8	25	0	20		554.737
3	9	9	25	0	20		589.075
3	9	10	25	0	20		589.075
3	9	11	25	0	20		691
3	9	12	25	0	20		691
3	9	13	25	0	20		713.975
3	9	14	25	0	20		713.975
3	9	15	25	0	20		675.5
3	9	16	25	0	20		675.5
3	9	17	25	0	20		642.333
3	9	18	25	0	20		642.333
3	9	19	25	0	20		625.282
3	9	20	25	0	20		625.282
3	9	1	35	0	20	511	721.692
3	9	2	35	5	20	511	721.692
3	9	3	35	0	20		612.9
3	9	4	35	0	20		612.9
3	9	5	35	10	20	425.667	637.432
3	9	6	35	5	20	425.667	637.432
3	9	7	35	5	20	599	670.316
3	9	8	35	0	20	599	670.316
3	9	9	35	0	20		674.725
3	9	10	35	0	20		674.725
3	9	11	35	0	20		611.45
3	9	12	35	0	20		611.45
3	9	13	35	0	20		815.553
3	9	14	35	0	20		815.553
3	9	15	35	0	20		626.75
3	9	16	35	0	20		626.75
3	9	17	35	5	20	543	607.382
3	9	18	35	10	20	543	607.382
3	9	19	35	0	20	804	708.947
3	9	20	35	5	20	804	708.947
3	9	1	40	10	20	456	823.235
3	9	2	40	10	20	456	823.235
3	9	3	40	20	20	451	802.939
3	9	4	40	15	20	451	802.939
3	9	5	40	15	20	469.333	811
3	9	6	40	15	20	469.333	811
3	9	7	40	0	20	561	772.559
3	9	8	40	10	20	561	772.559
3	9	9	40	5	20	551.5	729.368
3	9	10	40	5	20	551.5	729.368
3	9	11	40	5	20	428	712.053
3	9	12	40	0	20	428	712.053
3	9	13	40	0	20	447	832.513
3	9	14	40	5	20	447	832.513
3	9	15	40	10	20	438.5	706.632
3	9	16	40	0	20	438.5	706.632
3	9	17	40	5	20	639	779.235
3	9	18	40	0	20	639	779.235
3	9	19	40	5	20	406	694.077
3	9	20	40	0	20	406	694.077
3	9	1	45	40	20	457.952	945.235
3	9	2	45	65	20	457.952	945.235
3	9	3	45	35	20	468	804.56
3	9	4	45	40	20	468	804.56
3	9	5	45	40	20	447.3	815.85
3	9	6	45	60	20	447.3	815.85
3	9	7	45	40	20	480.769	831.5
3	9	8	45	25	20	480.769	831.5
3	9	9	45	15	20	530.556	935.067
3	9	10	45	30	20	530.556	935.067
3	9	11	45	25	20	427	691.903
3	9	12	45	15	20	427	691.903
3	9	13	45	5	20	487	966.824
3	9	14	45	10	20	487	966.824
3	9	15	45	25	20	482.75	790
3	9	16	45	15	20	482.75	790
3	9	17	45	15	20	474.714	888.167
3	9	18	45	20	20	474.714	888.167
3	9	19	45	35	20	443.8	779.966
3	9	20	45	15	20	443.8	779.966
3	9	1	50	60	20	452.464	1147.55
3	9	2	50	80	20	452.464	1147.55
3	9	3	50	80	20	425.75	780.167
3	9	4	50	80	20	425.75	780.167
3	9	5	50	85	20	435.806	1016.56
3	9	6	50	70	20	435.806	1016.56
3	9	7	50	60	20	437.955	1029
3	9	8	50	50	20	437.955	1029
3	9	9	50	65	20	464.346	845.545
3	9	10	50	65	20	464.346	845.545
3	9	11	50	65	20	461.5	858.118
3	9	12	50	45	20	461.5	858.118
3	9	13	50	40	20	508.882	1095.29
3	9	14	50	45	20	508.882	1095.29
3	9	15	50	45	20	492.25	821.238
3	9	16	50	35	20	492.25	821.238
3	9	17	50	50	20	475.842	807.882
3	9	18	50	45	20	475.842	807.882
3	9	19	50	55	20	445.92	851.867
3	9	20	50	70	20	445.92	851.867
3	9	1	55	85	20	439.529	1033.83
3	9	2	55	85	20	439.529	1033.83
3	9	3	55	95	20	411.189	1140
3	9	4	55	90	20	411.189	1140
3	9	5	55	85	20	422.486	680.333
3	9	6	55	100	20	422.486	680.333
3	9	7	55	55	20	431.233	966.125
3	9	8	55	95	20	431.233	966.125
3	9	9	55	100	20	459.103
3	9	10	55	95	20	459.103
3	9	11	55	70	20	414.133	1058.44
3	9	12	55	80	20	414.133	1058.44
3	9	13	55	65	20	472.2	1342.73
3	9	14	55	60	20	472.2	1342.73
3	9	15	55	85	20	469.233	936.1
3	9	16	55	65	20	469.233	936.1
3	9	17	55	75	20	459.176	1034.6
3	9	18	55	95	20	459.176	1034.6
3	9	19	55	80	20	438.5	713.125
3	9	20	55	80	20	438.5	713.125
3	9	1	60	95	20	448.538	637
3	9	2	60	100	20	448.538	637
3	9	3	60	90	20	403.028	1464
3	9	4	60	90	20	403.028	1464
3	9	5	60	100	20	408.194	422
3	9	6	60	80	20	408.194	422
3	9	7	60	95	20	402.103	393
3	9	8	60	100	20	402.103	393
3	9	9	60	95	20	443.158
3	9	10	60	95	20	443.158
3	9	11	60	90	20	423.306	1547.33
3	9	12	60	90	20	423.306	1547.33
3	9	13	60	80	20	505.094	1249.25
3	9	14	60	80	20	505.094	1249.25
3	9	15	60	90	20	425.371	544.4
3	9	16	60	85	20	425.371	544.4
3	9	17	60	90	20	445.737	1240
3	9	18	60	100	20	445.737	1240
3	9	19	60	90	20	441.842	680
3	9	20	60	100	20	441.842	680
3	9	1	65	95	20	425.462	645
3	9	2	65	100	20	425.462	645
3	9	3	65	100	20	414.541	222
3	9	4	65	85	20	414.541	222
3	9	5	65	100	20	401.025
3	9	6	65	100	20	401.025
3	9	7	65	80	20	404.694	1626
3	9	8	65	100	20	404.694	1626
3	9	9	65	100	20	448.875
3	9	10	65	100	20	448.875
3	9	11	65	100	20	417.684	1241
3	9	12	65	90	20	417.684	1241
3	9	13	65	95	20	471.944	878.5
3	9	14	65	85	20	471.944	878.5
3	9	15	65	90	20	444.237	2072
3	9	16	65	100	20	444.237	2072
3	9	17	65	90	20	437.184	1562
3	9	18	65	100	20	437.184	1562
3	9	19	65	90	20	435.676	496
3	9	20	65	95	20	435.676	496
3	9	1	75	100	20	437.5
3	9	2	75	90	20	437.5
3	9	3	75	100	20	402.306
3	9	4	75	80	20	402.306
3	9	5	75	95	20	399.947	2649
3	9	6	75	95	20	399.947	2649
3	9	7	75	80	20	407.371
3	9	8	75	95	20	407.371
3	9	9	75	100	20	446.475
3	9	10	75	100	20	446.475
3	9	11	75	100	20	409.103	694
3	9	12	75	95	20	409.103	694
3	9	13	75	100	20	501.541	482
3	9	14	75	85	20	501.541	482
3	9	15	75	95	20	439.256	1065
3	9	16	75	100	20	439.256	1065
3	9	17	75	100	20	432.41	1416
3	9	18	75	95	20	432.41	1416
3	9	19	75	90	20	445.703	399.5
3	9	20	75	95	20	445.703	399.5
3	9	1	100	100	20	420.949	319
3	9	2	100	95	20	420.949	319
3	9	3	100	100	20	409.85
3	9	4	100	100	20	409.85
3	9	5	100	90	20	406.027	638.667
3	9	6	100	95	20	406.027	638.667
3	9	7	100	90	20	411.135
3	9	8	100	95	20	411.135
3	9	9	100	95	20	457.395
3	9	10	100	95	20	457.395
3	9	11	100	100	20	414.6
3	9	12	100	100	20	414.6
3	9	13	100	95	20	478.205
3	9	14	100	100	20	478.205
3	9	15	100	100	20	437.25
3	9	16	100	100	20	437.25
3	9	17	100	90	20	440
3	9	18	100	90	20	440
3	9	19	100	100	20	445.65
3	9	20	100	100	20	445.65
