# Supplementary material for: Perceptual processing in the ventral visual stream requires area TE but not rhinal cortex
Source: eLife. 2018 Oct 12;7:e36310. doi: 10.7554/eLife.36310 (PMC6207425; doi:10.7554/eLife.36310)
Supplement: Figure 4—source data 1. [file elife-36310-fig4-data1.xlsx]

## Sheet: contrast_sensitivity (2)
Treatment group	monkey ID	frequency	contrast threshold		Data used to produce figures in the paper: Perceptual processing in the ventral visual stream requires area TE but not rhinal cortex Authors: Mark A. G. Eldridge1*, Narihisa Matsumoto2, John H. Wittig3, Evan C. Masseau1, Richard C. Saunders1, Barry J. Richmond1* 6/4/2018
1	1	0.125	25		Column 1 ('Treatment group') indicates treatment type: 1 = control, 2 = TE lesion, 3 = Rh lesion.
1	1	0.25	50
1	1	0.5	100
1	1	1	100
1	1	2	100
1	1	4	25
1	1	8	6.25
1	1	16	1.5625
1	2	0.125	50
1	2	0.25	100
1	2	0.5	200
1	2	1	200
1	2	2	100
1	2	4	50
1	2	8	6.25
1	2	16	3.125
1	3	0.125	50
1	3	0.25	200
1	3	0.5	200
1	3	1	200
1	3	2	200
1	3	4	200
1	3	8	50
1	3	16	25
2	4	0.125	25
2	4	0.25	25
2	4	0.5	25
2	4	1	50
2	4	2	50
2	4	4	50
2	4	8	50
2	4	16	6.25
2	5	0.125	50
2	5	0.25	100
2	5	0.5	100
2	5	1	200
2	5	2	100
2	5	4	100
2	5	8	25
2	5	16	6.25
2	6	0.125	50
2	6	0.25	200
2	6	0.5	200
2	6	1	200
2	6	2	100
2	6	4	6.25
2	6	8	6.25
2	6	16	1.5625
3	7	0.125	25
3	7	0.25	50
3	7	0.5	50
3	7	1	50
3	7	2	50
3	7	4	50
3	7	8	25
3	7	16	6.25
3	8	0.125	100
3	8	0.25	200
3	8	0.5	200
3	8	1	200
3	8	2	200
3	8	4	100
3	8	8	50
3	8	16	12.5
3	9	0.125	12.5
3	9	0.25	12.5
3	9	0.5	50
3	9	1	50
3	9	2	50
3	9	4	25
3	9	8	3.125
3	9	16	1.5625
