# Supplementary material for: Perceptual processing in the ventral visual stream requires area TE but not rhinal cortex
Source: eLife. 2018 Oct 12;7:e36310. doi: 10.7554/eLife.36310 (PMC6207425; doi:10.7554/eLife.36310)
Supplement: Figure 5—source data 1. [file elife-36310-fig5-data1.xlsx]

## Sheet: exp 3 (2)
Treatment group	monkey ID	session #	morph_level(%)	mask_ID	mask_present	pct.rog	weight (# of trials per session)		Data used to produce figures in the paper: Perceptual processing in the ventral visual stream requires area TE but not rhinal cortex Authors: Mark A. G. Eldridge1*, Narihisa Matsumoto2, John H. Wittig3, Evan C. Masseau1, Richard C. Saunders1, Barry J. Richmond1* 6/4/2018
1	1	1	0	0	0	0	21		Column 1 ('Treatment group') indicates treatment type: 1 = control, 2 = TE lesion, 3 = Rh lesion.
1	1	1	25	0	0	0	20
1	1	1	35	0	0	0	20
1	1	1	40	0	0	10	20
1	1	1	45	0	0	15	20
1	1	1	50	0	0	60	20
1	1	1	55	0	0	80	20
1	1	1	60	0	0	95	20
1	1	1	65	0	0	95	20
1	1	1	75	0	0	95	20
1	1	1	100	0	0	95	20
1	2	1	0	0	0	0	20
1	2	1	25	0	0	0	20
1	2	1	35	0	0	0	20
1	2	1	40	0	0	10	20
1	2	1	45	0	0	52.381	21
1	2	1	50	0	0	65	20
1	2	1	55	0	0	85	20
1	2	1	60	0	0	80	20
1	2	1	65	0	0	100	20
1	2	1	75	0	0	95	20
1	2	1	100	0	0	85	20
1	3	1	0	0	0	0	20
1	3	1	25	0	0	0	20
1	3	1	35	0	0	0	20
1	3	1	40	0	0	40	20
1	3	1	45	0	0	50	20
1	3	1	50	0	0	85	20
1	3	1	55	0	0	90	20
1	3	1	60	0	0	90	20
1	3	1	65	0	0	100	20
1	3	1	75	0	0	95	20
1	3	1	100	0	0	95	20
2	4	1	0	0	0	5	20
2	4	1	25	0	0	15	20
2	4	1	35	0	0	35	20
2	4	1	40	0	0	10	20
2	4	1	45	0	0	70	20
2	4	1	50	0	0	71.4286	21
2	4	1	55	0	0	70	20
2	4	1	60	0	0	60	20
2	4	1	65	0	0	70	20
2	4	1	75	0	0	80	20
2	4	1	100	0	0	80	20
2	5	1	0	0	0	0	20
2	5	1	25	0	0	30	20
2	5	1	35	0	0	25	20
2	5	1	40	0	0	65	20
2	5	1	45	0	0	75	20
2	5	1	50	0	0	90	20
2	5	1	55	0	0	95	20
2	5	1	60	0	0	95	20
2	5	1	65	0	0	100	20
2	5	1	75	0	0	100	20
2	5	1	100	0	0	100	20
2	6	1	0	0	0	0	20
2	6	1	25	0	0	5	20
2	6	1	35	0	0	30	20
2	6	1	40	0	0	47.619	21
2	6	1	45	0	0	70	20
2	6	1	50	0	0	90	20
2	6	1	55	0	0	100	20
2	6	1	60	0	0	100	20
2	6	1	65	0	0	100	20
2	6	1	75	0	0	100	20
2	6	1	100	0	0	100	20
3	7	1	0	0	0	0	20
3	7	1	25	0	0	0	20
3	7	1	35	0	0	0	20
3	7	1	40	0	0	10	20
3	7	1	45	0	0	40	20
3	7	1	50	0	0	70	20
3	7	1	55	0	0	95	20
3	7	1	60	0	0	100	20
3	7	1	65	0	0	100	20
3	7	1	75	0	0	100	20
3	7	1	100	0	0	100	20
3	8	1	0	0	0	0	20
3	8	1	25	0	0	10	20
3	8	1	35	0	0	25	20
3	8	1	40	0	0	40	20
3	8	1	45	0	0	60	20
3	8	1	50	0	0	90	20
3	8	1	55	0	0	95	20
3	8	1	60	0	0	100	20
3	8	1	65	0	0	95	20
3	8	1	75	0	0	100	20
3	8	1	100	0	0	100	20
3	9	1	0	0	0	0	20
3	9	1	25	0	0	5	20
3	9	1	35	0	0	5	20
3	9	1	40	0	0	15	20
3	9	1	45	0	0	30	20
3	9	1	50	0	0	85	20
3	9	1	55	0	0	100	20
3	9	1	60	0	0	95	20
3	9	1	65	0	0	95	20
3	9	1	75	0	0	95	20
3	9	1	100	0	0	100	20
1	1	1	0	1	1	10	20
1	1	1	0	2	1	10	20
1	1	1	0	3	1	5	20
1	1	1	0	4	1	0	20
1	1	1	25	1	1	5	20
1	1	1	25	2	1	15	20
1	1	1	25	3	1	14.2857	21
1	1	1	25	4	1	40	20
1	1	1	35	1	1	25	20
1	1	1	35	2	1	50	20
1	1	1	35	3	1	15	20
1	1	1	35	4	1	70	20
1	1	1	40	1	1	40	20
1	1	1	40	2	1	45	20
1	1	1	40	3	1	20	20
1	1	1	40	4	1	65	20
1	1	1	45	1	1	55	20
1	1	1	45	2	1	60	20
1	1	1	45	3	1	45	20
1	1	1	45	4	1	80	20
1	1	1	50	1	1	65	20
1	1	1	50	2	1	50	20
1	1	1	50	3	1	50	20
1	1	1	50	4	1	90	20
1	1	1	55	1	1	80	20
1	1	1	55	2	1	70	20
1	1	1	55	3	1	75	20
1	1	1	55	4	1	90	20
1	1	1	60	1	1	80	20
1	1	1	60	2	1	80	20
1	1	1	60	3	1	80	20
1	1	1	60	4	1	100	20
1	1	1	65	1	1	80	20
1	1	1	65	2	1	90	20
1	1	1	65	3	1	90	20
1	1	1	65	4	1	95	20
1	1	1	75	1	1	95	20
1	1	1	75	2	1	95	20
1	1	1	75	3	1	100	20
1	1	1	75	4	1	100	20
1	1	1	100	1	1	95	20
1	1	1	100	2	1	100	20
1	1	1	100	3	1	100	20
1	1	1	100	4	1	100	20
1	2	1	0	1	1	0	20
1	2	1	0	2	1	0	20
1	2	1	0	3	1	5	20
1	2	1	0	4	1	10	20
1	2	1	25	1	1	0	20
1	2	1	25	2	1	5	20
1	2	1	25	3	1	0	20
1	2	1	25	4	1	25	20
1	2	1	35	1	1	20	20
1	2	1	35	2	1	5	20
1	2	1	35	3	1	15	20
1	2	1	35	4	1	10	20
1	2	1	40	1	1	19.0476	21
1	2	1	40	2	1	25	20
1	2	1	40	3	1	20	20
1	2	1	40	4	1	50	20
1	2	1	45	1	1	30	20
1	2	1	45	2	1	55	20
1	2	1	45	3	1	45	20
1	2	1	45	4	1	60	20
1	2	1	50	1	1	75	20
1	2	1	50	2	1	75	20
1	2	1	50	3	1	65	20
1	2	1	50	4	1	80	20
1	2	1	55	1	1	90	20
1	2	1	55	2	1	80	20
1	2	1	55	3	1	95	20
1	2	1	55	4	1	80	20
1	2	1	60	1	1	90	20
1	2	1	60	2	1	95	20
1	2	1	60	3	1	70	20
1	2	1	60	4	1	90	20
1	2	1	65	1	1	95	20
1	2	1	65	2	1	90	20
1	2	1	65	3	1	85	20
1	2	1	65	4	1	85	20
1	2	1	75	1	1	95	20
1	2	1	75	2	1	90	20
1	2	1	75	3	1	90	20
1	2	1	75	4	1	70	20
1	2	1	100	1	1	80	20
1	2	1	100	2	1	95	20
1	2	1	100	3	1	75	20
1	2	1	100	4	1	95	20
1	3	1	0	1	1	0	21
1	3	1	0	2	1	15	20
1	3	1	0	3	1	0	20
1	3	1	0	4	1	25	20
1	3	1	25	1	1	5	20
1	3	1	25	2	1	15	20
1	3	1	25	3	1	5	20
1	3	1	25	4	1	45	20
1	3	1	35	1	1	45	20
1	3	1	35	2	1	50	20
1	3	1	35	3	1	20	20
1	3	1	35	4	1	60	20
1	3	1	40	1	1	75	20
1	3	1	40	2	1	60	20
1	3	1	40	3	1	30	20
1	3	1	40	4	1	60	20
1	3	1	45	1	1	75	20
1	3	1	45	2	1	55	20
1	3	1	45	3	1	65	20
1	3	1	45	4	1	85	20
1	3	1	50	1	1	85	20
1	3	1	50	2	1	75	20
1	3	1	50	3	1	80	20
1	3	1	50	4	1	75	20
1	3	1	55	1	1	100	20
1	3	1	55	2	1	95	20
1	3	1	55	3	1	100	20
1	3	1	55	4	1	70	20
1	3	1	60	1	1	90	20
1	3	1	60	2	1	95	20
1	3	1	60	3	1	95	20
1	3	1	60	4	1	90	20
1	3	1	65	1	1	80	20
1	3	1	65	2	1	80	20
1	3	1	65	3	1	85	20
1	3	1	65	4	1	90	20
1	3	1	75	1	1	95	20
1	3	1	75	2	1	95	20
1	3	1	75	3	1	100	20
1	3	1	75	4	1	80	20
1	3	1	100	1	1	90	20
1	3	1	100	2	1	100	20
1	3	1	100	3	1	85	20
1	3	1	100	4	1	76.1905	21
2	4	1	0	1	1	25	20
2	4	1	0	2	1	45	20
2	4	1	0	3	1	55	20
2	4	1	0	4	1	65	20
2	4	1	25	1	1	40	20
2	4	1	25	2	1	55	20
2	4	1	25	3	1	65	20
2	4	1	25	4	1	60	20
2	4	1	35	1	1	35	20
2	4	1	35	2	1	35	20
2	4	1	35	3	1	71.4286	21
2	4	1	35	4	1	60	20
2	4	1	40	1	1	40	20
2	4	1	40	2	1	60	20
2	4	1	40	3	1	85	20
2	4	1	40	4	1	80	20
2	4	1	45	1	1	45	20
2	4	1	45	2	1	45	20
2	4	1	45	3	1	75	20
2	4	1	45	4	1	85	20
2	4	1	50	1	1	40	20
2	4	1	50	2	1	65	20
2	4	1	50	3	1	90	20
2	4	1	50	4	1	75	20
2	4	1	55	1	1	40	20
2	4	1	55	2	1	40	20
2	4	1	55	3	1	60	20
2	4	1	55	4	1	80	20
2	4	1	60	1	1	45	20
2	4	1	60	2	1	55	20
2	4	1	60	3	1	75	20
2	4	1	60	4	1	55	20
2	4	1	65	1	1	30	20
2	4	1	65	2	1	40	20
2	4	1	65	3	1	90	20
2	4	1	65	4	1	70	20
2	4	1	75	1	1	45	20
2	4	1	75	2	1	40	20
2	4	1	75	3	1	75	20
2	4	1	75	4	1	70	20
2	4	1	100	1	1	45	20
2	4	1	100	2	1	50	20
2	4	1	100	3	1	80	20
2	4	1	100	4	1	70	20
2	5	1	0	1	1	40	20
2	5	1	0	2	1	45	20
2	5	1	0	3	1	70	20
2	5	1	0	4	1	55	20
2	5	1	25	1	1	75	20
2	5	1	25	2	1	70	20
2	5	1	25	3	1	70	20
2	5	1	25	4	1	75	20
2	5	1	35	1	1	80.9524	21
2	5	1	35	2	1	90	20
2	5	1	35	3	1	85	20
2	5	1	35	4	1	80	20
2	5	1	40	1	1	70	20
2	5	1	40	2	1	100	20
2	5	1	40	3	1	95	20
2	5	1	40	4	1	80	20
2	5	1	45	1	1	95	20
2	5	1	45	2	1	90	20
2	5	1	45	3	1	100	20
2	5	1	45	4	1	76.1905	21
2	5	1	50	1	1	85	20
2	5	1	50	2	1	95	20
2	5	1	50	3	1	95	20
2	5	1	50	4	1	90	20
2	5	1	55	1	1	95	20
2	5	1	55	2	1	90	20
2	5	1	55	3	1	100	20
2	5	1	55	4	1	80	20
2	5	1	60	1	1	95	20
2	5	1	60	2	1	100	20
2	5	1	60	3	1	95	20
2	5	1	60	4	1	85	20
2	5	1	65	1	1	95	20
2	5	1	65	2	1	100	20
2	5	1	65	3	1	100	20
2	5	1	65	4	1	95	20
2	5	1	75	1	1	100	20
2	5	1	75	2	1	95	20
2	5	1	75	3	1	95	20
2	5	1	75	4	1	95	20
2	5	1	100	1	1	90	20
2	5	1	100	2	1	95	20
2	5	1	100	3	1	95	20
2	5	1	100	4	1	90	20
2	6	1	0	1	1	20	20
2	6	1	0	2	1	0	20
2	6	1	0	3	1	10	20
2	6	1	0	4	1	10	20
2	6	1	25	1	1	40	20
2	6	1	25	2	1	20	20
2	6	1	25	3	1	25	20
2	6	1	25	4	1	35	20
2	6	1	35	1	1	60	20
2	6	1	35	2	1	60	20
2	6	1	35	3	1	40	20
2	6	1	35	4	1	45	20
2	6	1	40	1	1	60	20
2	6	1	40	2	1	50	20
2	6	1	40	3	1	70	20
2	6	1	40	4	1	75	20
2	6	1	45	1	1	65	20
2	6	1	45	2	1	50	20
2	6	1	45	3	1	90	20
2	6	1	45	4	1	80	20
2	6	1	50	1	1	70	20
2	6	1	50	2	1	75	20
2	6	1	50	3	1	90	20
2	6	1	50	4	1	80.9524	21
2	6	1	55	1	1	85	20
2	6	1	55	2	1	80	20
2	6	1	55	3	1	95	20
2	6	1	55	4	1	80	20
2	6	1	60	1	1	80	20
2	6	1	60	2	1	85	20
2	6	1	60	3	1	95	20
2	6	1	60	4	1	90	20
2	6	1	65	1	1	100	20
2	6	1	65	2	1	95	20
2	6	1	65	3	1	95	20
2	6	1	65	4	1	90	20
2	6	1	75	1	1	85	20
2	6	1	75	2	1	100	20
2	6	1	75	3	1	95	20
2	6	1	75	4	1	100	20
2	6	1	100	1	1	100	20
2	6	1	100	2	1	95	20
2	6	1	100	3	1	100	20
2	6	1	100	4	1	95	20
3	7	1	0	1	1	10	20
3	7	1	0	2	1	0	20
3	7	1	0	3	1	0	20
3	7	1	0	4	1	15	20
3	7	1	25	1	1	10	20
3	7	1	25	2	1	30	20
3	7	1	25	3	1	20	20
3	7	1	25	4	1	40	20
3	7	1	35	1	1	30	20
3	7	1	35	2	1	40	20
3	7	1	35	3	1	25	20
3	7	1	35	4	1	65	20
3	7	1	40	1	1	50	20
3	7	1	40	2	1	50	20
3	7	1	40	3	1	25	20
3	7	1	40	4	1	80.9524	21
3	7	1	45	1	1	45	20
3	7	1	45	2	1	65	20
3	7	1	45	3	1	50	20
3	7	1	45	4	1	85	20
3	7	1	50	1	1	75	20
3	7	1	50	2	1	76.1905	21
3	7	1	50	3	1	75	20
3	7	1	50	4	1	80	20
3	7	1	55	1	1	80	20
3	7	1	55	2	1	80	20
3	7	1	55	3	1	80	20
3	7	1	55	4	1	90	20
3	7	1	60	1	1	90	20
3	7	1	60	2	1	80	20
3	7	1	60	3	1	85	20
3	7	1	60	4	1	80	20
3	7	1	65	1	1	85	20
3	7	1	65	2	1	95	20
3	7	1	65	3	1	90	20
3	7	1	65	4	1	85	20
3	7	1	75	1	1	90	20
3	7	1	75	2	1	80	20
3	7	1	75	3	1	95	20
3	7	1	75	4	1	95	20
3	7	1	100	1	1	95	20
3	7	1	100	2	1	100	20
3	7	1	100	3	1	100	20
3	7	1	100	4	1	100	20
3	8	1	0	1	1	0	20
3	8	1	0	2	1	0	20
3	8	1	0	3	1	0	20
3	8	1	0	4	1	5	20
3	8	1	25	1	1	10	20
3	8	1	25	2	1	0	20
3	8	1	25	3	1	0	20
3	8	1	25	4	1	33.3333	21
3	8	1	35	1	1	10	20
3	8	1	35	2	1	25	20
3	8	1	35	3	1	10	20
3	8	1	35	4	1	55	20
3	8	1	40	1	1	50	20
3	8	1	40	2	1	40	20
3	8	1	40	3	1	20	20
3	8	1	40	4	1	55	20
3	8	1	45	1	1	50	20
3	8	1	45	2	1	55	20
3	8	1	45	3	1	70	20
3	8	1	45	4	1	50	20
3	8	1	50	1	1	80	20
3	8	1	50	2	1	75	20
3	8	1	50	3	1	100	20
3	8	1	50	4	1	80	20
3	8	1	55	1	1	80	20
3	8	1	55	2	1	85	20
3	8	1	55	3	1	95	20
3	8	1	55	4	1	80	20
3	8	1	60	1	1	85	20
3	8	1	60	2	1	100	20
3	8	1	60	3	1	95	20
3	8	1	60	4	1	90	20
3	8	1	65	1	1	90	20
3	8	1	65	2	1	85	20
3	8	1	65	3	1	95	20
3	8	1	65	4	1	100	20
3	8	1	75	1	1	100	20
3	8	1	75	2	1	95	20
3	8	1	75	3	1	100	20
3	8	1	75	4	1	95	20
3	8	1	100	1	1	90	20
3	8	1	100	2	1	95	20
3	8	1	100	3	1	100	20
3	8	1	100	4	1	76.1905	21
3	9	1	0	1	1	0	20
3	9	1	0	2	1	0	20
3	9	1	0	3	1	0	20
3	9	1	0	4	1	9.52381	21
3	9	1	25	1	1	0	20
3	9	1	25	2	1	0	20
3	9	1	25	3	1	0	20
3	9	1	25	4	1	0	20
3	9	1	35	1	1	20	20
3	9	1	35	2	1	0	20
3	9	1	35	3	1	5	20
3	9	1	35	4	1	35	20
3	9	1	40	1	1	25	20
3	9	1	40	2	1	15	20
3	9	1	40	3	1	20	20
3	9	1	40	4	1	40	20
3	9	1	45	1	1	50	20
3	9	1	45	2	1	33.3333	21
3	9	1	45	3	1	40	20
3	9	1	45	4	1	45	20
3	9	1	50	1	1	75	20
3	9	1	50	2	1	45	20
3	9	1	50	3	1	60	20
3	9	1	50	4	1	75	20
3	9	1	55	1	1	65	20
3	9	1	55	2	1	65	20
3	9	1	55	3	1	85	20
3	9	1	55	4	1	80	20
3	9	1	60	1	1	80	20
3	9	1	60	2	1	75	20
3	9	1	60	3	1	90	20
3	9	1	60	4	1	95	20
3	9	1	65	1	1	90	20
3	9	1	65	2	1	90	20
3	9	1	65	3	1	95	20
3	9	1	65	4	1	90	20
3	9	1	75	1	1	85	20
3	9	1	75	2	1	80	20
3	9	1	75	3	1	95	20
3	9	1	75	4	1	100	20
3	9	1	100	1	1	100	20
3	9	1	100	2	1	95	20
3	9	1	100	3	1	100	20
3	9	1	100	4	1	100	20
