# Supplementary material for: Perceptual processing in the ventral visual stream requires area TE but not rhinal cortex
Source: eLife. 2018 Oct 12;7:e36310. doi: 10.7554/eLife.36310 (PMC6207425; doi:10.7554/eLife.36310)
Supplement: Figure 6—source data 1. [file elife-36310-fig6-data1.xlsx]

## Sheet: exp 4 (2)
Treatment group	monkey ID	session #	morph_level(%)	pct.rog	weight (# of trials per session)		Data used to produce figures in the paper: Perceptual processing in the ventral visual stream requires area TE but not rhinal cortex Authors: Mark A. G. Eldridge1*, Narihisa Matsumoto2, John H. Wittig3, Evan C. Masseau1, Richard C. Saunders1, Barry J. Richmond1* 6/4/2018
1	1	1	0	0	40		Column 1 ('Treatment group') indicates treatment type: 1 = control, 2 = TE lesion, 3 = Rh lesion.
1	1	1	10	0	40
1	1	1	20	10	40
1	1	1	30	10	40
1	1	1	40	30	40
1	1	1	50	57.5	40
1	1	1	60	90	40
1	1	1	70	95	40
1	1	1	80	100	40
1	1	1	90	100	40
1	1	1	100	100	40
1	2	1	0	0	40
1	2	1	10	0	40
1	2	1	20	5	40
1	2	1	30	12.5	40
1	2	1	40	37.5	40
1	2	1	50	57.5	40
1	2	1	60	72.5	40
1	2	1	70	92.5	40
1	2	1	80	95	40
1	2	1	90	97.5	40
1	2	1	100	97.5	40
1	3	1	0	7.5	40
1	3	1	10	5	40
1	3	1	20	10	40
1	3	1	30	12.5	40
1	3	1	40	27.5	40
1	3	1	50	67.5	40
1	3	1	60	82.5	40
1	3	1	70	90	40
1	3	1	80	85	40
1	3	1	90	90	40
1	3	1	100	80	40
2	4	1	0	27.5	40
2	4	1	10	32.5	40
2	4	1	20	42.5	40
2	4	1	30	40	40
2	4	1	40	47.5	40
2	4	1	50	67.5	40
2	4	1	60	87.5	40
2	4	1	70	87.5	40
2	4	1	80	90	40
2	4	1	90	90	40
2	4	1	100	75	40
2	5	1	0	15	40
2	5	1	10	27.5	40
2	5	1	20	47.5	40
2	5	1	30	52.5	40
2	5	1	40	62.5	40
2	5	1	50	72.5	40
2	5	1	60	87.5	40
2	5	1	70	95	40
2	5	1	80	97.5	40
2	5	1	90	92.5	40
2	5	1	100	87.5	40
2	6	1	0	10	40
2	6	1	10	22.5	40
2	6	1	20	25	40
2	6	1	30	57.5	40
2	6	1	40	65	40
2	6	1	50	85	40
2	6	1	60	92.5	40
2	6	1	70	95	40
2	6	1	80	100	40
2	6	1	90	97.5	40
2	6	1	100	100	40
3	7	1	0	2.5	40
3	7	1	10	0	40
3	7	1	20	5	40
3	7	1	30	17.5	40
3	7	1	40	40	40
3	7	1	50	52.5	40
3	7	1	60	82.5	40
3	7	1	70	92.5	40
3	7	1	80	97.5	40
3	7	1	90	97.5	40
3	7	1	100	95	40
3	8	1	0	0	40
3	8	1	10	2.5	40
3	8	1	20	10	40
3	8	1	30	25	40
3	8	1	40	57.5	40
3	8	1	50	82.5	40
3	8	1	60	97.5	40
3	8	1	70	97.5	40
3	8	1	80	95	40
3	8	1	90	97.5	40
3	8	1	100	97.5	40
3	9	1	0	0	40
3	9	1	10	0	40
3	9	1	20	2.5	40
3	9	1	30	22.5	40
3	9	1	40	50	40
3	9	1	50	70	40
3	9	1	60	82.5	40
3	9	1	70	95	40
3	9	1	80	95	40
3	9	1	90	97.5	40
3	9	1	100	97.5	40
