# Supplementary figures and images for: Perceptual processing in the ventral visual stream requires area TE but not rhinal cortex
Source: eLife journal article supplement (doi:10.7554/elife.36310), 2018-10-12

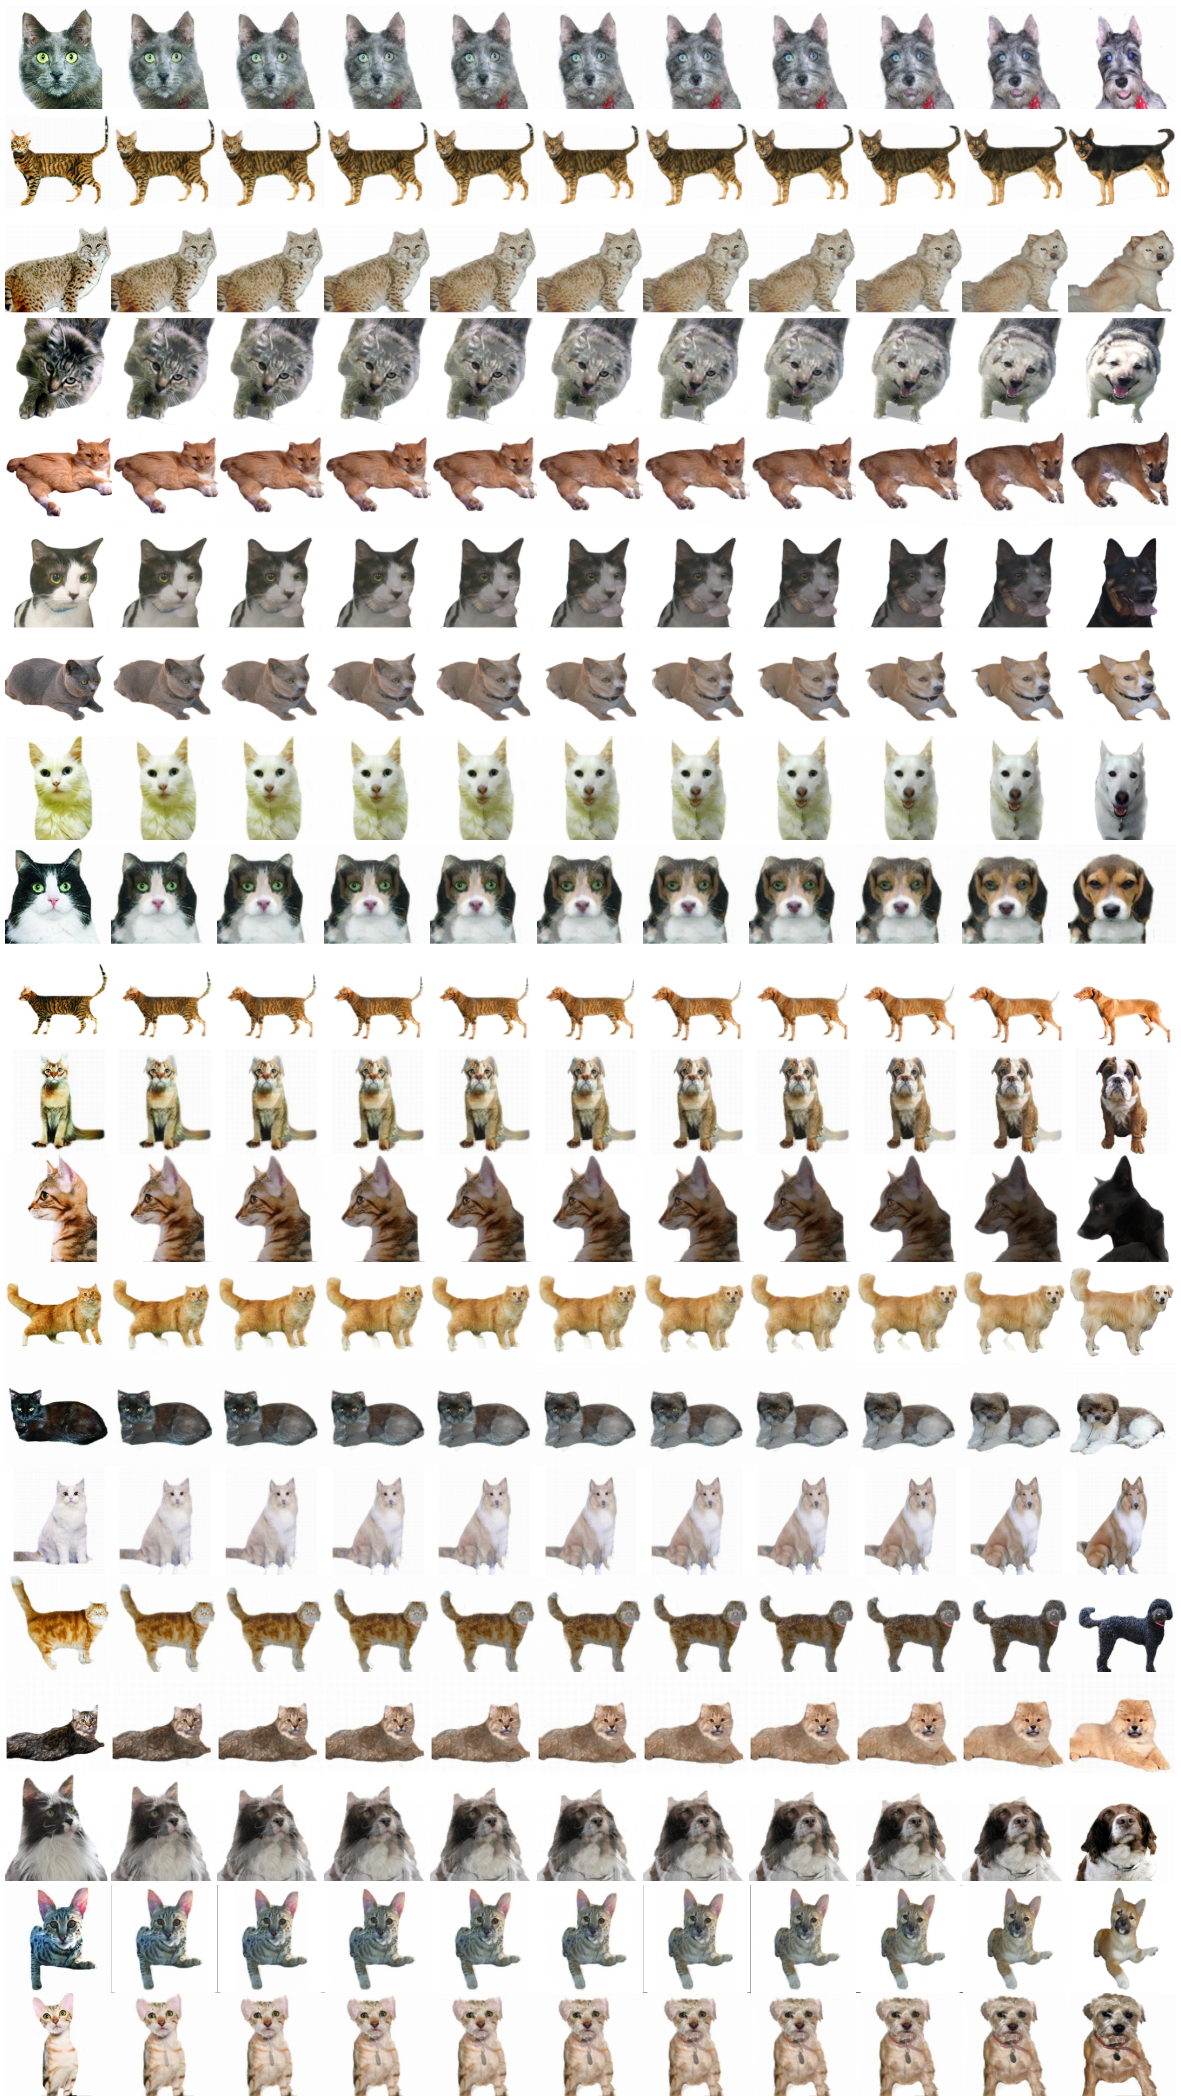

0 25 35 40 45 50 55 60 65 75 100

% Dog

Supplement: supp [file elife-36310-supp-v1.zip]

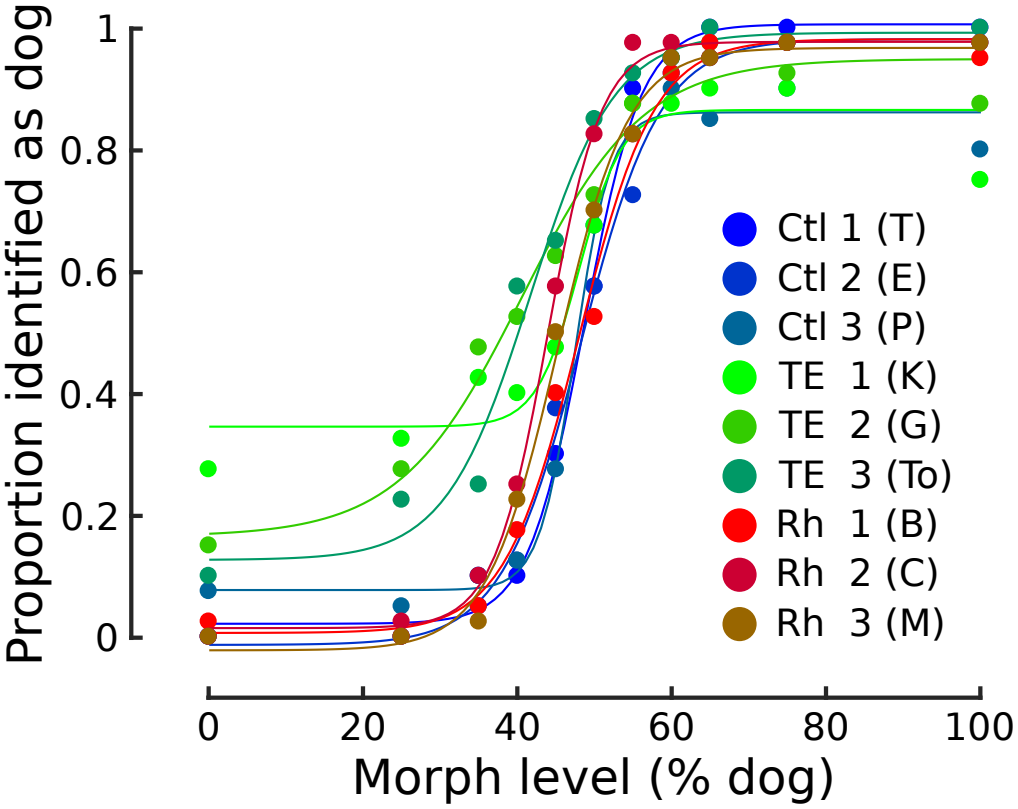

Supplement: supp [file elife-36310-supp-v1.zip]

**A**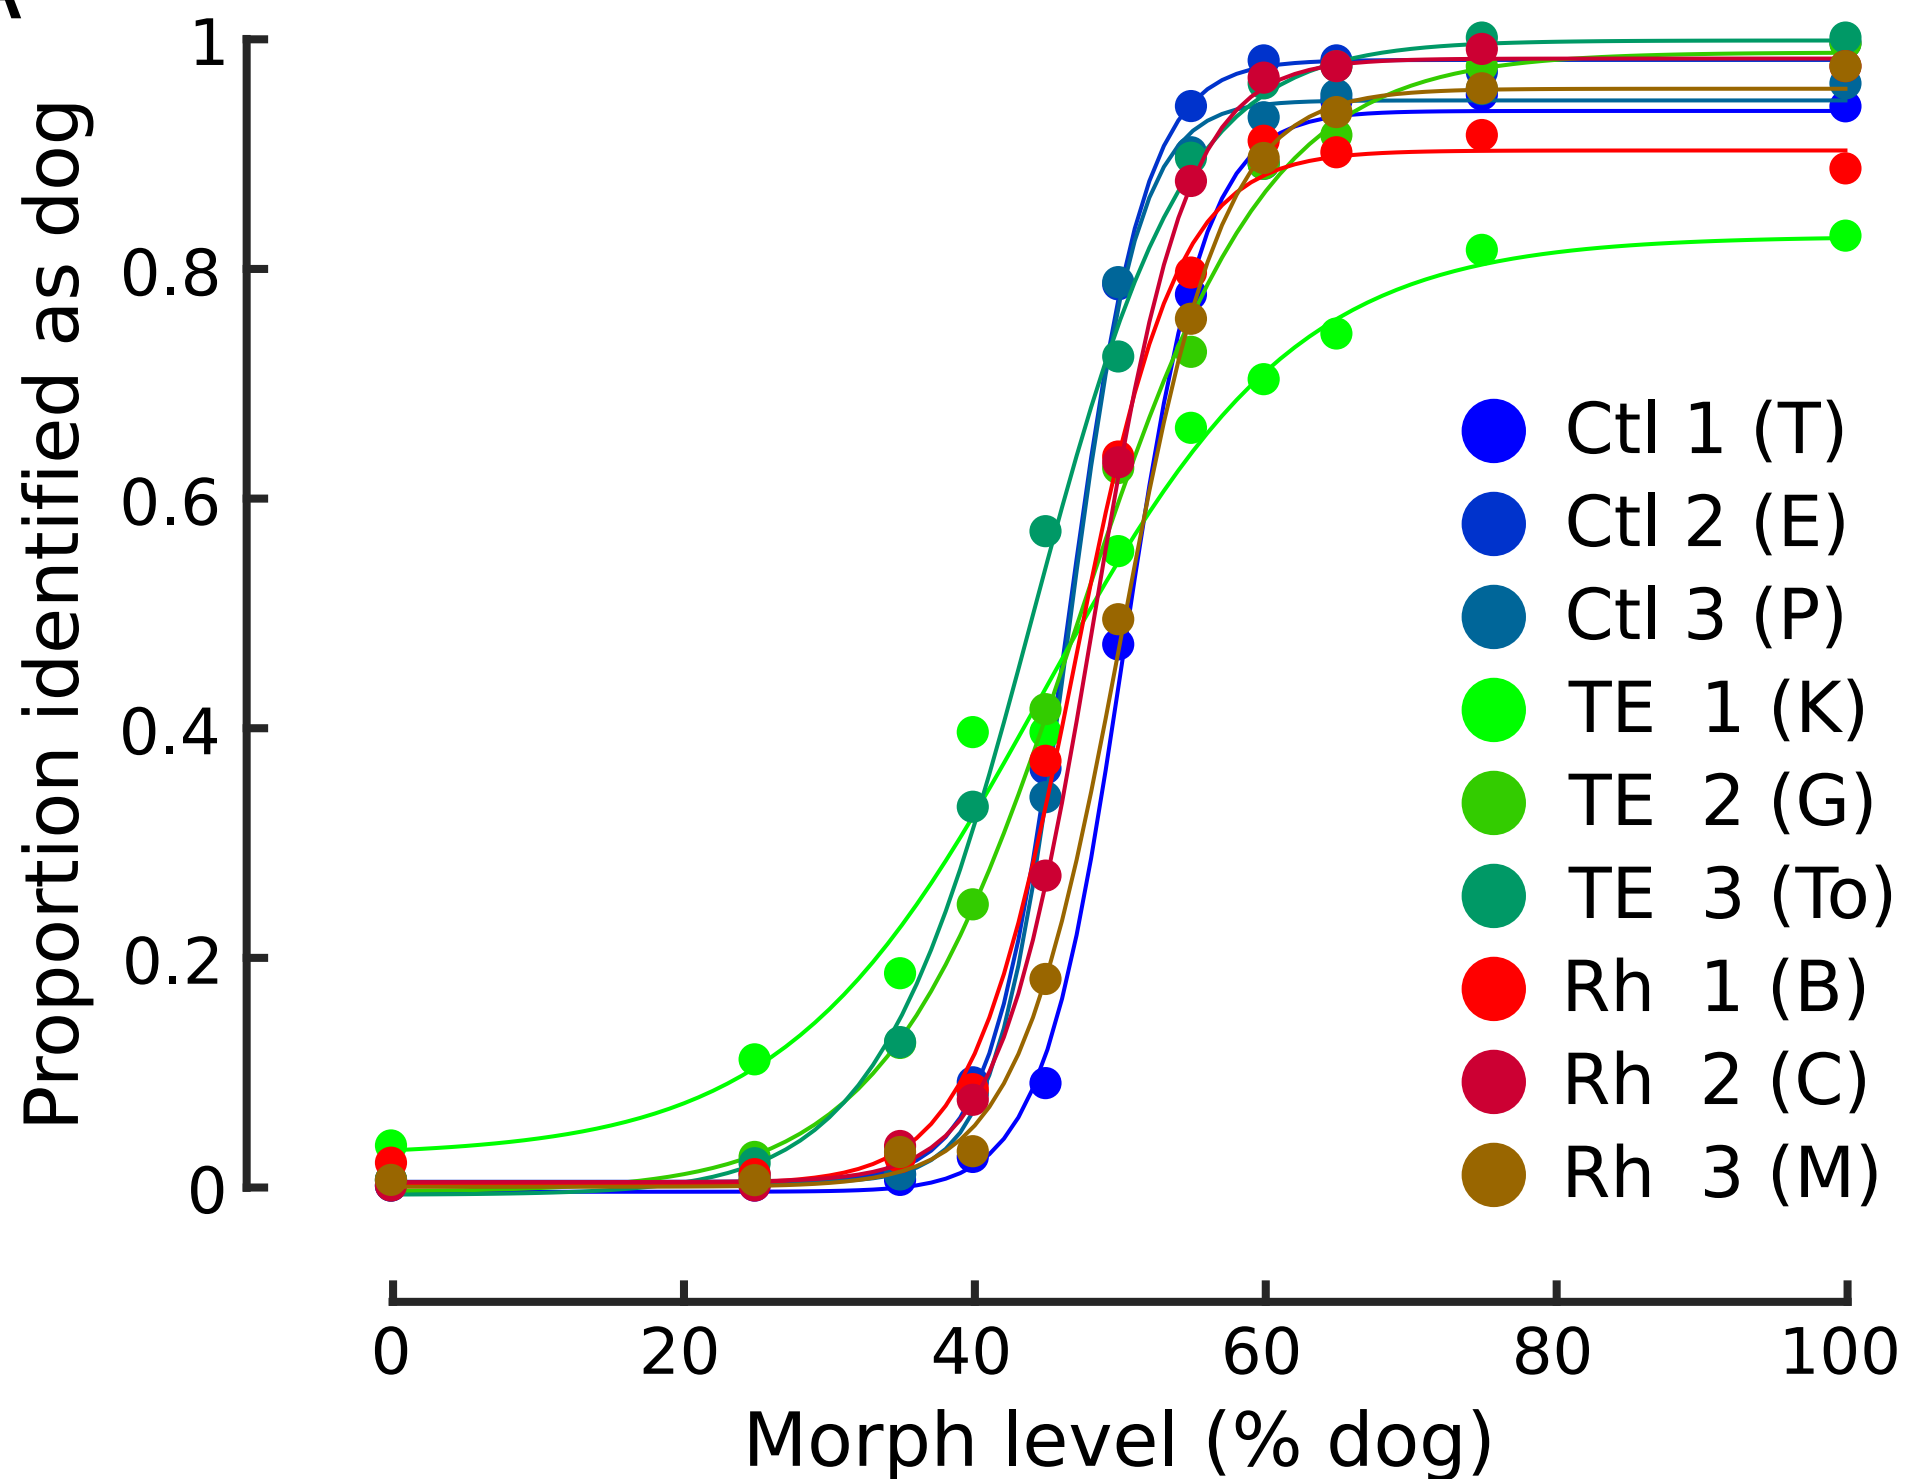**B**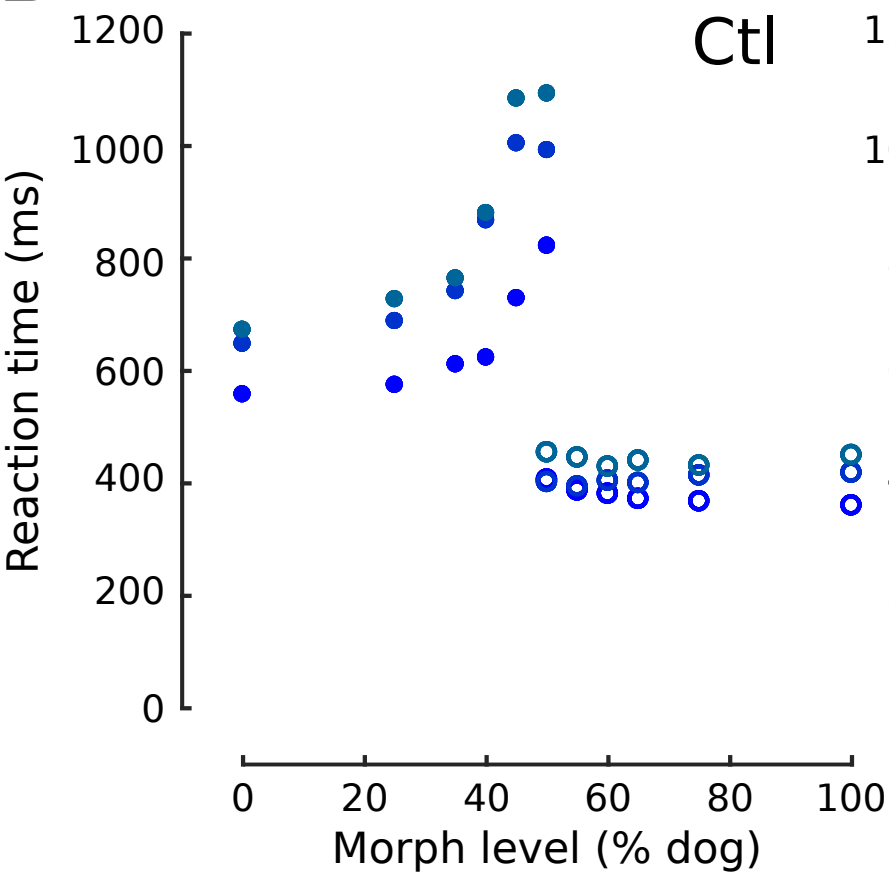**C**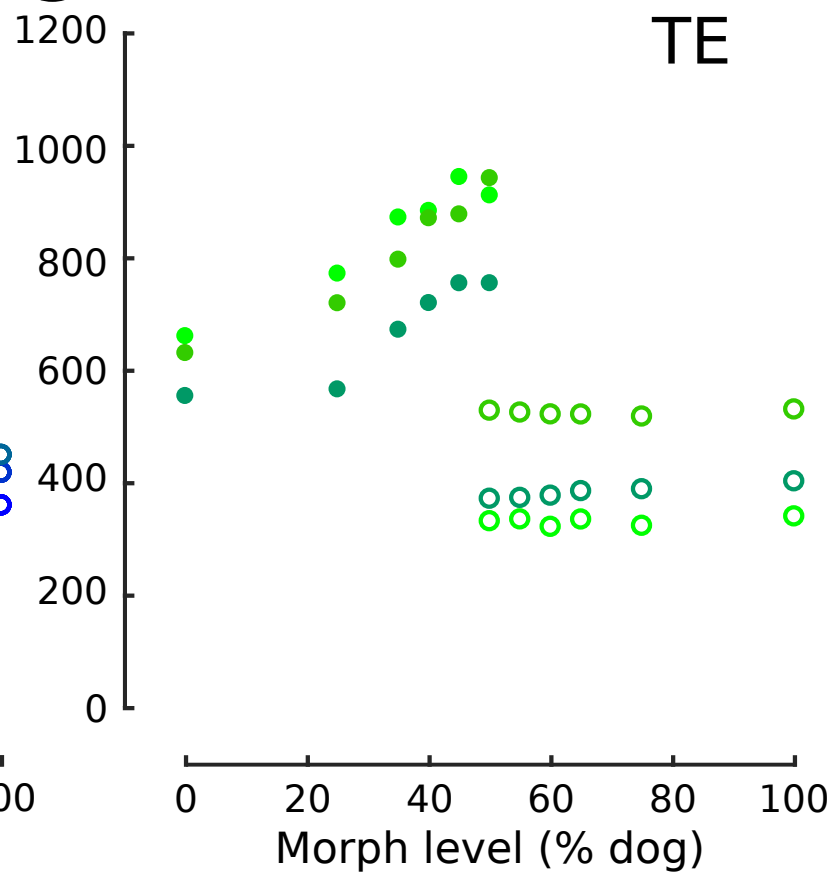**D**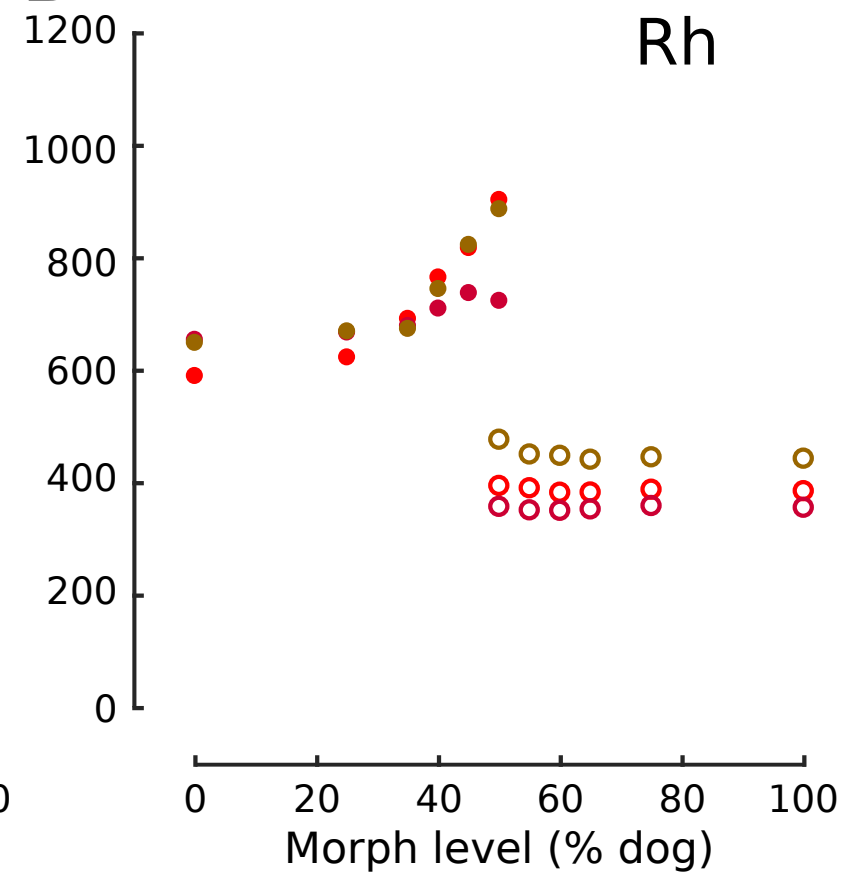

Supplement: supp [file elife-36310-supp-v1.zip]

**A**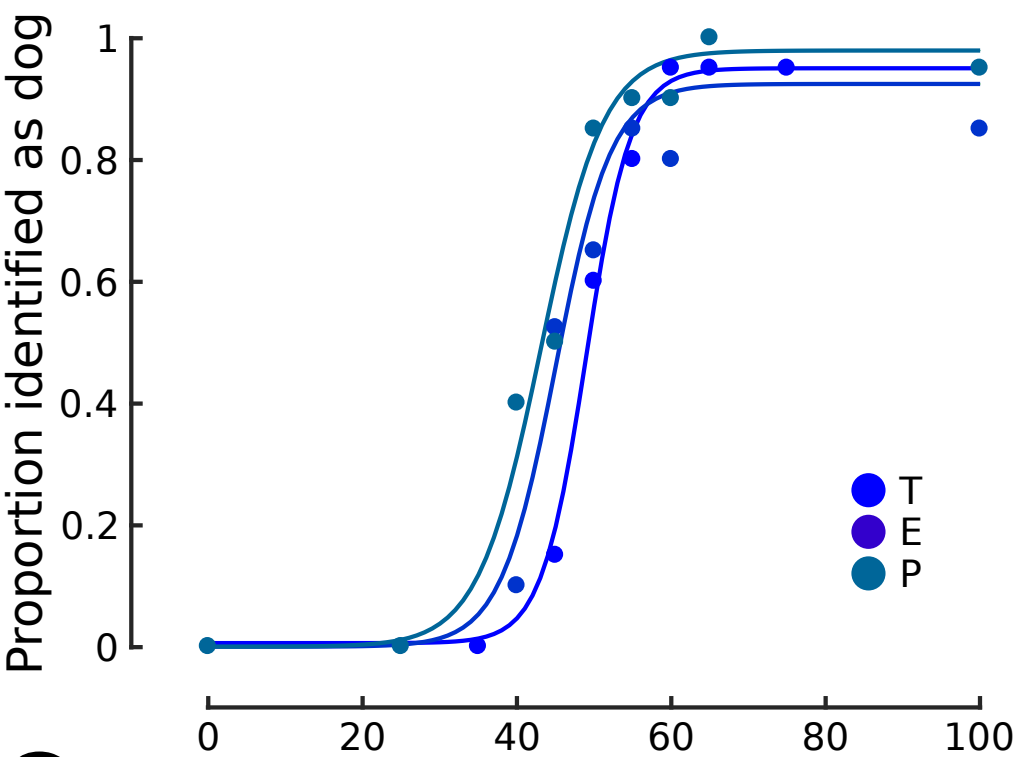**B**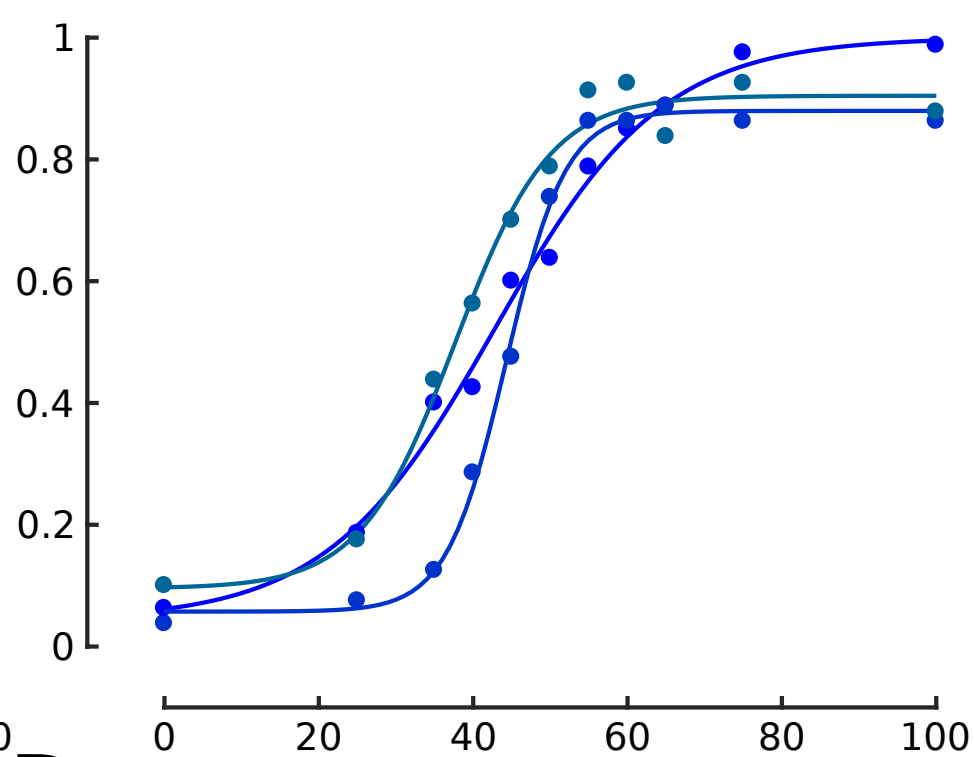**C**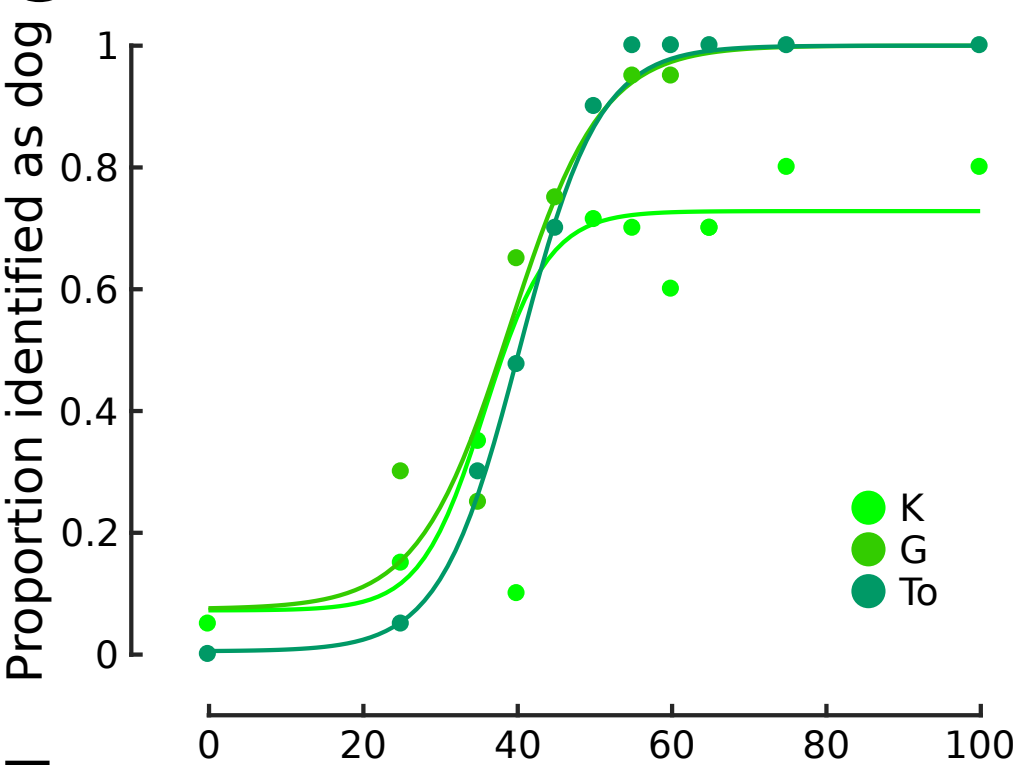**D**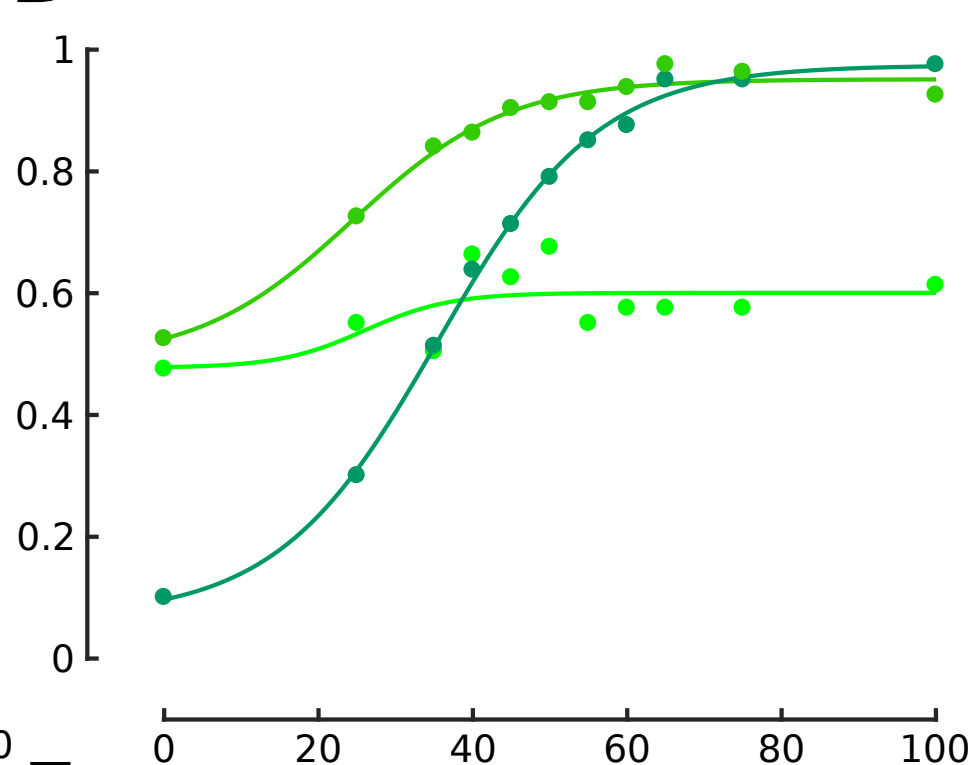**E**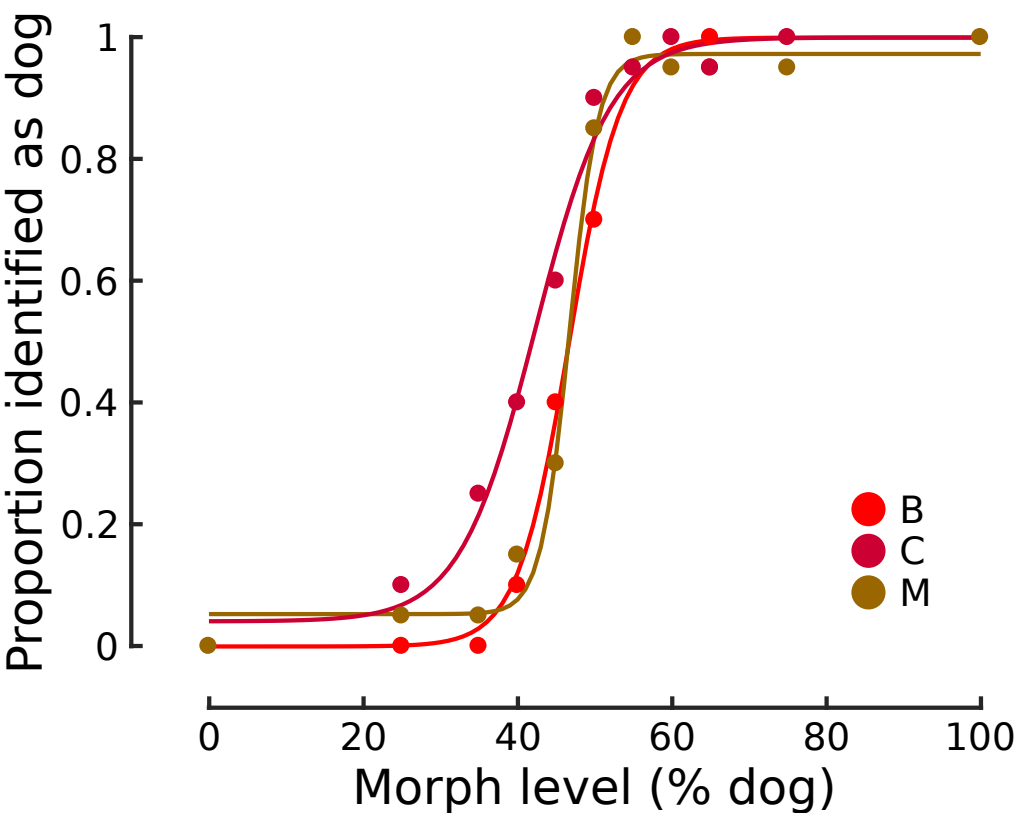**F**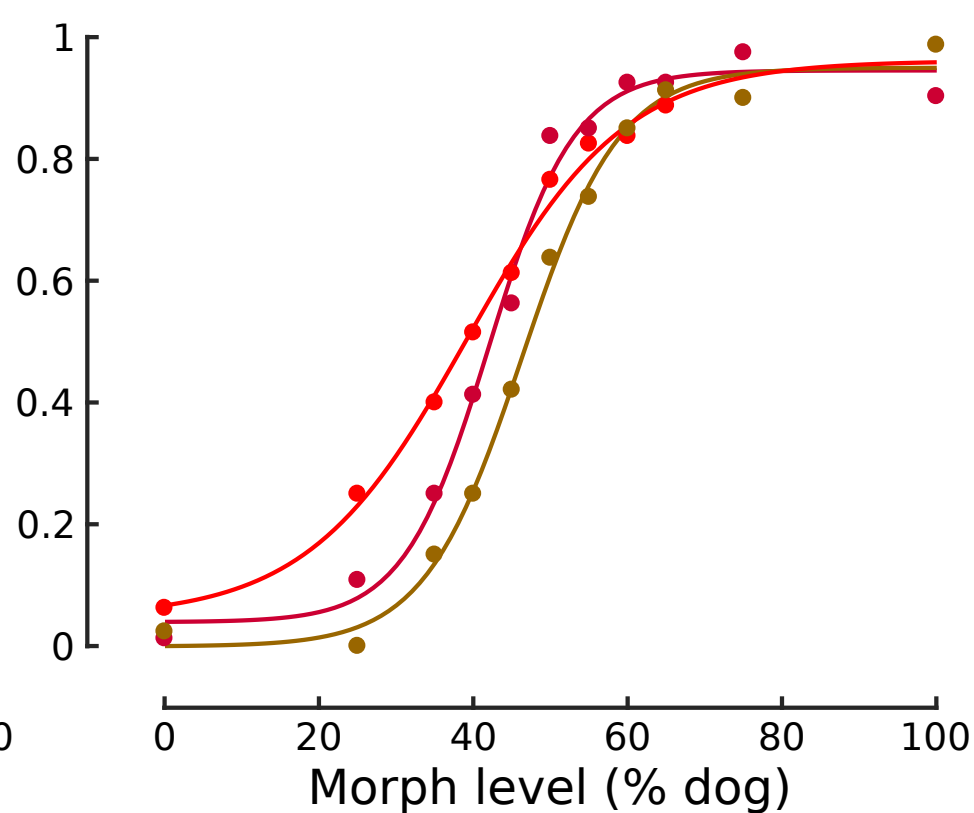

Supplement: supp [file elife-36310-supp-v1.zip]

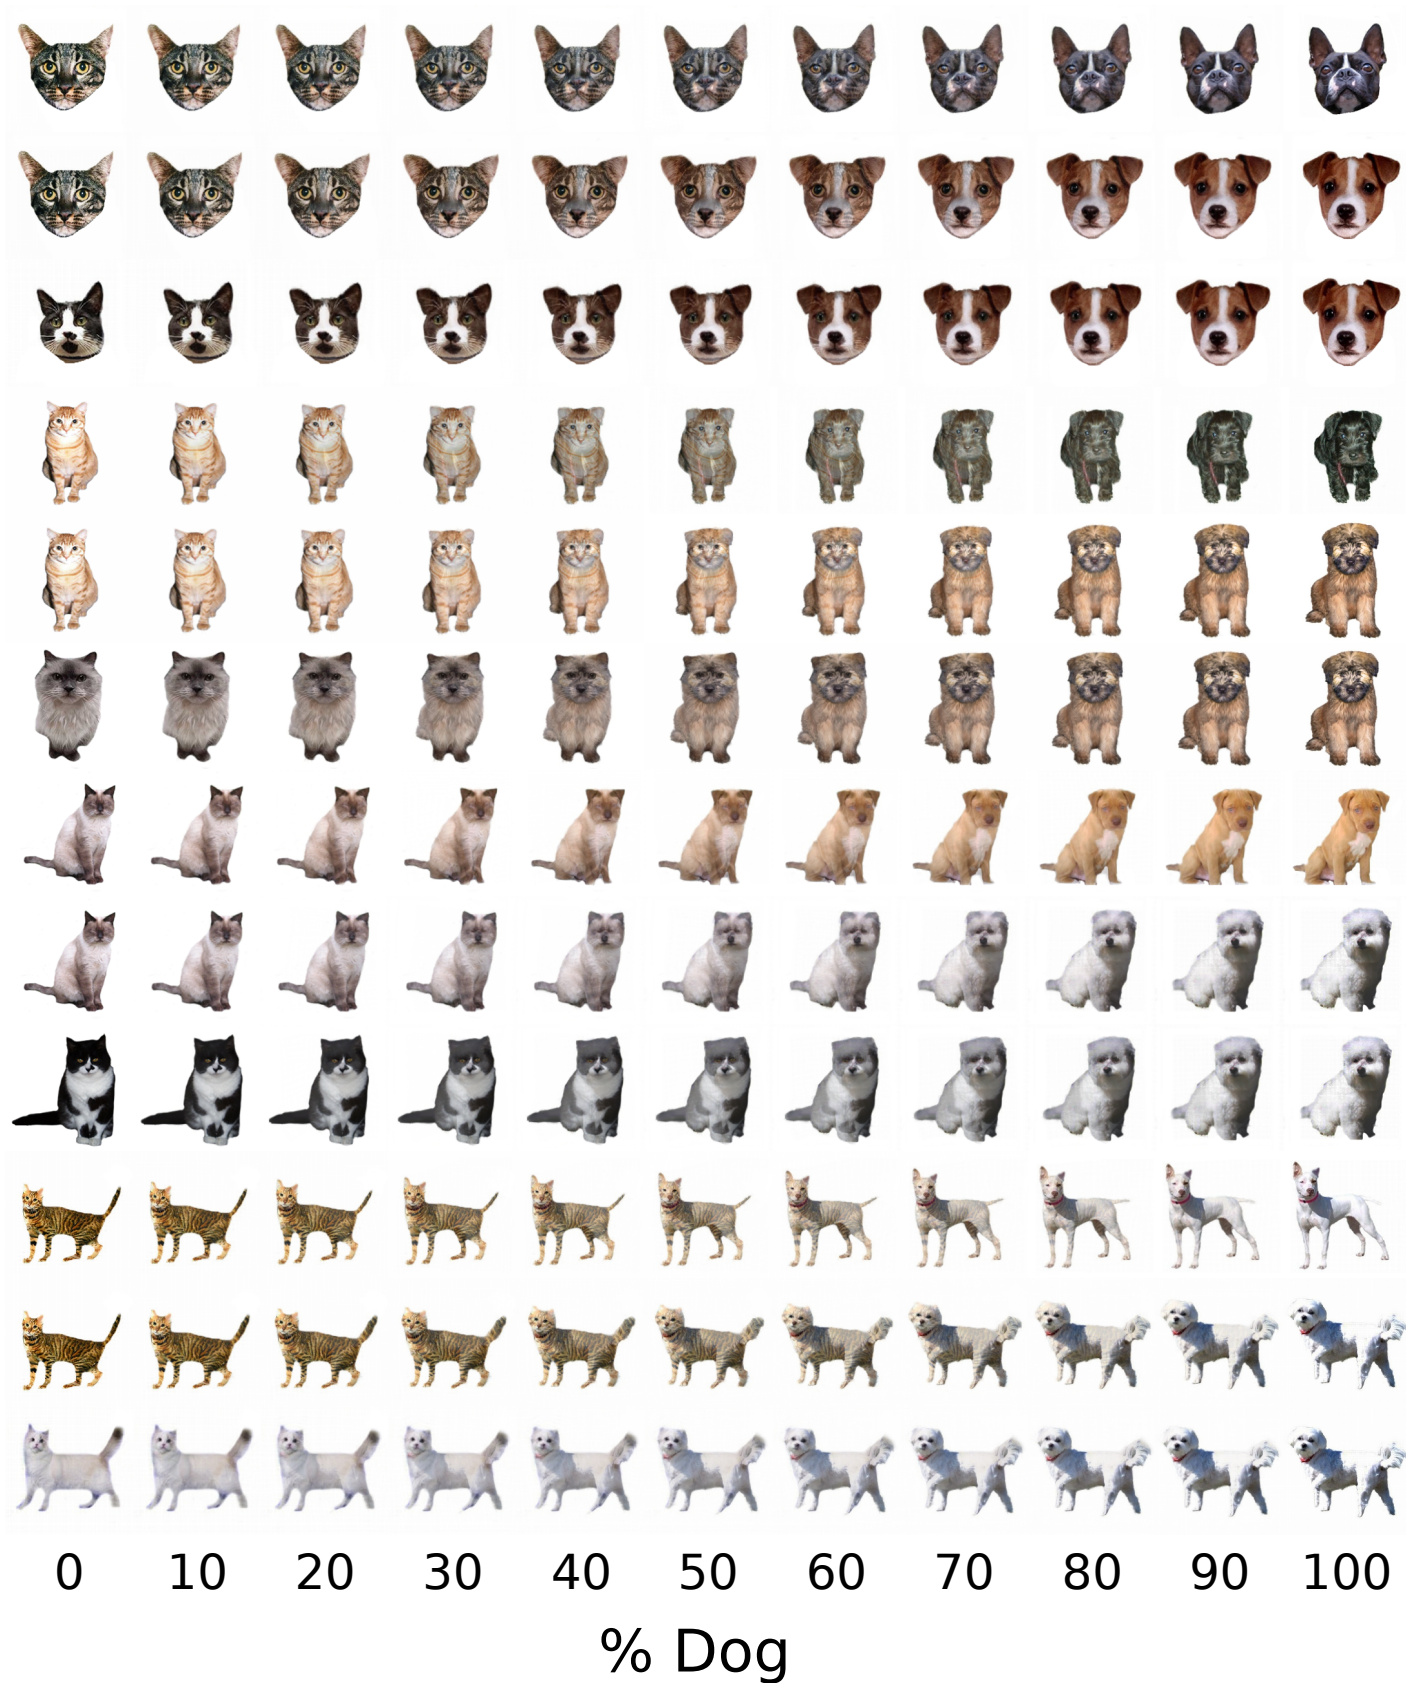

Supplement: supp [file elife-36310-supp-v1.zip]
